# Supplementary material
Source: ML conference proceedings conference paper supplement (https://openreview.net/forum?id=zuHs6RHQwT)
Supplement: supplementary_material [file universality_with_abstract_algorithms_with_appendix.pdf › supplementary/appendix/universality_with_abstract_algorithms_with_appendix.pdf]

---

# Uncovering a Universal Abstract Algorithm for Modular Addition in Neural Networks

---

Anonymous Author(s)

Affiliation

Address

email

## Abstract

1 We propose a testable universality hypothesis, asserting that seemingly disparate  
2 neural network solutions observed in the simple task of modular addition are  
3 unified under a common abstract algorithm. While prior work interpreted vari-  
4 ations in neuron-level representations as evidence for distinct algorithms, we  
5 demonstrate—through multi-level analyses spanning neurons, neuron clusters, and  
6 entire networks—that multilayer perceptrons and transformers universally imple-  
7 ment the abstract algorithm we call the approximate Chinese Remainder Theorem.  
8 Crucially, we introduce approximate cosets and show that neurons activate exclu-  
9 sively on them. Furthermore, our theory works for deep neural networks (DNNs).  
10 It predicts that universally learned solutions in DNNs with trainable embeddings  
11 or more than one hidden layer require only  $\mathcal{O}(\log n)$  features, a result we empir-  
12 ically confirm. This work thus provides the first theory-backed interpretation of  
13 *multilayer* networks solving modular addition. It advances generalizable inter-  
14 pretability and opens a testable universality hypothesis for group multiplication  
15 beyond modular addition.

## 16 1 Introduction

17 The *universality hypothesis* posits that neural networks learning related tasks converge to similar in-  
18 ternal solutions and that shared principles will underlie their representations regardless of architecture  
19 or initialization [1–3]. If true, it could provide a theoretical foundation for generalizing interpretabil-  
20 ity across diverse neural systems. Yet recent studies on related tasks (modular addition [4–8] and  
21 permuting lists [8, 9]) have cast doubt on this hypothesis by presenting *disjoint* interpretations of  
22 what networks learn between the two tasks, and even within the sole task of modular addition.

23 **We unify prior interpretations on modular addition.** By presenting a generalization of cosets—sets  
24 of elements with strict modular equivalence—to *approximate cosets* containing elements that are  
25 “behaviorally similar,” instead of equivalent, our results abstract away the low-level details of how  
26 weights compute activations. This lets us show all previous interpretations [4–7, 10] are consistent  
27 under one common abstract algorithm we call the *approximate Chinese Remainder Theorem* (aCRT)  
28 (section 4.2). This abstraction reconciles the diversity in previously discovered mechanisms by  
29 interpreting them as different realizations of one algorithmic template. The main empirical results  
30 validate the breadth of our abstraction’s accuracy across hyperparameters, architectures, and depth.

31 **We open the universality hypothesis as a testable conjecture across all group-theoretic datasets.**  
32 On modular addition (cyclic groups) we prove that all ReLU neurons learning sinusoidal functions  
33 activate only on approximate cosets or linear combinations of them (Theorem 4.4), giving a direct  
34 construction that instantiations of the abstract aCRT are learned. As our approximate cosets generalize  
35 cosets, work finding coset circuits in networks trained on permuting lists (permutation groups) [9]  
36 aligns with our results. This gives universality between datasets involving incredibly different groups.

37 **We further the community’s understanding of interpretations on modular addition.** Assuming  
 38 neurons each learn a single frequency, we prove that networks exponentially reduce incorrect logit  
 39 mass as more distinct frequencies are learned, concentrating the output near a Dirac on the correct  
 40 answer. This recovers the theoretical result of [7], that 1-layer networks with neurons corresponding  
 41 to each of the  $\lfloor \frac{n}{2} \rfloor$  total frequencies that exist mod  $n$  have learned the maximum margin solution.  
 42 Furthermore, a corollary predicts that deep neural networks (DNNs) have small margins between  
 43 correct and incorrect logits unless  $\mathcal{O}(\log n)$  features are learned. These predictions are empirically  
 44 validated across architectures, training regimes and both prime and composite moduli, whereas past  
 45 works focused on prime moduli and representative networks from few seeds.

## 46 2 Related work

47 The first interpretability work in this domain aimed to understand the phenomenon of *grokking*  
 48 [11]. Nanda et al. [4] analyzed 1-hidden layer transformers trained on modular addition, finding  
 49 sinusoidal patterns of three to eight different frequencies in the weights, activations and attention.  
 50 They showed that for each frequency, the embeddings placed inputs on a circle, and the network  
 51 performed angle addition on this circle. Since adding angles corresponds to multiplying complex  
 52 numbers, this nonlinear operation was attributed to the attention mechanism. This was termed the  
 53 *Fourier Multiplication Algorithm* (later *Clock* [5]), and validated through ablation experiments.

54 Follow-up work proposed a generalization of the *Fourier Multiplication Algorithm* called *Group*  
 55 *Composition via Representations* (GCR) algorithm [10], which extended the idea of angle addition by  
 56 treating group elements as linear operators and composing them to simulate group multiplication,  
 57 aiming to unify mechanisms across group tasks. They applied GCR to both modular addition and  
 58 permutations ( $S_n$ ), as representative group settings. However, later work by Stander et al. [9] reverse-  
 59 engineered models trained on  $S_n$  under identical conditions and found that networks instead learn  
 60 coset-based circuits, refuting the GCR universality claim. Furthermore, Zhong et al. [5] showed  
 61 that in modular addition, training hyperparameters could induce learning qualitatively different  
 62 mechanisms. They introduced the *Pizza* circuit, which contrasted with [4]’s clock. They even showed  
 63 that both clock and pizza circuits could coexist within the same network simultaneously, suggesting  
 64 that even with fixed data, networks could converge to non-unique mechanisms.

65 Meanwhile, theoreticians explored idealized settings for modular addition: Gromov [6], constructed  
 66 a solution for 1-layer multilayer perceptrons (MLPs) with quadratic activations, showing a local  
 67 minimum exists where each neuron specializes to a sinusoid of a single frequency, and consequentially  
 68 each  $\lfloor \frac{n}{2} \rfloor$  frequency is represented by some neuron in the network. Later, it was proven that this  
 69 solution maximizes the margin [7], while independently and simultaneously, work connected margin  
 70 maximization to grokking in similar networks [12].

71 By this point, the universality hypothesis appeared untenable. No similarities were found across group  
 72 tasks and even on *just* modular addition, 1-layer MLPs found  $\lfloor \frac{n}{2} \rfloor$  frequencies, 1-layer transformers  
 73 learned substantially less, and changing hyperparameters resulted in learning different circuits.

## 74 3 Background

75 **Modular addition**, written as  $c = (a + b) \bmod n$ , gives the remainder  $c$  when the sum  $a + b$  is  
 76 divided by  $n$ . For example,  $5 + 7 = 12$ , and  $12 \bmod 12 = 0$ . We can think of this as wrapping  
 77 numbers around a circle of size  $n$ , once we pass  $n$ , we start over at 0. This arithmetic defines a  
 78 structure known as the **cyclic group**  $C_n = \{0, 1, \dots, n - 1\}$ . In  $C_n$ , every number is equivalent to  
 79 its remainder class modulo  $n$ , denoted  $(\bmod n)$ , e.g.  $8 \equiv 2 \pmod{6}$ , since  $8 = 6 \cdot 1 + 2$ . Modular  
 80 arithmetic also supports multiplication: for instance,  $x \cdot y \equiv 1 \pmod{n}$  when  $y$  is the **modular**  
 81 **inverse** of  $x$ , which we denote  $x^{-1}$ . These inverses exist when  $x$  and  $n$  are coprime.

82 Next, consider remainders mod  $m$ , where  $m$  divides  $n$ . This coarser division groups elements of  $C_n$   
 83 into **cosets**—sets of values that differ by multiples of  $m$ . For example, in  $C_6$ , the elements can be  
 84 grouped into three cosets mod 3:  $\{0, 3\}$ ,  $\{1, 4\}$ , and  $\{2, 5\}$ . Each coset marks out equally spaced  
 85 points on the circle—it is a cycle. They will play a key role in our work, as neurons (and neuron  
 86 clusters) will perform coset-like computations. See Appendix A for more discussion on group theory.

**The Chinese Remainder Theorem (CRT)** provides a way to simplify computations modulo  $n$  by breaking them into smaller, independent computations. If  $n$  factors into coprime integers (meaning they share no factors)  $n = q_1 q_2 \cdots q_k$ , then computing  $(a + b) \bmod n$  is equivalent to computing  $(a + b) \bmod q_i$  for each  $q_i$ , then reconstructing the original result. The CRT guarantees that the system of congruences  $(a + b) \equiv m_i \pmod{q_i}$  (for  $i = 1, \dots, k$ ) has a unique solution modulo  $n$ . Each equation defines a coset, and the intersection of these cosets gives the final result. For example, suppose we want to find  $c = (a + b) \bmod 91$  that satisfies:  $c \equiv 3 \pmod{7}$ ,  $c \equiv 10 \pmod{13}$ . Each congruence defines a coset  $\{3, 10, 17, \dots\}$  and  $\{10, 23, 36, \dots\}$  respectively. Their intersection is 10 and thus the unique solution is  $c = 10$ . *We hypothesize that networks learn structure similar to the CRT decomposition to solve  $a + b \pmod{n}$ .*

**Particular Cayley graphs and generating Cayley graphs** are critical for understanding section 4.1. Recall  $C_n = \{0, 1, \dots, n - 1\}$ ; take  $s \in C_n$ ,  $s \neq 0$ . We generate a Cayley graph, called  $\Gamma$ , by starting at  $g \in C_n$  and making an edge to  $(g + s) \bmod n$ , then an edge to  $(g + 2s) \bmod n, \dots$ , until a cycle is made. For example, arrange 6 vertices in a circle. Using  $s = 1$ , step around the circle, connecting neighbors with an edge, generating a 6-cycle. Using  $s = 2$  connects every second vertex, generating two disconnected 3-cycles based on where you start. These 3-cycles are the cosets:  $\{0, 2, 4\}$ ,  $\{1, 3, 5\}$ . Using  $s = 3$  gives three 2-cycles. See  $s = 11$ ,  $n = 66$  in panel 1 of Fig. 2.

**Clock and Pizza Interpretations.** Both circuits embed inputs  $a$  and  $b$  on a circle as  $\mathbf{E}_a = [\cos(2\pi a/p), \sin(2\pi a/p)]$ ,  $\mathbf{E}_b = [\cos(2\pi b/p), \sin(2\pi b/p)]$ . Post-attention, clocks compute the angle sum:  $\mathbf{h}(a, b) = [\cos(2\pi(a+b)/p), \sin(2\pi(a+b)/p)]$ , and pizzas compute a vector mean of the embeddings on the circle:  $\mathbf{h}(a, b) = \frac{1}{2}(\mathbf{E}_a + \mathbf{E}_b) = \frac{1}{2}[\cos(2\pi a/p) + \cos(2\pi b/p), \sin(2\pi a/p) + \sin(2\pi b/p)]$ .

**Problem setting and setup.** The task is modular addition: given inputs  $(a, b)$ , predict  $c = a + b \bmod n$ . The dataset includes all  $n^2$  input pairs. Inputs are either one-hot encoded or embedded via a learned matrix with  $n$  rows and 128-dimensional vectors, resulting in concatenated input pairs  $(\mathbf{E}_a, \mathbf{E}_b)$ . We train 1–4 layer MLPs and 1–4 layer transformers. We use the exact transformer architectures from [5], where attention is modulated by a coefficient  $\alpha$ . Pizza ( $\alpha = 0.0$ ) uses constant, uniform attention (all-ones matrix), while clock ( $\alpha = 1.0$ ) has learnable sigmoidal attention. Both models share the same structure: an embedding layer, one transformer block, and a 1-hidden layer MLP. We follow prior work in applying L2 regularization, shown to encourage generalization [11]. Also, we apply discrete Fourier transforms (DFT) to analyze the frequencies learned by each neuron.

## 4 Theoretical and empirical results

An intuitive overview of the mathematical details in section 4.1 is: neurons learn sinusoidal functions and we explain how to identify which Cayley graph a neuron understands; the Cayley graphs for the cyclic group are circle graphs; these Cayley graphs are generated by connecting every step size  $d^{\text{th}}$  vertex on the circle; approximate cosets are sets of vertices that are close on the graph generated by  $d$ .

### 4.1 Our theoretical toolkit for modular addition

**The simple neuron model.** The mathematics in this paper assumes *the simple neuron model*: neurons approximate or specialize to sinusoidal functions of frequency  $f$ . The primary empirical results (section 4.4) validate this assumption across architectures, hyperparameters, random seeds, moduli and depth (Figs. [4-9]). This model is derived by generalizing the sinusoidal model for neurons from [6, 7] as they assume one-hot encoded inputs to the network, to a model fitting both one-hot encoded architectures and those used in practice (having trainable embeddings [4, 5]). For  $a + b \bmod n$ , the inputs  $a$  and  $b$  are encoded as embeddings  $A = [A_0, \dots, A_{n-1}]$  and  $B = [B_0, \dots, B_{n-1}]$ , where  $A_i, B_i \in \mathbb{R}^d$ . The output logits are  $D = [D_0, \dots, D_{n-1}] \in \mathbb{R}^n$ . Let  $w(U, V)$  be the dot product of all values from  $U$  with edge weights going to  $V$ . Then a **simple neuron**  $N$  has frequency and phase shifts for A and B:  $f, s_A, s_B \in C_n$ , and positive real number  $\alpha$  such that for each  $k \in C_n$  we have

$$w(A_i, N) = \cos \frac{2\pi f(i-s_A)}{n}, \quad w(B_j, N) = \cos \frac{2\pi f(j-s_B)}{n}, \quad w(N, D_k) = \alpha \cos \frac{2\pi f(k-s_A-s_B)}{n}.$$

If training makes neurons converge to simple neurons, then their frequencies can be normalized to be 1 by applying an isomorphism (Def. 4.2). Consequently, qualitative comparisons between neurons of different frequencies are now possible (Fig. 1).

136 **Definition 4.1** (Step size).  $d := (\frac{f}{\gcd(f,n)})^{-1} \pmod{\frac{n}{\gcd(f,n)}}$ , where the modular inverse is used.

137 **Definition 4.2** (Remapping: frequency normalization). Consider the function  $h(x) = \cos(2\pi f x/n)$   
 138 with frequency  $f$ . We define a new function  $g$ , allowing us to perform something analogous to a  
 139 change of variables using the step size  $d$ :  $g(d \cdot x) = h(x) \iff g(x) = h(d^{-1} \cdot x)$ .

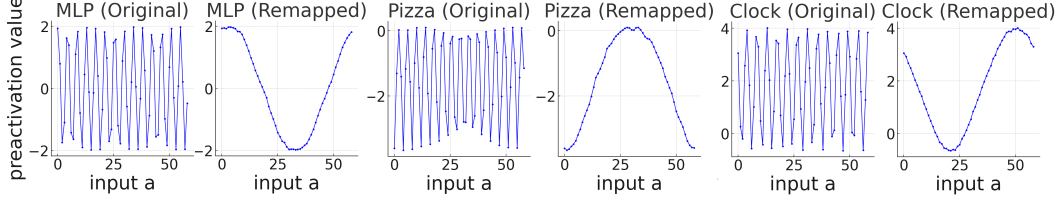

Figure 1: Preactivation values over  $a$  fixing  $b = 5$  on  $c = (a + b) \bmod 59$  of a neuron from an MLP, pizza and clock show qualitative equivalence after remapping (Def. 4.2): they all have frequency 1.

140 **Approximate cosets.** The CRT relies on *cosets*. A neuron with frequency  $f$  will only take values on  
 141 a coset when  $\gcd(f, n) > 1$ . Since our experiments suggest neural networks approximate the CRT’s  
 142 decomposition *even when the learned frequencies don’t factor the modulus*, we instead generalize  
 143 cosets from requiring a strict equivalence among elements to **approximate cosets**. These require  
 144 elements to be similar, which means the shortest path distance on their Cayley graph is small. Later,  
 145 theorem 4.4 gives that all neuron activations ( $\text{ReLU} > 0$ ) in all layers occur on approximate cosets.

146 Let  $f \in C_n$ . Recall Def. 4.1:  $d$  determines how we step around the circle  $C_n$ . There are  $n' = \frac{n}{\gcd(f,n)}$   
 147 distinct positions reachable in this way. These positions form cycle  $C_{n'}$ , which is a smaller (or equal)  
 148 copy of  $C_n$ .  $d \in C_n$  is the step size in  $C_{n'}$ . Generate  $\Gamma$ , the Cayley graph of  $C_{n'}$  using  $d$ . We now  
 149 introduce **approximate cosets** (approximate equivalence classes) using the minimum path distance  
 150 between vertices in  $\Gamma$ . For distances  $1 \leq k_1 \leq n$  and  $1 \leq k_2 \leq n$ , the approximate coset is the set  
 151 of vertices on the path from  $c - (dk_1)$  to  $c + (dk_2)$ , stepping by  $d$ . If  $\gcd(f, n) > 1$ : elements in  
 152 the same coset as  $c$  are distance 0 from each other as they are the same vertex on the Cayley graph,  
 153 adjacent vertices are distance 1, etc (see panel 1 Fig 2). If  $\gcd(f, n) = 1$ :  $\Gamma$  has one element with  
 154 distance 0:  $c$  (see panel 4 Fig 2). Thus, *approximate cosets are more general than cosets*.

155 **Definition 4.3** (Approximate cosets). Let  $1 \leq k_1 \leq n$  and  $1 \leq k_2 \leq n$ . We call the set  $\{c -$   
 156  $k_1 d, \dots, c - 2d, c - d, c, c + d, c + 2d, \dots, c + k_2 d\}$  an **approximate coset**.

157 **Theorem 4.4.** Simple neurons in layer 1 activate ( $\text{ReLU} > 0$ ) on an approximate coset containing  
 158 the correct answer  $c$ , by concentrating their preactivations on approximate cosets that contain  $a$  and  
 159  $b$ ; all neurons in later hidden layers activate on linear combinations of approximate cosets.

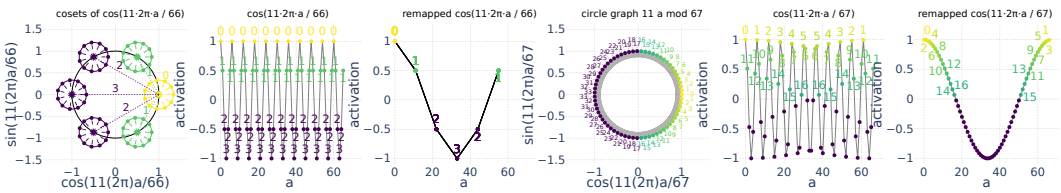

Figure 2: Visualizing how neurons learn approximate coset structure. Panel 1 shows the circle graph on 66 elements generated by starting at  $a = 0$  and taking 6 steps of  $\pm 11$ , creating the  $\frac{66}{11} = 6$  cosets of points  $\{a \pmod{6} \equiv 0\}, \{a \pmod{6} \equiv 1\}, \dots, \{a \pmod{6} \equiv 5\}$ . The graph distance to each coset from coset  $\{a \pmod{6} \equiv 0\}$  (in yellow) is given. 2: the neuron learned  $\cos(\frac{11(2\pi)a}{66})$ ; the distances annotated on points follow from 1. This neuron only activates ( $\text{ReLU} > 0$ ) on distances 0 and 1. 3: remapping shows all members of each coset collapse into an equivalence class. Panels 4-6 show the circle graph on 67 elements generated by  $\pm 11$ ; since  $\gcd(11, 67) = 1$ , the neuron can’t activate at the same strength on equivalent points (cosets) and instead activates with strengths proportional to distances on the Cayley graph. All elements the neuron takes positive values on are an approximate coset, shown in bright viridis colors decaying with distance.



## 4.2 The abstract approximate Chinese Remainder Theorem

By defining approximate cosets, and proving Theorem 4.4, a straightforward construction for the abstract algorithm being instantiated by neural networks can now be given. An abstract algorithm is a general template or high-level strategy for a problem. It outlines the steps to be followed but leaves room for different low-level implementations. For example, the classic breadth-first search algorithm traverses a graph by visiting all neighbors of a node, then all neighbors of those nodes, and so on. While the abstract idea is the same, the implementation details can vary: one version may use a linked list, while another may use a queue. Thus, the compiled machine code can differ significantly, like how the networks features can be computed by very different pizza or clock circuits.

**Remark 4.5.** *The sinusoidal neuron based CRT.* The CRT decomposes the modular system  $(a + b) \bmod n$  into  $\mathcal{O}(\log(n))$  modular subsystems. This follows from a number having at most  $\log(n)$  factors (e.g.  $j = 2^i$ , has  $\log_2(j)$  factors). The CRT solves the original modular system by intersecting the cosets that the solution of each subsystem belongs to. Suppose the CRT can be used to decompose  $(a + b) \bmod n$ . Then, a sinusoidal neuron based CRT is constructed with  $\mathcal{O}(\log(n))$  unique frequencies  $f$  with  $\gcd(f, n) = f$ . Make  $\frac{n}{f}$  sinusoids, one for each coset ( $\mathcal{O}(n)$  neurons), that are only positive on one of the cosets  $\{a + b \pmod{\frac{n}{f}}\}$  using the  $y$ -intercept (neuron bias) so the neuron only activates if the answer is in the coset. The argmax of the linear combination of these neurons to the output logits selects the correct answer deterministically.

Armed with Theorem 4.4, deriving an abstract algorithm that Remark 4.5, instantiates is simple. Remark 4.5 assumes “the CRT can decompose  $(a + b) \bmod n$ ” into coset structure, but cosets are a subset of approximate cosets, making cosets a specific implementation under an abstract template. Furthermore, Theorem 4.7 addresses the approximate cosets case ( $f$  does not divide  $n$ ) in section 4.3. It gives that  $\mathcal{O}(\log(n))$  randomly selected frequencies are enough to get reasonable margins between correct and incorrect logits, matching the number of frequencies required by the CRT.

**Abstract algorithm 4.6.** *The minimal template: the abstract aCRT.* Take  $\mathcal{O}(\log(n))$  random frequencies and for each frequency generate sinusoidal neurons with that frequency and set their phases such that they pick out different approximate cosets that the answer  $(a + b) \bmod n$  is in.

Two things are left to show: the  $\mathcal{O}(\log(n))$  frequency bound in section 4.3 and that DNNs learn solutions that are realizations of Algorithm 4.6. The latter is exhaustively validated in section 4.4: finding all architectures are well abstracted by approximate cosets.

## 4.3 How many frequencies are needed to instantiate the aCRT with simple neurons?

We now present Theorem 4.7, which assumes that sinusoids are learned by the neurons. It predicts that networks push incorrect logits down exponentially as the number of frequencies that are learned in the network increases. Analogously to Morwani et al. [7], it gives that the maximum margin solution requires all frequencies to be learned, but also yields additional information about the size of margins a network can acquire with fewer frequencies. A simple corollary gives that  $\mathcal{O}(\log(n))$  frequencies are sufficient to get margins larger than  $\Omega(\log(n))$ .

Let  $n$  be the number of output neurons (the modulus), let  $m$  be the number of distinct frequencies learned by the network and  $m'$  be the maximum output logit value across the dataset. Fix two parameters:  $0 < \delta < 1$ , controlling the required margin between the correct and incorrect outputs;  $0 < \rho < 1$ , the target probability of success. We model the neural network’s output at logit  $k$  by  $h(k) = \sum_{\ell=1}^m \cos\left(\frac{2\pi f_\ell}{n}(k - i - j)\right)$ , where each frequency  $f_\ell$  is drawn uniformly at random from  $\{1, 2, \dots, \frac{n}{2}\}$ . We seek conditions on  $m$  so that, with probability at least  $\rho$ , the value  $h(k)$  is well-separated from the maximum  $m'$  for all incorrect outputs  $k \neq i + j \bmod n$ .

**Theorem 4.7.** *Suppose that an integer  $m$  and reals  $0 < \rho, \delta < 1$  satisfy the inequality*

$$m > \frac{2 \log_e n - 2 \log_e(2 - 2\rho)}{\log_e(\pi/\delta) - 1}.$$

*Then, with probability at least  $\rho$ , for all  $k \neq i + j \bmod n$ , we have  $h(i + j) - h(k) > \delta m$ . See Appendix C for the proof.*

**Corollary 4.8.** *Learning  $\mathcal{O}(\log n)$  distinct frequencies gives a logit margin  $\Omega(\log n)$ ; after softmax, incorrect classes receive at most  $n^{-\Omega(1)}$  probability mass.*

Note: it is still possible for networks to learn solutions utilizing a single frequency! Indeed, these solutions have poor margins, making them poor local minima. Unsurprisingly, they are rarely learned and only show up at the edge of the grid search returned by hyperparameter tuning. We empirically validate corollary 4.8 in Fig. 3 by varying the moduli over multiple orders of magnitude including moduli that are prime, highly composite numbers, composite numbers and powers of only 2, e.g. 64, 256, etc. The samples are such that the  $R^2$  of fitting them with logarithmic functions is very high, empirically verifying the prediction of Corollary 4.8 that indeed  $\mathcal{O}(\log(n))$  frequencies are reasonable. As the data contains both prime and composite moduli, it suggests moduli have little effect on what the network ultimately learns, though if a frequency divides the modulus it can be the case that less neurons of that frequency exist (see Appendix. G.7).

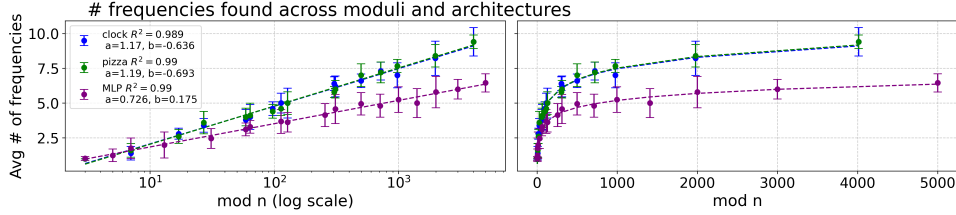

Figure 3: The number of frequencies found in clocks, pizzas, and MLPs as the modulus  $n$  increases. We plot the data on logarithmic and linear axes, showing logarithmic fits have very high  $R^2$  scores.

#### 4.4 Empirical results supporting the simple neuron model and approximate coset abstraction

See Appendix E for experimental details.

**One-hot encoded MLPs.** Previous work shows  $\lfloor \frac{n}{2} \rfloor$  types of neurons are found, each specializing to a sinusoid with one frequency with 1 hidden layer [6, 7]. We show that adding either depth, or a trainable embedding matrix for inputs, causes the network to transition from learning  $\lfloor \frac{n}{2} \rfloor$  types of neurons to much fewer types in Fig. 4. The presence of the trainable embeddings is why the models trained in [4, 8, 5] were observed to learn handfuls of frequencies (3-7) instead of  $\lfloor \frac{n}{2} \rfloor$  frequencies, despite being one hidden layer models.

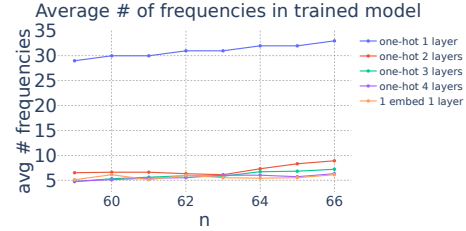

Figure 4: Average number of frequencies found in MLPs over moduli 59-66.

##### The neural preactivations in 1 layer networks.

In the vast majority of cases, neurons in all 1 layer architectures can be approximated well by degree 1 sine functions with integer  $f$ . This is because the preactivations of most neurons are “simple”, meaning that they have frequency equal to 1 once remapped (Definition 4.2) (Fig 1). This is despite the presence of secondary frequencies in smaller width architectures. These occur less often as the width of the layers is increased (Fig 5), which shows neurons with secondary frequencies on the left, and the  $R^2$  of fitting a single sine, or a sum of two sines with different frequencies, through the preactivations on the right. Thus, as the width is scaled, approximating neurons as simple neurons (1 sine is fit through their preactivations) becomes better. Note: at widths excessive for this task ( $\leq 2048$  neurons) it rarely occurs, but it’s the case that a few neurons can learn sinusoids with frequency  $\frac{f}{2}$  (App. G.4 Fig. 28). While these still satisfy our definition of approximate cosets and Theorem 4.4 covers their existence, they break previous theoretical models assuming integer frequency [6, 7].

**Depth’s effect on neural preactivations.** The first layer is fit with a very high  $R^2$  in models of all depths, but adding layers introduces a caveat in the transformer architectures. In MLPs, it is possible to fit every neuron in every layer and maintain 100% test accuracy by assuming the neural preactivations are of the form  $f(a, b) = \sin(fa + \phi) + \sin(fb + \phi)$ , where  $\phi$  is the phase shift (Fig. 6). In transformers however, this only works with a high  $R^2$  for the first layer. The reason is that the form of the logits  $f(a, b) = \cos(f(a + b - c))$ , described by [4] is a second-order (quadratic) sinusoid and starts to appear in layers after the 1st layer, but before the logits. Indeed, we find that in deeper networks, neurons after the first layer can be either simple,  $\cos(f(a + b - c))$ , or a linear combination in superposition of these two forms. Thus, fitting just  $\cos(a + b)$  or just  $\cos(a) + \cos(b)$  is not sufficient to maintain 100% accuracy. To see this, see Fig. 8, which shows the percentage of

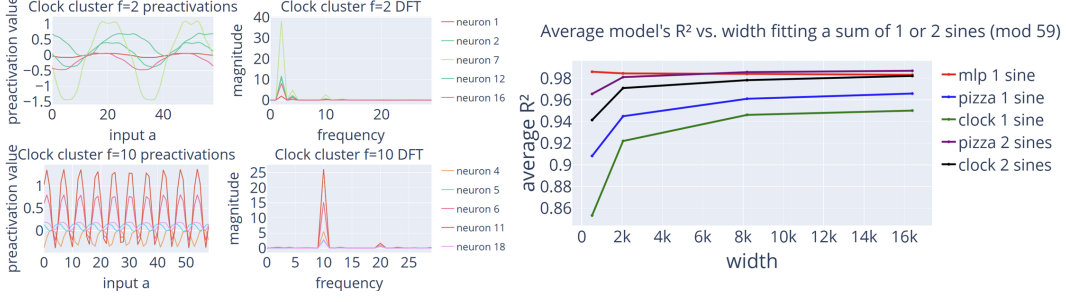

Figure 5: Left: cluster preactivations from a clock with small but present secondary spikes in the DFT. Right: as the width of the models is increased, the presence of the secondary spikes fades, 2 sines is fitting a sum of 2 different  $f$  sines, allowing the inclusion of a secondary peak in the fit.

253 activations that have their best  $R^2$  achieved by fitting just order one sinusoids in  $a$  and  $b$  in a 2-hidden  
 254 layer transformer. Thus, we fit linear combinations of  $(\cos(f(a+b))) + (\cos(fa) + \cos(fb))$  through  
 255 neurons in layers after 1 in Fig. 7 and conclude that transformers “backpropagate the form of the  
 256 logits” more than MLPs, which is why MLPs can be fit well using only first-order sinusoids.

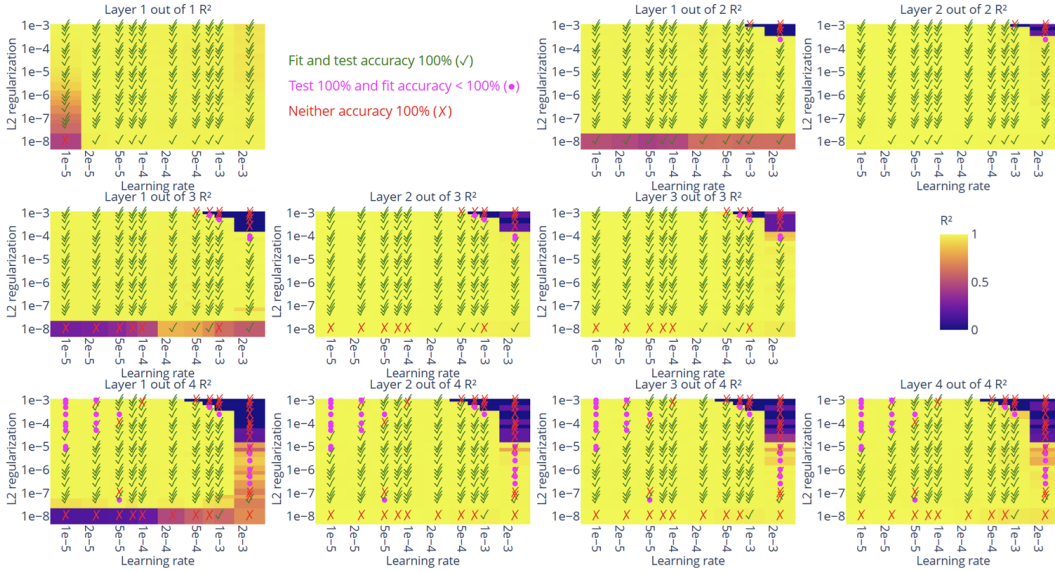

Figure 6:  $R^2$  of fitting each neuron in layer 1 as a simple neuron and fitting a sum of sines of each frequency in layer 1 through layers 2-4 for 1,2,3 and 4 layer MLPs. The large volume of green checkmarks implies replacing neurons with simple neurons does not decrease the network's accuracy implying that our abstraction is robust to changes in training conditions and architectures.

257 Furthermore, we could see a preference for learning precise cosets (should they exist) over approxi-  
 258 mate cosets as this could reduce approximation error in DNNs. We explore this in Fig. 9, showing  
 259 that for  $n = 66$ , all architectures present a preference for learning precise cosets. This is strong  
 260 evidence supporting the abstract aCRT algorithm as it implies DNNs try to learn CRT-like behaviour.

261 Our results show that in all architectures, layer 1 uses only simple neurons, with other layers still  
 262 utilizing them, implying Algorithm 4.6 is instantiated. Furthermore, it follows from this that we've  
 263 shown that all neurons downstream of layer 1 activate on linear combinations of approximate cosets.  
 264 Combined with the results of [9], that the GCR algorithm [8] is not universal and instead coset  
 265 circuits are learned in networks learning group multiplication in the permutation group, we open the  
 266 universality hypothesis on group multiplication datasets as Conjecture 4.9.

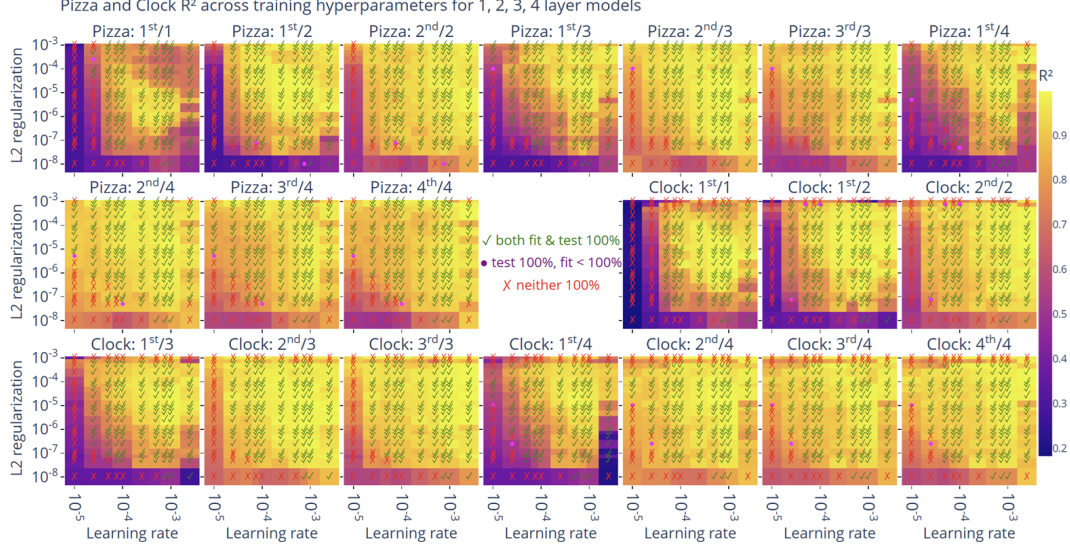

Figure 7:  $R^2$  of fitting order 1 sines through neurons in layer 1, then fitting a sum of length equal to the number of unique frequencies in layer 1, of order one or order two sines for layers 2, 3, 4. The large volume of green checkmarks tells us that our abstraction doesn't affect the model's accuracy and is robust to varying training conditions and architectures.

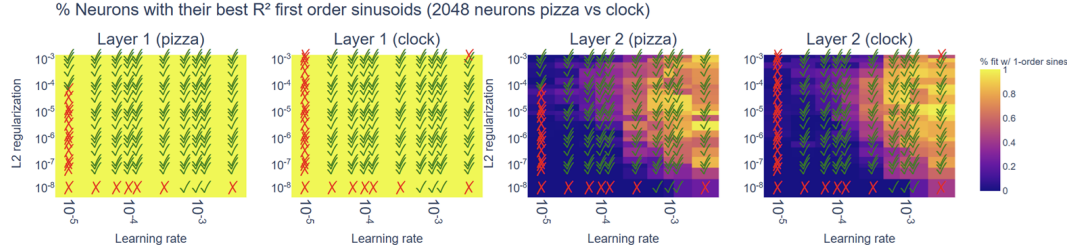

Figure 8: The percent of neurons with their best fit involving only order 1 sines. The result can be interpreted as neurons existing that are operating on first order sinusoids in deep layers. With ideal hyperparameters, almost 100% of neurons in layer 2 can have their best fits coming from order one sinusoids, though this occupies very little volume in the hyperparameter grid.

267 **Conjecture 4.9.** *The universality in structures learned by networks trained to fit group multiplication*  
 268 *will be found as coset circuits, and more generally as approximate coset circuits computing features.*

269 At this point, we have shown that our definition of approximate cosets functions as a sufficient  
 270 abstraction for simplifying the representations learned by networks of various architectures.

## 271 5 Discussion and Conclusion

272 We argue that approximate cosets are critical in all architectures because they instantiate the aCRT.  
 273 We support this both with empirical evidence across a large range of hyperparameters, seeds and  
 274 different moduli, and theorems. Approximate cosets provide DNNs with structures analogous to  
 275 the cosets the CRT operates on. The CRT uses  $\mathcal{O}(\log(n))$  modular subsystems, and Corollary 4.8  
 276 gives that DNNs need  $\mathcal{O}(\log(n))$  unique frequencies to analogously induce modular subsystems.  
 277 Furthermore, approximate cosets shed light on how the network learns second order sines with  
 278 ReLU activations (activating on the coset of  $c$  requires understanding coset membership of  $a + b$ ), a  
 279 previously unexplained result in Nanda et al. [4] and Chughtai et al. [10]. As the proof for theorem  
 280 4.4 shows, a neuron learns to fire strongly on the coset that  $c$  is in, by understanding which cosets



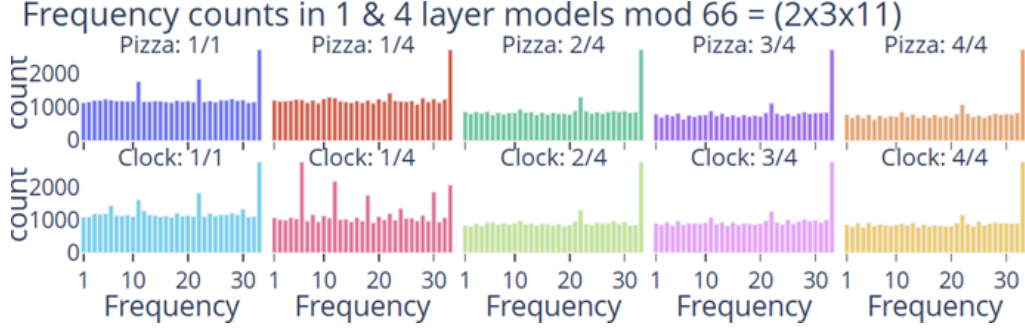

Figure 9: Histograms of the number of times each frequency was learned while training on  $(a + b) \bmod 66$ . Note: attention in the clock models results in learning frequency 6 cosets in layer  $1/4$ .

281  $a$  and  $b$  are in. The conclusion is that in abstracting away the small details in how weights in  
 282 different architectures explicitly compute modular addition, we unify previous interpretations under  
 283 the abstract aCRT template.

284 Our initial hypothesis was that neural networks trained on modular addition with composite moduli  
 285 would learn the Chinese Remainder Theorem (CRT), leveraging coset structure where it naturally  
 286 applies. Early empirical results supported this view, revealing a preference for frequencies that  
 287 cleanly divide the modulus—suggesting alignment with exact coset structure. However, we observed  
 288 that networks often learned only a single such frequency, alongside others that did not correspond to  
 289 precise cosets. This prompted further investigation. Upon examining both qualitative patterns and  
 290 quantitative behavior, we found no meaningful distinction between neurons associated with coset-  
 291 aligned frequencies and those that were not. This observation led to a critical insight: networks may be  
 292 implementing an algorithmic template resembling the CRT even when its mathematical prerequisites  
 293 are not strictly satisfied. This realization motivated the formulation of the abstract approximate CRT  
 294 (aCRT), generalizing the role of cosets to approximate cosets as a unifying structure.

295 Due to modular addition being multiplication in the cyclic group and our approximate cosets general-  
 296 izing cosets, our interpretation establishes universality between cyclic and permutation groups. This  
 297 follows from the result that coset circuits are learned in networks trained on the permutation group  
 298 [9]. Thus, we establish universality between very different tasks, related only by the fact they are both  
 299 groups. This allows us to open the *testable* universality hypothesis on group multiplication datasets.

### 300 5.1 Limitations and future work

301 In group theory, a group with the least structure is a cyclic group of prime order and by Cayley’s  
 302 theorem, all groups are subgroups of the permutation group—the king of group structure. Despite  
 303 these groups occupying the upper and lower extremes of structure, our result yields universality in  
 304 the structure DNNs learn on these tasks. This unification with Stander et al. [9] is why we believe it’s  
 305 likely that networks learning all groups will utilize structures that can be viewed under a more general  
 306 definition—*approximate cosets involving distances on Cayley graphs*. A core limitation of our work  
 307 is that we do not explore the groups between these two extremes. We believe that this is a promising  
 308 avenue for future work to explore, with successful testing offering the potential to demonstrate that  
 309 the universality hypothesis is true in the very diverse space of all possible group multiplications.

310 While we are the first to point out *how* to cause a phase transition from  $\mathcal{O}(n)$  to  $\mathcal{O}(\log(n))$  learned  
 311 frequencies (Fig. 4), we don’t know *why* it occurs. Theorem 4.7 only says this solution should have  
 312 great margins, and it does [7]. This gives two directions for future work: *why* this happens: are the  
 313 training dynamics wildly different? *What* causes it: does the network learn something significantly  
 314 different that both we, and prior work, fail to see? The fact these are open questions—on a math task  
 315 that’s become very well understood over 1500 years since inception—*suggests an urgent need for*  
 316 *new interpretability tools*. Finally, Theorem 4.7 doesn’t answer how many neurons are needed per  
 317 learned frequency; giving a trivial lower bound of  $\Omega(1)$  neurons. Empirical results are in Appendix  
 318 G.7, but don’t give an obvious direction for proving bounds. *We believe answering this is necessary*  
 319 *for the interpretability community to gain a full understanding of a task*. This may be an entire paper  
 320 in itself. It looks non-trivial (to us) and requires careful arguments with non-linear ReLU activations.

## References

- [1] Chris Olah, Nick Cammarata, Ludwig Schubert, Gabriel Goh, Michael Petrov, and Shan Carter. Zoom in: An introduction to circuits. *Distill*, 5(3):e00024–001, 2020.
- [2] Yixuan Li, Jason Yosinski, Jeff Clune, Hod Lipson, and John Hopcroft. Convergent learning: Do different neural networks learn the same representations? *arXiv preprint arXiv:1511.07543*, 2015.
- [3] Minyoung Huh, Brian Cheung, Tongzhou Wang, and Phillip Isola. The platonic representation hypothesis. *arXiv preprint arXiv:2405.07987*, 2024.
- [4] Neel Nanda, Lawrence Chan, Tom Lieberum, Jess Smith, and Jacob Steinhardt. Progress measures for grokking via mechanistic interpretability. In *The Eleventh International Conference on Learning Representations*, 2023. URL <https://openreview.net/forum?id=9XFSbDPmdW>.
- [5] Ziqian Zhong, Ziming Liu, Max Tegmark, and Jacob Andreas. The clock and the pizza: Two stories in mechanistic explanation of neural networks. In *Thirty-seventh Conference on Neural Information Processing Systems*, 2023. URL <https://openreview.net/forum?id=S5wmbQc1We>.
- [6] Andrey Gromov. Grokking modular arithmetic. *arXiv preprint arXiv:2301.02679*, 2023.
- [7] Depen Morwani, Benjamin L. Edelman, Costin-Aureli Oncescu, Rosie Zhao, and Sham M. Kakade. Feature emergence via margin maximization: case studies in algebraic tasks. In *The Twelfth International Conference on Learning Representations*, 2024. URL <https://openreview.net/forum?id=i9wDX850jR>.
- [8] Bilal Chughtai, Lawrence Chan, and Neel Nanda. A toy model of universality: Reverse engineering how networks learn group operations. In *International Conference on Machine Learning*, pages 6243–6267. PMLR, 2023.
- [9] Dashiell Stander, Qinan Yu, Honglu Fan, and Stella Biderman. Grokking group multiplication with cosets. In *Forty-first International Conference on Machine Learning*, 2024.
- [10] Bilal Chughtai, Lawrence Chan, and Neel Nanda. Neural networks learn representation theory: Reverse engineering how networks perform group operations. In *ICLR 2023 Workshop on Physics for Machine Learning*, 2023.
- [11] Alethea Power, Yuri Burda, Harri Edwards, Igor Babuschkin, and Vedant Misra. Grokking: Generalization beyond overfitting on small algorithmic datasets, 2022. URL <https://arxiv.org/abs/2201.02177>.
- [12] Mohamad Amin Mohamadi, Zhiyuan Li, Lei Wu, and Danica Sutherland. Grokking modular arithmetic can be explained by margin maximization. In *NeurIPS 2023 Workshop on Mathematics of Modern Machine Learning*, 2023. URL <https://openreview.net/forum?id=QPMfCLnIqf>.
- [13] Lee Sharkey, Bilal Chughtai, Joshua Batson, Jack Lindsey, Jeff Wu, Lucius Bushnaq, Nicholas Goldowsky-Dill, Stefan Heimersheim, Alejandro Ortega, Joseph Bloom, Stella Biderman, Adria Garriga-Alonso, Arthur Conmy, Neel Nanda, Jessica Rumbelow, Martin Wattenberg, Nandi Schoots, Joseph Miller, Eric J. Michaud, Stephen Casper, Max Tegmark, William Saunders, David Bau, Eric Todd, Atticus Geiger, Mor Geva, Jesse Hoogland, Daniel Murfet, and Tom McGrath. Open problems in mechanistic interpretability, 2025. URL <https://arxiv.org/abs/2501.16496>.
- [14] Nick Cammarata, Shan Carter, Gabriel Goh, Chris Olah, Michael Petrov, Ludwig Schubert, Chelsea Voss, Ben Egan, and Swee Kiat Lim. Thread: Circuits. *Distill*, 2020. doi: 10.23915/distill.00024. <https://distill.pub/2020/circuits>.
- [15] Nelson Elhage, Neel Nanda, Catherine Olsson, Tom Henighan, Nicholas Joseph, Ben Mann, Amanda Askell, Yuntao Bai, Anna Chen, Tom Conerly, Nova DasSarma, Dawn Drain, Deep Ganguli, Zac Hatfield-Dodds, Danny Hernandez, Andy Jones, Jackson Kernion, Liane Lovitt, Kamal Ndousse, Dario Amodei, Tom Brown, Jack Clark, Jared Kaplan, Sam McCandlish, and

- 370 Chris Olah. A mathematical framework for transformer circuits. *Transformer Circuits Thread*,  
371 2021. <https://transformer-circuits.pub/2021/framework/index.html>.
- 372 [16] Catherine Olsson, Nelson Elhage, Neel Nanda, Nicholas Joseph, Nova DasSarma, Tom  
373 Henighan, Ben Mann, Amanda Askell, Yuntao Bai, Anna Chen, Tom Conerly, Dawn Drain,  
374 Deep Ganguli, Zac Hatfield-Dodds, Danny Hernandez, Scott Johnston, Andy Jones, Jackson  
375 Kernion, Liane Lovitt, Kamal Ndousse, Dario Amodei, Tom Brown, Jack Clark, Jared Kaplan,  
376 Sam McCandlish, and Chris Olah. In-context learning and induction heads. *Transformer*  
377 *Circuits Thread*, 2022. [https://transformer-circuits.pub/2022/in-context-learning-and-induction-](https://transformer-circuits.pub/2022/in-context-learning-and-induction-heads/index.html)  
378 [heads/index.html](https://transformer-circuits.pub/2022/in-context-learning-and-induction-heads/index.html).
- 379 [17] Nelson Elhage, Tristan Hume, Catherine Olsson, Nicholas Schiefer, Tom Henighan, Shauna  
380 Kravec, Zac Hatfield-Dodds, Robert Lasenby, Dawn Drain, Carol Chen, et al. Toy models of  
381 superposition. *arXiv preprint arXiv:2209.10652*, 2022.
- 382 [18] D Marr and T Poggio. From understanding computation to understanding neural circuitry.  
383 *Neuroscience Research Program Bulletin*, 15(3):470–488, 1979.
- 384 [19] Jessica Hamrick and Shakir Mohamed. Levels of analysis for machine learning. *arXiv preprint*  
385 *arXiv:2004.05107*, 2020.
- 386 [20] Zhonghao He, Jascha Achterberg, Katie Collins, Kevin Nejad, Danyal Akarca, Yinzhu Yang,  
387 Wes Gurnee, Ilia Sucholutsky, Yuhan Tang, Rebeca Ianov, et al. Multilevel interpretability  
388 of artificial neural networks: Leveraging framework and methods from neuroscience. *arXiv*  
389 *preprint arXiv:2408.12664*, 2024.
- 390 [21] Martina G. Vilas, Federico Adolphi, David Poeppel, and Gemma Roig. Position: An inner  
391 interpretability framework for AI inspired by lessons from cognitive neuroscience. In *Forty-first*  
392 *International Conference on Machine Learning*, 2024. URL [https://openreview.net/](https://openreview.net/forum?id=66KmnMhGU5)  
393 [forum?id=66KmnMhGU5](https://openreview.net/forum?id=66KmnMhGU5).
- 394 [22] Emily Wenger, Mingjie Chen, François Charton, and Kristin Lauter. Salsa: Attacking lattice  
395 cryptography with transformers, 2023. URL <https://arxiv.org/abs/2207.04785>.
- 396 [23] Ziming Liu, Ouail Kitouni, Niklas S Nolte, Eric Michaud, Max Tegmark, and Mike Williams.  
397 Towards understanding grokking: An effective theory of representation learning. *Advances in*  
398 *Neural Information Processing Systems*, 35:34651–34663, 2022.
- 399 [24] Darshil Doshi, Aritra Das, Tianyu He, and Andrey Gromov. To grok or not to grok: Disen-  
400 tangling generalization and memorization on corrupted algorithmic datasets. *arXiv preprint*  
401 *arXiv:2310.13061*, 2023.
- 402 [25] Neil Mallinar, Daniel Beaglehole, Libin Zhu, Adityanarayanan Radhakrishnan, Parthe Pandit,  
403 and Mikhail Belkin. Emergence in non-neural models: grokking modular arithmetic via average  
404 gradient outer product, 2024. URL <https://arxiv.org/abs/2407.20199>.
- 405 [26] Hiroki Furuta, Gouki Minegishi, Yusuke Iwasawa, and Yutaka Matsuo. Towards empirical  
406 interpretation of internal circuits and properties in grokked transformers on modular polynomials,  
407 2024. URL <https://arxiv.org/abs/2402.16726>.
- 408 [27] Kaifeng Lyu, Jikai Jin, Zhiyuan Li, Simon S. Du, Jason D. Lee, and Wei Hu. Dichotomy  
409 of early and late phase implicit biases can provably induce grokking, 2024. URL <https://arxiv.org/abs/2311.18817>.
- 410 [28] Tanishq Kumar, Blake Bordelon, Samuel J. Gershman, and Cengiz Pehlevan. Grokking as the  
411 transition from lazy to rich training dynamics, 2024. URL <https://arxiv.org/abs/2310.06110>.
- 412 [29] Darshil Doshi, Tianyu He, Aritra Das, and Andrey Gromov. Grokking modular polynomials.  
413 *arXiv preprint arXiv:2406.03495*, 2024.
- 414 [30] Tianyu He, Darshil Doshi, Aritra Das, and Andrey Gromov. Learning to grok: Emergence  
415 of in-context learning and skill composition in modular arithmetic tasks. *arXiv preprint*  
416 *arXiv:2406.02550*, 2024.

- 419 [31] Ezra Edelman, Nikolaos Tsilivis, Benjamin Edelman, Eran Malach, and Surbhi Goel. The  
420 evolution of statistical induction heads: In-context learning markov chains. *Advances in Neural*  
421 *Information Processing Systems*, 37:64273–64311, 2024.
- 422 [32] François Charton and Julia Kempe. Emergent properties with repeated examples. *arXiv preprint*  
423 *arXiv:2410.07041*, 2024.
- 424 [33] Nayoung Lee, Ziyang Cai, Avi Schwarzschild, Kangwook Lee, and Dimitris Papailiopoulos.  
425 Self-improving transformers overcome easy-to-hard and length generalization challenges. *arXiv*  
426 *preprint arXiv:2502.01612*, 2025.
- 427 [34] Samy Jelassi, Stéphane d’Ascoli, Carles Domingo-Enrich, Yuhuai Wu, Yuezhi Li, and François  
428 Charton. Length generalization in arithmetic transformers. *arXiv preprint arXiv:2306.15400*,  
429 2023.
- 430 [35] François Charton. Learning the greatest common divisor: explaining transformer predictions,  
431 2024. URL <https://arxiv.org/abs/2308.15594>.
- 432 [36] Alhussein Fawzi, Matej Balog, Aja Huang, Thomas Hubert, Bernardino Romera-Paredes,  
433 Mohammadamin Barekatain, Alexander Novikov, Francisco J R. Ruiz, Julian Schrittwieser,  
434 Grzegorz Swirszcz, et al. Discovering faster matrix multiplication algorithms with reinforcement  
435 learning. *Nature*, 610(7930):47–53, 2022.
- 436 [37] Daniel J Mankowitz, Andrea Michi, Anton Zhernov, Marco Gelmi, Marco Selvi, Cosmin  
437 Paduraru, Edouard Leurent, Shariq Iqbal, Jean-Baptiste Lespiau, Alex Ahern, et al. Faster  
438 sorting algorithms discovered using deep reinforcement learning. *Nature*, 618(7964):257–263,  
439 2023.
- 440 [38] Gavin McCracken. *Using Exact Models to Analyze Policy Gradient Algorithms*. McGill  
441 University (Canada), 2021.
- 442 [39] Maithra Raghu, Alex Irpan, Jacob Andreas, Bobby Kleinberg, Quoc Le, and Jon Kleinberg. Can  
443 deep reinforcement learning solve erdos-selfridge-spencer games? In *International Conference*  
444 *on Machine Learning*, pages 4238–4246. PMLR, 2018.
- 445 [40] Diederik P. Kingma and Jimmy Ba. Adam: A method for stochastic optimization, 2017. URL  
446 <https://arxiv.org/abs/1412.6980>.



## 447 Table of Contents for the Appendix

|     |                                                                                                       |    |
|-----|-------------------------------------------------------------------------------------------------------|----|
| 448 | A. Additional Background .....                                                                        | 13 |
| 449 | A.1. Conceptual Background and Additional Related Work .....                                          | 13 |
| 450 | A.2. Additional Mathematical Background .....                                                         | 15 |
| 451 | A.2.1. Examples: cosets, Cayley graphs, step size $d$ .....                                           | 18 |
| 452 | B. Proof of Theorem 4.4 .....                                                                         | 19 |
| 453 | C. Proofs and details for Theorem 4.7 and Corollary 4.8 .....                                         | 20 |
| 454 | D. Embeddings contain projections of representations, not representations .....                       | 22 |
| 455 | E. Main-body Experimental Details .....                                                               | 23 |
| 456 | E.1. Figure 1: simple neurons and remapped simple neurons .....                                       | 24 |
| 457 | E.2. Figure 2: approximate cosets in cayley graphs, cosines and remapped cosines .....                | 24 |
| 458 | E.3. Figure 3: scaling moduli gives $\mathcal{O}(\log(n))$ frequency growth rate .....                | 24 |
| 459 | E.4. Figure 4: showing average # frequencies found in MLPs .....                                      | 25 |
| 460 | E.5. Figure 5: clusters of simple neurons & $R^2$ for scaling widths in architectures .....           | 25 |
| 461 | E.6. Figure 6: $R^2$ vs hyperparameters vs depth in MLPs .....                                        | 26 |
| 462 | E.7. Figure 7: $R^2$ vs hyperparameters vs depth in pizzas & clocks .....                             | 26 |
| 463 | E.8. Figure 8: the % neurons that are simple in deeper layers varies .....                            | 27 |
| 464 | E.9. Figure 9: networks are biased to learn cosets over approximate cosets .....                      | 27 |
| 465 | F. Further Experimental Results .....                                                                 | 27 |
| 466 | F.1. Goodness of Fit of the Single Sinusoidal Approximation .....                                     | 27 |
| 467 | G. Additional Experiments We Didn't Put in the Main Text .....                                        | 27 |
| 468 | G.1. Principal Component Analyses (PCA) of embeddings .....                                           | 27 |
| 469 | G.2. More examples of simple neurons .....                                                            | 32 |
| 470 | G.3. Studying phase shifts in simple neurons .....                                                    | 32 |
| 471 | G.4. Studying fine-tuning neurons .....                                                               | 34 |
| 472 | G.5. Histograms of frequencies associated with fine-tuning neurons .....                              | 37 |
| 473 | G.6. Fine-tuning neurons like additive and subtractive relations .....                                | 41 |
| 474 | G.7. Histograms of counts of frequencies being learned in mod59 and mod66 across varying depths ..... | 41 |
| 475 | G.8. Noise and ablation studies .....                                                                 | 43 |
| 476 | G.9. Number of frequencies .....                                                                      | 46 |
| 477 | G.10. Qualitative: equivariance of the cluster contributions to logits .....                          | 49 |
| 478 | G.10.1. Pizza model .....                                                                             | 51 |
| 479 | G.10.2. Clock model .....                                                                             | 52 |
| 480 |                                                                                                       |    |

## 481 A Additional Background

### 482 A.1 Conceptual Background and Additional Related Work

483 This appendix expands on the conceptual foundations and related work that motivated our approach.  
484 We first review key debates in mechanistic interpretability—particularly around universality and  
485 abstraction—before turning to mathematical tasks as ideal testbeds for studying learned structure.

#### 486 Mechanistic Interpretability, Universality and Levels of Abstraction.

487 Mechanistic interpretability seeks to reverse-engineer trained neural networks by identifying the  
488 roles of individual components—such as neurons, attention heads, or MLP weights—in the model's  
489 learned function [13]. It aims to explain *how* models arrive at their outputs by analyzing the specific  
490 components and pathways involved in their internal computations. A central focus of this paradigm is  
491 on **circuits** [1, 14, 15]: small groups of components (essentially a subnetwork) that together perform  
492 a recognizable subtask such as copying, induction or composition [16]. Over time, researchers

493 have identified recurring patterns in these circuits—known as **motifs**—such as superposition [17]  
 494 (where multiple features share the same subspace), equivariance (where computations respect certain  
 495 transformations) or unioning over cases (where a unit activates for multiple distinct patterns without  
 496 distinguishing between them). These recurring motifs offer generalizable insight into how networks  
 497 compute [1].

498 A central idea in mechanistic interpretability is **universality**—the informal hypothesis that indepen-  
 499 dently trained neural networks tend to develop *similar internal structures* [2, 1]. The appeal is clear:  
 500 if models trained in different conditions all learn the same solution, then interpreting one model  
 501 could offer insight into many. However, what “similar” means in this context has often gone unstated.  
 502 Universality might refer to alignment in learned features, to similarity in neuron roles or circuits, or  
 503 to shared algorithmic structure—but these possibilities are rarely distinguished. At the same time,  
 504 empirical findings are mixed: while some studies report that representations in vision and language  
 505 models become increasingly aligned as model scale increases [3], others show divergences in learned  
 506 mechanisms even on simple algorithmic/mathematical tasks [5, 9]. Together, these findings highlight  
 507 a deeper issue: the field lacks a clear definition of *what kind of structure* should be expected to be  
 508 universal—and *at what level of abstraction* such universality should be evaluated.

509 A major challenge in this area is the ambiguity of the term circuit, which can refer to anything  
 510 from small neuron clusters to nearly full-network subnetworks. This flexibility enables compelling  
 511 case studies, but hinders comparisons across scales. In early interpretability work, [4] introduced  
 512 the *Fourier Multiplication Algorithm* (later called the Clock), showing that transformers trained on  
 513 modular addition learned to represent inputs on circles and perform angle addition via attention.  
 514 Chughtai et al. [8] proposed a broader generalization—the Group Composition via Representations  
 515 (GCR) algorithm—suggesting a universal algorithm for group tasks based on multiplying group  
 516 representations. In both cases, the term “algorithm” referred to the local computation implemented  
 517 by a circuit defined over a specific Fourier frequency or irreducible representation (irrep). However,  
 518 later work challenged the universality of these circuit-level “algorithms”. Zhong et al. [5] found that  
 519 different training settings could induce qualitatively different frequency-specific circuits (e.g., the  
 520 Pizza circuit), and showed that multiple distinct frequency-based circuits could coexist within the  
 521 same model. Stander et al. [9] analyzed models trained on  $S_n$  and found coset-based circuits—rather  
 522 than irrep-based implementations of GCR—further undermining its algorithmic universality claim.  
 523 These results suggest that even when models solve the same task, they may not implement the same  
 524 algorithm *at the circuit level*. Our work shifts perspective. We define a model’s algorithm as a  
 525 global computational strategy realized across the full network. To uncover this, we take a multiscale  
 526 approach—analyzing the behavior of individual neurons, how frequency-aligned clusters of neurons  
 527 work together, and how these clusters interact to form a coherent global solution. Our simple neuron  
 528 model helps reconcile prior findings by showing that seemingly different circuit behaviors can be  
 529 well-approximated within a unified functional form. At the cluster level, we have coset computations.  
 530 At the full-network level, we identify a consistent solution that emerges across architectures and  
 531 training runs: a universal abstract algorithm, formalized as an approximate version of the Chinese  
 532 Remainder Theorem (aCRT). This perspective explains how models can converge to the same high-  
 533 level structure even when their lower-level mechanisms diverge. Unlike prior analyses focused on  
 534 isolated subcircuits, we sought to understand how computation emerges across scales—from individual  
 535 neurons to full-model solutions—and show that models can share the same network-level algorithmic  
 536 structure despite mechanistic variability.

537 Much of the confusion around universality stems from comparing models without distinguishing  
 538 between different **levels of abstraction**. Recent work has proposed frameworks from cognitive  
 539 science—especially Marr’s levels of analysis [18–21]—as useful tools in interpretability, helping  
 540 clarify what kind of explanations are being offered. Marr distinguishes between (1) the computational  
 541 level (what problem is solved), (2) the algorithmic level (how it is solved), and (3) the implemen-  
 542 tational level (how it is physically realized). Although not developed for studying universality and  
 543 not formally used in our main analysis, we find these ideas helpful as a retrospective lens—both for  
 544 understanding why prior analyses disagreed—and for identifying common structure where others  
 545 saw divergence. For example, Vilas et al. [21] propose looking for invariances across levels and  
 546 enforcing mutual constraints between levels as guiding principles. Our approach reflects both: we  
 547 uncover a consistent computational-level (in the sense of Marr’s levels) solution, the aCRT, that  
 548 unifies divergent circuit-level behaviors and reveals a form of universality that holds at a more abstract  
 549 level than previously recognized—what we refer to as the universal abstract algorithm.

## Mathematical and Algorithmic Tasks as Interpretable Testbeds for Machine Learning.

Mathematical and algorithmic tasks—such as modular addition, group operations, sorting, and Markov chains—have become valuable testbeds for studying machine learning systems. Their appeal lies in their formal structure: these problems have been studied for centuries, with well-understood properties. Because the task structure is fully known, optimal solutions are analyzable and generalization behavior can be sharply characterized—unlike in typical natural data settings. This makes them ideal environments for probing what neural networks learn and how. While primarily used to study model internals, these tasks also have practical relevance; for example, transformers trained on modular arithmetic have been applied to attack lattice-based cryptographic schemes [22].

These tasks have been central to studying grokking, the phenomenon where models generalize abruptly after a period of overfitting [11]. Using modular addition as a testbed, researchers have linked grokking to structured internal representations [23, 6], margin maximization [12, 7], label corruption [24], and non-neural architectures [25], or how distinct circuits emerge during grokking for different modular arithmetic tasks [26]. Other work has connected grokking to training phase transitions, such as shifts between lazy and rich regimes in modular addition [27] and polynomial regression [28]. Several papers also provide exact analytical constructions of specific network weights: one-layer, one-hot encoded networks with quadratic activations solving modular addition [6, 7], and ReLU networks solving modular multiplication for modeling grokked solutions in modular polynomials [29].

Beyond grokking, mathematical tasks have helped probe generalization, learning dynamics, and in-context learning. Modular addition and Markov chains have served as controlled environments for studying how transformers acquire in-context learning capabilities [30, 31]. Other work has shown that repeating training examples affects generalization in tasks like greatest common divisor (GCD), modular multiplication, and matrix eigenvalue prediction [32], and that arithmetic tasks shed light on how transformers handle length generalization [33, 34]. In the GCD setting specifically, models appear to select from a small, learned set of candidate divisors [35].

While most research in this area focuses on supervised learning, some work investigates how reinforcement learning (RL) agents operate in mathematical environments. Agents trained on tasks like matrix multiplication or sorting have been observed to discover novel, interpretable algorithms [36, 37]. Other work leverages group-theoretic structure to enable exact analysis: environments built using the temporal symmetries of affine Weyl groups allow analytical characterization of the policy gradient landscape, yielding closed-form gradient dynamics and local optima and providing insight into how exploration difficulty affects learning [38]. Similarly, interpretable RL environments based on Erdos-Selfridge-Spencer games have been developed, with exact optimal strategies and tunable difficulty controlled by human-interpretable environment parameters [39].

Together, this body of work establishes mathematical tasks as invaluable tools for interpretability. Their known structure enables precise analysis of learned behavior, supports abstraction-driven explanations, and provides testbeds where claims about generalization and universality can be rigorously evaluated.

## A.2 Additional Mathematical Background

This section provides formal definitions and examples of the group-theoretic structures that underlie our analysis of modular addition networks: groups, cosets, Cayley graphs, group representations, and the Chinese Remainder Theorem (CRT). These definitions support the structures described in the main text: simple neurons, approximate cosets and the approximate CRT algorithm we identify in trained networks.

### Groups, Subgroups and Cosets.

**Definition A.1** (Group). A **group**  $(G, \circ)$  consists of a set  $G$  equipped with a binary operation  $\circ : G \times G \rightarrow G$  satisfying:

1. **Associativity:**  $(f \circ g) \circ h = f \circ (g \circ h)$  for all  $f, g, h \in G$ .
2. **Identity:** There exists an element  $e \in G$  such that  $e \circ g = g \circ e = g$  for all  $g \in G$ .
3. **Inverses:** For each  $g \in G$ , there exists  $g^{-1} \in G$  such that  $g \circ g^{-1} = e$ .

601 **Definition A.2** (Subgroup). A subset  $H \subseteq G$  is a **subgroup** if it is itself a group under the same  
602 operation  $\circ$ . That is,  $H$  must contain the identity, be closed under the operation, and contain inverses  
603 of its elements.

604 Subgroups induce a natural partitioning of the group via *cosets*, which are key to understanding  
605 modular structure and factorization.

606 **Definition A.3** (Cosets). Let  $H$  be a subgroup of  $G$ , and let  $g \in G$ . The **left coset** of  $H$  with  
607 representative  $g$  is:

$$gH = \{g \circ h : h \in H\}.$$

608 Right cosets are defined similarly:  $Hg = \{h \circ g : h \in H\}$ . Cosets partition  $G$  into disjoint, equally  
609 sized subsets.

610 **Example A.4** (Integers and Even/Odd Cosets). The set  $(\mathbb{Z}, +)$  is a group. The identity is 0; the  
611 inverse of  $n$  is  $-n$ . The even integers  $2\mathbb{Z}$  form a subgroup. This gives two cosets:

$$2\mathbb{Z} = \{\dots, -2, 0, 2, \dots\}, \quad 1 + 2\mathbb{Z} = \{\dots, -1, 1, 3, \dots\}.$$

612 These correspond to the even and odd integers — a familiar example of partitioning via cosets.

613 **Definition A.5** (Homomorphism). A map  $\psi : G \rightarrow H$  between groups is a **homomorphism** if it  
614 preserves the group operation:

$$\psi(g_1 \circ_G g_2) = \psi(g_1) \circ_H \psi(g_2), \quad \text{for all } g_1, g_2 \in G.$$

615 If  $\psi$  is also bijective, it is called a **group isomorphism**.

616 Homomorphisms are the natural notion of "structure-preserving" maps between groups.

## 617 **Cyclic Groups and Modular Arithmetic.**

618 In this paper, we focus on modular addition, which forms the cyclic group.

619 **Definition A.6** (Cyclic Group  $C_n$ ). The **cyclic group of order**  $n$ , denoted  $C_n$  or  $\mathbb{Z}_n$ , is the set  
620  $\{0, 1, \dots, n-1\}$  equipped with addition modulo  $n$ . The group operation is defined by

$$a \circ b = (a + b) \mod n,$$

621 with identity element 0 and inverses given by  $a^{-1} = (n - a) \mod n$ .

622 Subgroups of  $C_n$  correspond to evenly spaced subsets, and their cosets partition  $C_n$  into congruence  
623 classes modulo a divisor of  $n$ .

624 **Example A.7** (Cosets mod 4 in  $\mathbb{Z}_8$ ). Let  $n = 8$ , and consider the subgroup  $H = \{0, 4\}$ . The left  
625 cosets are:

$$0 + H = \{0, 4\}, \quad 1 + H = \{1, 5\}, \quad 2 + H = \{2, 6\}, \quad 3 + H = \{3, 7\}.$$

626 This partitions  $\mathbb{Z}_8$  into four disjoint cosets of size 2.

627 **Definition A.8** (Modular Inverse). Let  $a \in \mathbb{Z}_n$ . The **modular inverse** of  $a$  is an element  $b \in \mathbb{Z}_n$   
628 such that

$$a \cdot b \equiv 1 \mod n.$$

629 A modular inverse exists if and only if  $\gcd(a, n) = 1$ , i.e.,  $a$  and  $n$  are coprime.

## 630 **The Chinese Remainder Theorem.**

631 The Chinese Remainder Theorem (CRT) gives a powerful way to decompose modular arithmetic  
632 over a large modulus into multiple, independent modular systems over smaller, coprime moduli. This  
633 decomposition mirrors the modular structure learned by networks trained on addition tasks, and it is  
634 central to our concept of the *approximate CRT*.

635 **Theorem A.9** (Chinese Remainder Theorem). Let  $n = q_1 q_2 \cdots q_k$  be a product of pairwise coprime  
636 integers. Then the map

$$\phi : \mathbb{Z}_n \rightarrow \mathbb{Z}_{q_1} \times \cdots \times \mathbb{Z}_{q_k}, \quad x \mapsto (x \mod q_1, \dots, x \mod q_k)$$

637 is a group isomorphism. That is, each element in  $\mathbb{Z}_n$  corresponds uniquely to a tuple of residues  
638 modulo the  $q_i$ , and vice versa.

639 **Example A.10** (Coset Intersection View). Let  $n = 91 = 7 \cdot 13$ . Suppose we want to solve:

$$x \equiv 3 \pmod{7}, \quad x \equiv 10 \pmod{13}.$$

640 Each congruence defines a coset:

$$\begin{aligned} x \equiv 3 \pmod{7} &\Rightarrow \{3, 10, 17, 24, 31, \dots\}, \\ x \equiv 10 \pmod{13} &\Rightarrow \{10, 23, 36, 49, \dots\}. \end{aligned}$$

641 The unique solution mod 91 is the number common to both cosets:  $\boxed{10}$ .

## 642 Cayley Graphs.

643 **Definition A.11** (Generating Set). Let  $G$  be a group. A subset  $S \subseteq G$  is called a **generating set** of  
644  $G$  if every element  $g \in G$  can be written as a finite product of elements from  $S$  and their inverses.  
645 That is, for all  $g \in G$ , there exist  $s_1, \dots, s_k \in S$  and signs  $\epsilon_i \in \{-1, 1\}$  such that:

$$g = s_1^{\epsilon_1} s_2^{\epsilon_2} \cdots s_k^{\epsilon_k}.$$

646 **Example A.12** (Generating Sets in  $\mathbb{Z}_6$ ). The group  $\mathbb{Z}_6 = \{0, 1, 2, 3, 4, 5\}$  under addition mod 6 can  
647 be:

- 648 • Generated by  $\{1\}$ , since repeated addition gives all elements:  $1, 2, \dots, 5, 0$ .
- 649 • Generated by  $\{5\}$ , since  $5 + 5 = 10 \equiv 4 \pmod{6}$ , and so on.
- 650 • Not generated by  $\{2\}$ , since  $2 + 2 = 4, 4 + 2 = 0$ , and the subgroup  $\{0, 2, 4\}$  is too small.

651 **Definition A.13** (Cayley Graph). Let  $G$  be a group and let  $S \subseteq G$  be any subset (not necessarily a  
652 generating set). The **Cayley graph**  $\Gamma(G, S)$  is a directed graph with one vertex for each element of  
653  $G$ , and a directed edge from  $g$  to  $g \cdot s$  for every  $s \in S$ .

654 If  $S$  is symmetric (i.e.,  $s \in S \Rightarrow s^{-1} \in S$ ), then the graph is often treated as undirected. The graph  
655 is:

- 656 • **Connected** if and only if  $S$  generates  $G$ .
- 657 • **Disconnected** if  $S$  generates a proper subgroup of  $G$ .

658 **Example A.14** (Cayley Graphs in  $\mathbb{Z}_6$ ). Let  $G = \mathbb{Z}_6 = \{0, 1, 2, 3, 4, 5\}$  under addition mod 6.

- 659 • Using  $S = \{1\}$ , the graph connects:

$$0 \rightarrow 1 \rightarrow 2 \rightarrow 3 \rightarrow 4 \rightarrow 5 \rightarrow 0$$

660 forming a connected 6-cycle. Here,  $S = \{1\}$  is a generating set.

- 661 • Using  $S = \{2\}$ , we only get:

$$0 \rightarrow 2 \rightarrow 4 \rightarrow 0, \quad 1 \rightarrow 3 \rightarrow 5 \rightarrow 1$$

662 which are two disconnected 3-cycles. This reflects the subgroup  $\{0, 2, 4\}$  and its coset  
663  $\{1, 3, 5\}$ . The set  $S = \{2\}$  does *not* generate  $\mathbb{Z}_6$ , and the graph is *disconnected*.

## 664 Group representations and the Discrete Fourier Transform (DFT)

665 **Definition A.15** (Group representation). A **representation** of a group  $G$  on a vector space  $V$  is a  
666 homomorphism  $\rho : G \rightarrow \text{GL}(V)$ , where  $\text{GL}(V)$  is the group of invertible linear maps on  $V$ .

667 **Example A.16** (Discrete Fourier Transform). The **discrete Fourier transform (DFT)** comes from  
668 the complex representations of the cyclic group  $C_n$ . Each element  $j \in C_n$  is mapped to the complex  
669 number  $\exp\left(2\pi i \frac{kj}{n}\right)$  for integer  $k \in \{0, 1, \dots, n-1\}$ , encoding modular structure as rotations in the  
670 complex plane. These complex representations correspond to the DFT. They also induce real-valued  
671 representations as 2D rotation matrices acting on  $(\cos, \sin)$  components.

### 672 A.2.1 Examples: cosets, Cayley graphs, step size $d$

673 In the background (Section 3) we gave examples of cosets on  $C_6$ . In this section we will show  
 674 these examples visually to help the reader better understand approximate cosets, generating Cayley  
 675 graphs, and labeling the vertices on them with the step size (Definition 4.1). Recall, the step size:  
 676  $d := (\frac{f}{\gcd(f,n)})^{-1}(\text{mod } \frac{n}{\gcd(f,n)})$ , where the modular inverse is used. There are  $n' = \frac{n}{\gcd(f,n)}$   
 677 distinct positions reachable in this way, thus we could write:  $d := (\frac{f}{\gcd(f,n)})^{-1}(\text{mod } n')$ . Note:  $d$  is  
 678 the step size in the graph  $C_{n'}$ .

679 We consider the cyclic group on 6 elements,  $C_6$ . In this example, we will show how cosines of  
 680 different frequencies encode coset information and how we can construct the corresponding Cayley  
 681 graphs from this. Since  $n = 6$ , then  $\lfloor \frac{6}{2} \rfloor = 3$ , and we have 3 possible frequencies  $f = 1, 2, 3$   
 682 for  $\cos\left(\frac{2\pi \cdot f \cdot a}{6}\right)$  across  $a \in C_6$ . These three cosines will each step around  $C_6$  in different ways,  
 683 depending on  $f$ .

684 If  $f = 1$ , our cosine is  $\cos\left(\frac{2\pi \cdot 1 \cdot a}{6}\right)$ . We compute  $n' = 6$ , thus there are 6 elements we can reach in  
 685  $C_6$ . This gives 6 cosets of size 1:

$$\{0\}, \{1\}, \{2\}, \{3\}, \{4\}, \{5\}.$$

686 If  $f = 2$ , our cosine is  $\cos\left(\frac{2\pi \cdot 2 \cdot a}{6}\right)$ . We compute  $n' = 3$ , thus we're in  $C_3$ , which has 3 elements.  
 687 This gives 3 cosets, each of size 2, corresponding to three different 2-cycles in the original  $C_6$  graph,  
 688 but where each coset is now a point in our new graph for  $C_{n'} = C_3$ :

$$\{0, 3\}, \{1, 4\}, \{2, 5\}.$$

689 If  $f = 3$ , our cosine is  $\cos\left(\frac{2\pi \cdot 3 \cdot a}{6}\right)$ . We compute  $n' = 2$ , thus we're in  $C_2$ , which has 2 elements.  
 690 This gives 2 cosets, each of size 3, corresponding to two different 3-cycles in the original  $C_6$  graph,  
 691 but where each coset is now a point in our new graph for  $C_{n'} = C_2$ :

$$\{0, 2, 4\}, \{1, 3, 5\}.$$

692 See these cosines in Figure 10.

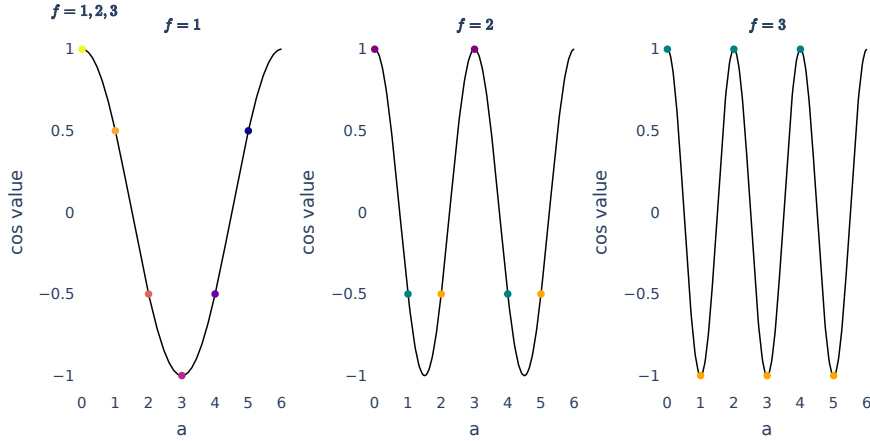

Figure 10: Cosine functions centered at 0, with  $f = 1$ ,  $f = 2$ ,  $f = 3$ . The points are colored based on their coset membership, *i.e.* equivalence class.

693 We can calculate the step size, Definition 4.1, and in all three cases we get  $d = 1$ . We will visualize  
 694 these sets in a figure coming shortly.

695 Row 1 shows the original Cayley graph and row 2 shows the new graph after collapsing cosets. Row  
 696 1 will be the cyclic group on 6 elements,  $C_6$ : in other words, we will not collapse the cosets yet  
 697 into their equivalence classes. This means we aren't making the graphs  $C_{n'}$  and resultantly, we plot  
 698  $C_6$  with distances from the vertices to the first vertex  $a = 0$ . We also show the cosets, the 3-cycles

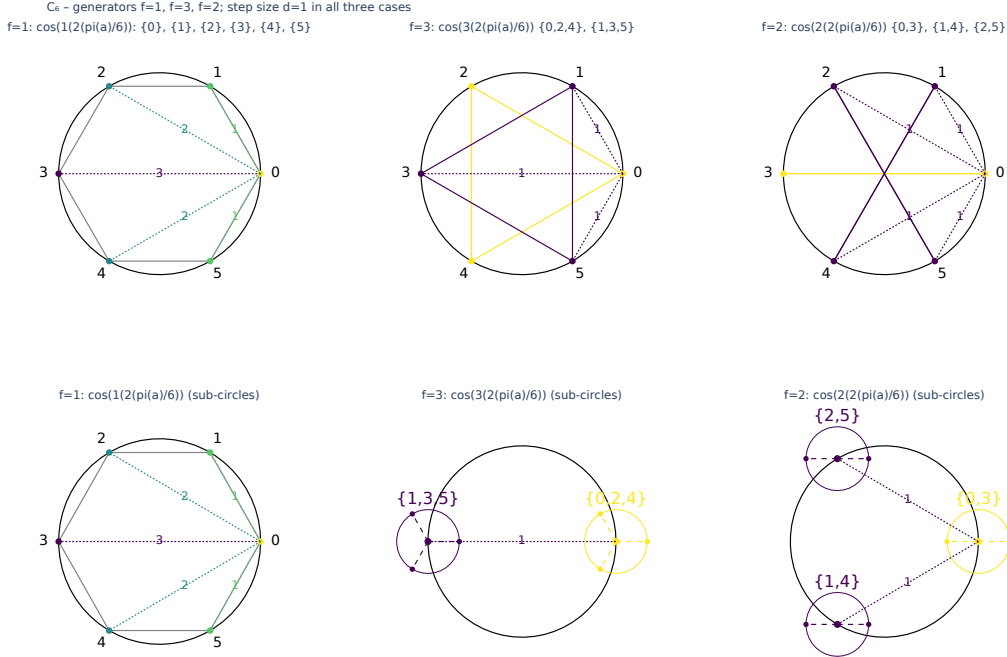

Figure 11: In row 1 we show the Cayley graphs and the distances, which is a bit confusing in panel 3 because we don't collapse the cosets into their equivalence classes. To make it easier to see the distances and where they come from, in row 2 we collapse equivalent points (all points in a coset) into a subcircle. Doing this gives us less points on the graph, giving us  $C_{n'}$ , which is the graph  $d$  is the step size on. It is now easier to see why the distances to approximate cosets are what they are. In row 2 panel 3, we chose to put the two darkly colored cosets on the other side of the circle to emphasize that ReLU is 0 on them.

699 and 2-cycles. In row 2, we present an equivalent picture that makes things clearer: we plot  $C_{n'}$ .  
700 Furthermore, the step size  $d$  is actually the step size in this cyclic group,  $C_{n'}$ , making the distances  
701 easier to see compared to looking at  $C_6$ . By collapsing vertices into their cosets (equivalence classes),  
702 it becomes clear that everything is distance 1 from the yellow coset. We will do this in row 2, giving  
703  $C_6$  corresponding to  $f = 1$ ,  $C_3$  corresponding to  $f = 2$  and  $C_2$  corresponding to  $f = 3$ . See this in  
704 Figure 11.

705 In the case of approximate cosets, nothing changes. Calculate  $n'$ , calculate  $d$ , and step around the  
706 cyclic group  $C_{n'}$  using  $d$ , labeling the distances of elements. To build an approximate coset, for  
707 some multiples  $k_1, k_2$ , take  $k_1$  steps backward and  $k_2$  steps forward. The path is the approximate  
708 coset—all elements that are “close” on the Cayley graph.

## 709 B Proof of Theorem 4.4

710 For empirical evidence supporting this theorem, see fig 2 in the main paper. Every point  $> 0$  is in the  
711 approximate coset colored by viridis colors, with strength of viridis decaying as the point gets farther  
712 from the center element of the approximate coset (an element getting closer to where ReLU won't  
713 activate, means it less bright).

714 In reality, all sinusoidal functions, *i.e.* our simple neuron assumption, will satisfy this theorem. The  
715 simplicity of this proof therefore results from the fact that we came up with a very powerful definition  
716 for approximate cosets that actually reflects what neurons in the network are learning. This proof  
717 requires the assumption that neurons learn periodic functions, and this is why the majority of the  
718 paper was dedicated to empirically proving that simple neurons are indeed learned by networks.

719 *Proof. Simple neurons learn approximate cosets.* A neuron satisfying the simple neuron model  
720 computes a trigonometric function that has its maxima on the elements of a coset or “approximate  
721 coset”. If  $g := \gcd(f, n) > 1$ , the neuron has learned the **coset** of order  $g$  containing  $s_A + s_B$ . More  
722 precisely: writing  $n = n'g$  and  $f = f'g$  for  $g = \gcd(f, n)$ , we can rewrite  $\frac{2\pi f}{n} = \frac{2\pi f'}{n'}$ . So if the  
723 input neurons are at positions  $a$  and  $b$  where  $a \equiv s_A \pmod{n'}$  and  $b \equiv s_B \pmod{n'}$ , then the  
724 activation of the neuron has a maximum:  $\cos \frac{2\pi f(a-s_A)}{n} = \cos \frac{2\pi f(b-s_B)}{n} = 1$ . The neuron points  
725 most strongly to every logit satisfying  $c \equiv s_A + s_B \pmod{n'}$ , because for all such output logits  
726  $\cos \frac{2\pi f(c-s_A-s_B)}{n} = 1$ . We see that the neuron strongly associates elements of  $C_n$  that are congruent  
727 modulo  $n'$ .

728 Whether  $f$  is a divisor of the order  $n$  or not, the neuron will activate on what we defined as an  
729 approximate coset. More precisely, we can ask the following: for  $a \not\equiv s_A \pmod{n'}$ , which values  
730 of  $a$  have the largest activation? We have  $\cos \frac{2\pi f'(a-s_A)}{n'}$  very close to 1 if and only if  $f'(a - s_A)$   
731 is very close to an integer multiple of  $n'$ ; that is, say,  $f'(a - s_A) \equiv m \pmod{n'}$  for some integer  
732  $m$  with small absolute value. Letting  $d$  denote a modular inverse of  $f' \pmod{n}$ , this is equivalent to  
733  $a - s_A \equiv dm \pmod{n'}$ . In other words, by taking  $a = s_A + dm$  for small integers  $m$ , the neuron  
734 will be activated very strongly. Likewise if  $b = s_B + dm'$  for some other small integer  $m'$ . Now this  
735 neuron will point most strongly to  $c \equiv s_A + s_B \pmod{n'}$  as discussed above, but if  $c$  is a small  
736 number of steps of size  $d$  away from  $s_A + s_B$ , it will still have large activation. To summarize: if you  
737 can reach each of  $a, b, c$  via a small number of steps of size  $d$  from  $s_A, s_B, s_A + s_B$ , respectively,  
738 then  $N$  fires strongly on inputs  $a, b$ , and points strongly at  $c$ .

739 After ReLU, it follows that since all neurons output (activate) only on approximate cosets, all neurons  
740 in the following layers activate on linear combinations of approximate cosets (follows from networks  
741 being fully connected, and ReLU only having the potential to make the cosets smaller, i.e. elements  
742 below 0 are cut off).  $\square$

## 743 C Proofs and details for Theorem 4.7 and Corollary 4.8

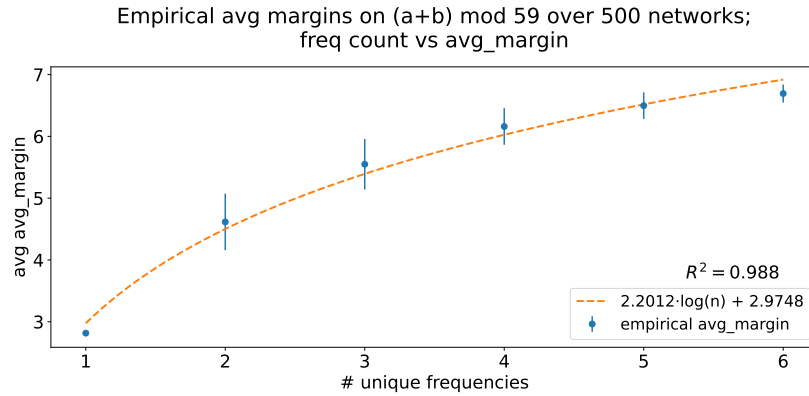

Figure 12: Empirically, 1 hidden layer, 1 trainable embedding matrix, networks have margins grow like  $\mathcal{O}(\log(n))$  as more frequencies are learned. In Corollary 4.8 we prove it. Note: 1 std dev error bars are on  $(x=1, y=2.82)$ ; they are just small, ranging from 2.8-2.84. This plot is made by computing the average margin of each network across the full dataset, given the network had learned  $x = \#$  unique frequencies. The plot shows, for networks that learned the same number of frequencies, the average average margin and the 1 std dev error bars of this data.

744 Assume that training results in neurons learning the simple neuron model.

745 *Proof.* Each simple neuron maximally activates a single output, namely  $s_A + s_B$ , (or possibly  
746 maximally activates on a coset of outputs containing  $s_A + s_B$ ). However, if we combine the  
747 contributions from all simple neurons in a single cluster (i.e. all with the same frequency  $f$ ), we



observe that the activation level can be maximized at any desired output; more precisely, the activation level at output  $k$  given inputs  $i, j$  will be of the form  $A \cos(2\pi(f(k-i-j)/n))$ . Note this has been observed experimentally *e.g.* see Fig 26(a) and Fig. 44, and has also been previously noticed in the literature: see *e.g.* the last equation of Section 3 in [10]. In fact, the analysis below still works even if  $i+j$  is only somewhat close to the maximal activation of the cluster (see Figure 44), though we assume the maximum is at  $i+j$  for simplicity. However, even in this case there will be many output neurons that all activate nearly as strongly on the correct answer. To isolate a single answer, we use a superposition of sine waves of multiple frequencies; we observe experimentally in Figure 44 that this process makes the correct answer stand out from the rest.

In light of the above and Section 4.1, if we fix input neurons  $i, j \in C_n$  then combining the contributions from all clusters (and assuming for the heuristic that the contributions from all clusters have the same amplitude), the sum  $h(k) := \sum_{\ell=1}^m \cos\left(\frac{2\pi f_\ell}{n}(k-i-j)\right)$  gives a model for the activation energy at output logit  $k$ . If  $k = i+j$ , then  $h(k)$  takes on the maximum value  $m$ . If we want to guarantee the neural net will consistently select  $k$ , we need to show that  $h(k)$  is significantly less than  $m$  for all other values of  $k$ . We'll assume a random model where  $m$  frequencies  $f_1, \dots, f_m$  are chosen uniformly at random from  $1, 2, \dots, n-1$ . Fix a parameter  $0 < \delta < 1$ ; we will compute an approximation for the probability that  $m - h(k) > \delta m$  for all  $k \neq i+j \pmod{m}$ .

Let  $\{x\} := x - \lfloor x + \frac{1}{2} \rfloor$  be the signed distance to the nearest integer and set  $d := k - i - j$ . Then using a Taylor expansion,

$$m - h(k) = m - \sum_{\ell=1}^m \cos\left(2\pi \left\{ \frac{f_\ell d}{n} \right\}\right) \approx m - \sum_{\ell=1}^m \left(1 - \frac{1}{2} \left(2\pi \left\{ \frac{f_\ell d}{n} \right\}\right)^2\right) = 2\pi^2 \sum_{\ell=1}^m \left\{ \frac{f_\ell d}{n} \right\}^2.$$

Note that the Taylor approximation is quite bad when  $f_\ell d/n$  is far from an integer, and if  $k$  is close to an integer then  $\{k\}$  is close to 0. It is reasonable to expect that  $m - h(k)$  will be minimized when the values  $f_\ell d/n$  are all close to integers, in which case the approximation is more accurate.

Thus the condition  $m - h(k) > \delta m$  is related to the following condition: defining the vector  $v := \frac{1}{n}(f_1, \dots, f_m) \in [0, 1]^m$ , we need that for all  $1 \leq d \leq n-1$ , the point  $dv$  has distance at least  $\sqrt{\delta m}/2\pi^2$  away from any point in  $\mathbb{Z}^m$ . Note that  $nv$  is an integer point, so  $(n-d)v$  is always the same distance from an integer point as  $dv$  is. Thus it suffices to require  $v$  to be at least  $\frac{1}{d}\sqrt{\delta m}/2\pi^2$  away from a point in  $\frac{1}{d}\mathbb{Z}^m$  for  $d = 1, \dots, \lfloor n/2 \rfloor$ .

We compute an upper bound on the volume of the region to be avoided: that is, the set of all points in  $[0, 1]^m$  within  $\frac{1}{d}\sqrt{\delta m}/2\pi^2$  of a point of  $\frac{1}{d}\mathbb{Z}^m$  for some  $d = 1, \dots, n/2$ . For each  $d$ , there are  $d^m$  points in this region, and each has a ball of radius  $\frac{1}{d}\sqrt{\delta m}/2\pi^2$  around it; the total volume of the region to be avoided is therefore bounded above by  $\frac{n}{2\Gamma(m/2+1)} \left(\frac{\delta m}{2\pi}\right)^{m/2}$ . Thus the probability that  $m - h(k) > \delta m$  is approximately equal to 1 minus this value.

For a given  $n$ , let's compute the value of  $m$  that makes this probability greater than, say,  $\rho$ .

$$1 - \frac{n}{2\Gamma(m/2+1)} \left(\frac{\delta m}{2\pi}\right)^{m/2} > \rho \iff \Gamma(m/2+1) \left(\frac{2\pi}{\delta m}\right)^{m/2} > \frac{n}{2-2\rho}.$$

Taking a natural logarithm, applying Stirling's approximation  $\log_e \Gamma(x+1) \approx x \log_e(x) - x$ , and solving for  $m$ ,

$$\begin{aligned} \log_e \Gamma(m/2+1) + \frac{m}{2} \log_e \left(\frac{2\pi}{\delta m}\right) &> \log_e n - \log_e(2-2\rho) \\ m &> \frac{2 \log_e n - 2 \log_e(2-2\rho)}{\log_e(\pi/\delta) - 1}. \end{aligned}$$

Thus if the number of neuron clusters  $m$  is greater than this expression, then with probability at least  $\rho$ , the separation  $m - h(k)$  will be at least  $\delta m$ . We see that the number grows linearly in  $\log_e n$ .

Choosing the parameters  $\rho$  and  $\delta$  can significantly change the precise value of  $m$  needed, and it's not clear which values most accurately model the true behavior of the neural net. As an example, note that if we take  $\delta = \pi/e^3 \approx 0.1564$ , and  $\rho = \frac{1}{2}$ , then this whole expression simplifies to just

787  $m > \log_e n$ . Thus, if the neural net uses  $m = \log_e n$  neuron clusters, then this heuristic predicts  
 788 that it will guarantee a separation  $m - h(k) > 0.15m$  for all  $k \neq i + j$  with 50% certainty. For  
 789  $n = 89, 91$  we have  $\log_e n \approx 4.5$ , which agrees with the number of clusters found in Figures 40 and  
 790 3. This process can be interpreted as the approximate CRT; see Remark 4.5 for the analogy.  $\square$

### 791 C.1 Proof of Corollary 4.8

792 Recall  $h$  is the model network evaluated at input  $i, j$ ,  $h(k)$  is the value of the output distribution at  $k$   
 793 with maximum value  $h(i + j) = m$  and  $m$  is the number of distinct frequencies simple neurons of  
 794 the network.

795 **Corollary C.1** (Logarithmic number of frequencies suffices for a non-trivial margin). *Let  $0 < \delta < 1$   
 796 and  $0 < \rho < 1$  and define*

$$C(\delta, \rho) = \frac{2}{\log(\pi/\delta) - 1} \left(1 - \frac{1}{2} \log_e(2 - 2\rho)\right) \quad (> 0).$$

797 *If the number  $m$  of simple neurons of the network satisfies*

$$m \geq C(\delta, \rho) \log n$$

798 *then with probability at least  $\rho$*

$$h(i + j) - h(k) > \delta m,$$

799 *i.e. the logit margin is  $\Omega(\log n)$ .*

800 *Proof.* Theorem 4.7 states that the inequality

$$h(i + j) - h(k) > \delta m \tag{*}$$

801 holds for all  $k \neq i + j$  with probability at least  $\rho$  provided

$$m > \frac{2 \log_e n - 2 \log_e(2 - 2\rho)}{\log_e(\pi/\delta) - 1}. \tag{**}$$

802 Choose the constant  $m$  so  $m \geq C(\delta, \rho) \log n$  and inequality (\*\*) both hold.

803 Finally, the guaranteed margin  $\delta m \geq \delta C(\delta, \rho) \log n$  is  $\Omega(\log n)$ , which is strictly larger than the  
 804  $O(1)$  margin attained with only a constant number of frequencies (“minimal margin”).  $\square$

## 805 D Embeddings contain projections of representations, not representations

806 Chughtai et al. [8] discover representation values in the embedding matrix. The first step in their GCR  
 807 algorithm is not true in general. They state, “Translates one-hot  $a, b$  to representation matrices”. We  
 808 provide evidence against this by training with a mini-batch size equal to the modulus  $n$  and training  
 809 with a full batch size. See the difference in the distribution of the resulting embedding matrices in Fig.  
 810 13. Furthermore, neurons in a cluster of frequency  $f$  have different phase shifts, and  $2 \times 2$  rotation  
 811 matrices in the embeddings doesn’t suffice to explain this behaviour.

812 Instead, the values found in the embedding matrix may encode scaled projections of a  $2 \times 2$  rotation  
 813 matrix onto a one dimensional subspace. Note that such structure is implied by the hypothesis that  
 814 neural networks trained on group tasks learn representations, but is more general because of the  
 815 existence of both amplitude and phase shifts. To get an exact equivalence, we note that this neuron  
 816 structure can be obtained by an *arbitrary scaled projection* of representations. Suppose

$$\rho(k) = \begin{pmatrix} \cos(2\pi f k/n) & -\sin(2\pi f k/n) \\ \sin(2\pi f k/n) & \cos(2\pi f k/n) \end{pmatrix}$$

817 is a  $2 \times 2$  matrix representation of  $C_n$ . If we apply  $\rho(k)$  to the vector  $(1, 0)$  and then take the  
 818 dot product with  $(\alpha \cos(2\pi f s_A/n), -\alpha \sin(2\pi f s_A/n))$  (which is the same as projecting onto the  
 819 subspace spanned by this vector and scaling by  $\alpha$ ) we obtain exactly

$$\alpha \cos \frac{2\pi f k}{n} \cos \frac{2\pi f s_A}{n} + \alpha \sin \frac{2\pi f k}{n} \sin \frac{2\pi f s_A}{n} = \alpha \cos \frac{2\pi f(k - s_A)}{n} = \alpha w(A_k, N).$$

Thus we have explained the phase shifts of different neurons in a cluster, and shown that it's not just the components of  $\rho(k)$  that appear in the embeddings, but rather scaled projections of the representations onto arbitrary 1-d subspaces. In our model of simple neurons we ignore the amplitude to make the analysis simpler, but in general it does need to be included. See Fig 28 for example where the amplitudes are greater than 2.

**Inspecting the distribution of embedding matrix weights.** Contrary to findings by [4, 8], we did not observe the  $2 \times 2$  representation matrix values (used to encode rotations) in our embedding matrices outside their reported training conditions. As shown in Fig. 13, the distribution of embedding weights varies significantly between small and full batch size and the tails of the distributions are quite different. In the case of small batch size, numbers can be found in the range  $(-2, 2)$ , whereas large batch size contains numbers between  $(-1.5, 1.5)$ . Note that we choose to remove weights that are between  $(-0.025, 0.025)$  to make it easier to see the tails of the distribution; this was done due to 2.4million weights occurring within this range when training with the small batch size. Specifically, in the small batch size regime, around 5% of the weights fell outside the interval  $[-1, 1]$ , including some weights larger than 2. These values are not consistent with rotation matrix entries. Other than this, we could not identify any significant differences in the core structures of what the neural net learns between the batch sizes.

Combining these experimental findings (Fig. 13) with this model (see D) explains that the embedding matrices may contain scaled projections of representations. This explains the different shifts in the periodic functions that can be seen in Figs 26(a), 26(b) and 24, which GCR [8] fails to explain.

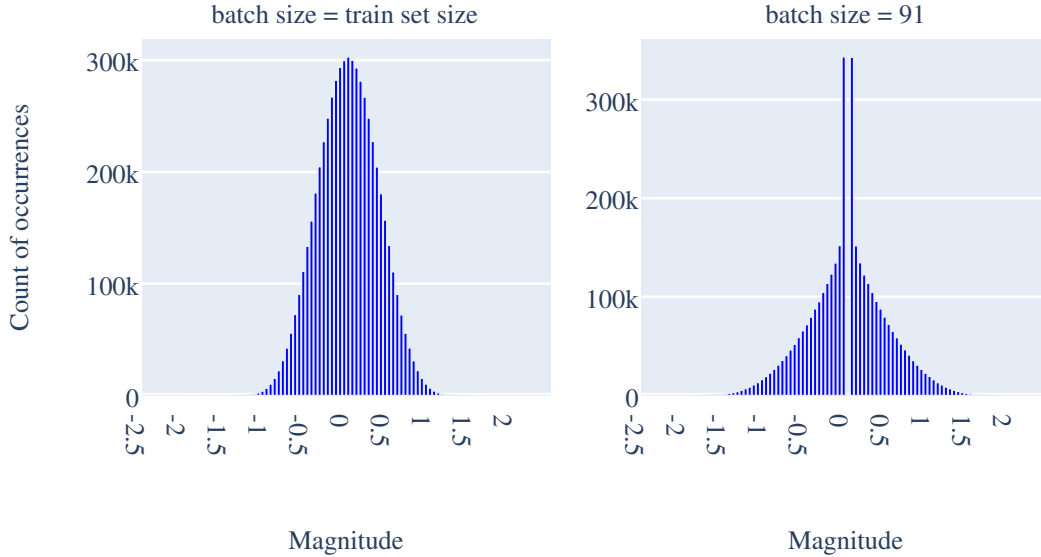

Figure 13: The histograms of embedding weight magnitudes found across 10k random seeds for mod 91 provide evidence against rotation matrices. With batch-size 91 about 5% of the weights are  $> 1$  or  $< -1$ , whereas when the batch size is the training set size fewer than 0.5% of the weights are  $> 1$  or  $< -1$ . The bin with 0 was removed for batch size 91 due to so many dead weights obfuscating the plot. The value was 2.4 mil, implying that small batches find sparse embeddings with larger magnitude weights.

## E Main body experimental details

The train and test splits are 90% and 10% respectively, unless stated otherwise. The optimizer used to update the neural networks weights is always Adam [40].

The only plot with error bars in the main text is Figure 3, which uses 1 standard deviation (std dev) error bars. If a plot has error bars, they are 1 std dev.

## E.1 Figure 1

The point of this figure is to show the reader that qualitatively, neurons are learning sinusoidal functions that are identical after normalization, even when secondary frequencies exist in the Discrete Fourier Transforms. Furthermore, it serves to immediately show the reader that the “remapping: normalizing to frequency 1” definition makes a sinusoidal function have frequency 1. The figure is very easy to generate, just grab arbitrary neurons, plot them, and plot their remapped version. The neuron from the MLP model comes from an MLP with frequency 14. The MLP is one of the MLPs trained on mod 59 for figure 4. The pizza transformer is model A (model\_p99zdpze51.pt checkpoint) and the clock transformer is model B (model\_18k1hzciux.pt checkpoint) from Zhong et al. [5]’s Github repository.

## E.2 Figure 2

This plot shows the simple neuron model, approximate cosets, and Cayley graphs that neurons understand distances on. The point of this figure is to familiarize the reader with our definitions as they are essential to understanding how we derive the abstract aCRT. The code to generate this plot is included in the supplementary materials “make\_figure\_1\_toy\_approx\_cosets.py”.

## E.3 Scaling experiment in Figure 3

We report 1 std dev error bars here, as we do on all our plots, though since our arguments are probabilistic in nature, our growth rate is supposed to be in expectation. We just added the 1 std dev to show the std dev if a normal distribution was fit with the same average. Indeed, the standard deviations are low. For the transformer models (clock and pizza), we take the exact model classes from [5]’s Github repository., and translate them into Jax. For clocks, the attention coefficient is set to 1.0 and for pizzas, the attention coefficient is set to 0.0. The  $d_{\text{model}}$  is always taken to be the smallest power of 2 that is larger than  $n$ , because the architecture requires it. The number of heads is always 4, and the  $d_{\text{head}}$  is such that 4 times that number is equal to the  $d_{\text{model}}$ . For the hyperparameters used when training the transformers, see Tables 1, 2 3.

| Number | Learning Rate | Batch Size | Weight Decay | Training Set Size |
|--------|---------------|------------|--------------|-------------------|
| 7      | 0.001         | 7          | 0.0001       | 49                |
| 17     | 0.001         | 34         | 0.0001       | 289               |
| 27     | 0.001         | 100        | 0.0001       | 729               |
| 59     | 0.001         | 200        | 0.0001       | 1770              |
| 97     | 0.001         | 200        | 0.0001       | 4850              |
| 113    | 0.001         | 500        | 0.0001       | 6780              |
| 303    | 0.0002        | 909        | 0.00002      | 45450             |
| 499    | 0.0002        | 1497       | 0.00002      | 124750            |
| 977    | 0.0001        | 4885       | 0.00001      | 488500            |
| 1977   | 0.000035      | 39540      | 0.0000075    | 2965500           |
| 4013   | 0.00004       | 16052      | 0.000006     | 3691960           |

Table 1: Experimental results with Adam optimizer across varying parameters for both pizza and clock.

| Number | Learning Rate | Batch Size | Weight Decay | Training Set Size |
|--------|---------------|------------|--------------|-------------------|
| 64     | 0.001         | 64         | 0.0001       | 49                |
| 128    | 0.001         | 128        | 0.0001       | 289               |
| 256    | 0.001         | 256        | 0.0001       | 729               |
| 310    | 0.001         | 310        | 0.0001       | 1770              |
| 720    | 0.0001        | 720        | 0.00001      | 309600            |

Table 2: Experimental results with Adam optimizer across varying parameters in pizzas.

For the hyperparameters used when training the MLP, see Table 4. The number of neurons is 8 times the moduli  $n$ .

| Number | Learning Rate | Batch Size | Weight Decay | Training Set Size |
|--------|---------------|------------|--------------|-------------------|
| 64     | 0.001         | 64         | 0.0001       | 49                |
| 128    | 0.001         | 128        | 0.0001       | 289               |
| 256    | 0.001         | 256        | 0.0001       | 729               |
| 310    | 0.001         | 310        | 0.0001       | 1770              |
| 720    | 0.0001        | 720        | 0.00001      | 309600            |

Table 3: Experimental results with Adam optimizer across varying parameters in clocks.

| Number | Learning Rate | Batch Size | Weight Decay | Training Set Size |
|--------|---------------|------------|--------------|-------------------|
| 3      | 0.01          | 3          | 0.005        | 9                 |
| 5      | 0.01          | 5          | 0.005        | 25                |
| 7      | 0.01          | 7          | 0.005        | 49                |
| 13     | 0.009         | 13         | 0.004        | 169               |
| 17     | 0.009         | 1          | 0.004        | 169               |
| 59     | 0.008         | 59         | 0.001        | 1770              |
| 64     | 0.005         | 64         | 0.0005       | 2048              |
| 113    | 0.004         | 113        | 0.0003       | 6780              |
| 128    | 0.002         | 128        | 0.0002       | 13568             |
| 193    | 0.003         | 193        | 0.0001       | 18914             |
| 256    | 0.001         | 256        | 0.0001       | 34560             |
| 310    | 0.0009        | 310        | 0.00007      | 51150             |
| 433    | 0.0006        | 433        | 0.00005      | 86600             |
| 499    | 0.0005        | 499        | 0.00003      | 124750            |
| 720    | 0.0004        | 720        | 0.000015     | 259200            |
| 757    | 0.0003        | 757        | 0.0000085    | 280090            |
| 997    | 0.0003        | 997        | 0.0000015    | 498500            |
| 1409   | 0.00028       | 1409       | 0.0000009    | 986300            |
| 1999   | 0.00024       | 1999       | 0.0000008    | 2398800           |
| 2999   | 0.00018       | 2999       | 0.0000007    | 4798400           |
| 4999   | 0.0001        | 4999       | 0.0000005    | 14997000          |

Table 4: Experimental results with Adam optimizer across varying parameters for the MLP in Figure 3.

#### E.4 Figure 4

We trained one hot encoded 1,2,3,4 hidden layer MLPs and also trained a trainable embedding matrix 1 hidden layer MLP over moduli 59-66. The classes for these models are in the “mlp\_models\_multilayer.py” file.

Table 5: Hyperparameter configurations for one-hot models with varying hidden layers and embedding.

| architecture | hidden layers | # neurons | L2 regularization  | learning rate | train size |
|--------------|---------------|-----------|--------------------|---------------|------------|
| One-hot      | 1             | 1024      | $1 \times 10^{-5}$ | 0.00075       | 90%        |
| One-hot      | 2             | 1024      | $1 \times 10^{-5}$ | 0.00075       | 90%        |
| One-hot      | 3             | 1024      | $1 \times 10^{-5}$ | 0.00075       | 90%        |
| One-hot      | 4             | 1024      | $1 \times 10^{-5}$ | 0.00075       | 90%        |
| Embedding    | 1             | 1024      | $1 \times 10^{-5}$ | 0.00075       | 90%        |

#### E.5 Figure 5

We trained 500 models of each architecture with 1-hidden layer, and each combination of number of neurons in [512, 2048, 8196, 16392] on mod 59. The models are only saved if final accuracy is  $\geq 99.9999$ . The neurons with a maximum preactivation below 0.01 across all of the data were

deleted and considered “dead” neurons. We find that as the model width is increased, a single sine wave better and better approximates the preactivations of the neurons.

The classes for the architectures are in the “mlp\_models\_multilayer.py”, “transformer\_train\_get\_data\_r2\_heatmap\_attn=0\_top-k\_layer\_all.py” and “transformer\_train\_get\_data\_r2\_heatmap\_attn=1\_top-k\_layer\_all.py”. files. See Table E.5 for precise experimental details.

Table 6: Hyperparameter configurations for Figure 5 1-embed, 1-hidden-layer models with varying hidden unit sizes and architectures.

| architecture          | hidden layers | # neurons | L2 regularization  | learning rate | train size |
|-----------------------|---------------|-----------|--------------------|---------------|------------|
| <b>MLP (baseline)</b> |               |           |                    |               |            |
| Embed=128, MLP        | 1             | 512       | $1 \times 10^{-5}$ | 0.00075       | 90%        |
| Embed=128, MLP        | 1             | 2048      | $1 \times 10^{-5}$ | 0.00075       | 90%        |
| Embed=128, MLP        | 1             | 8192      | $1 \times 10^{-5}$ | 0.00075       | 90%        |
| Embed=128, MLP        | 1             | 16384     | $1 \times 10^{-5}$ | 0.00075       | 90%        |
| <b>“Pizza”</b>        |               |           |                    |               |            |
| Embed=128, Pizza      | 1             | 512       | $1 \times 10^{-4}$ | 0.00050       | 90%        |
| Embed=128, Pizza      | 1             | 2048      | $1 \times 10^{-4}$ | 0.00050       | 90%        |
| Embed=128, Pizza      | 1             | 8192      | $1 \times 10^{-4}$ | 0.00050       | 90%        |
| Embed=128, Pizza      | 1             | 16384     | $1 \times 10^{-4}$ | 0.00050       | 90%        |
| <b>“Clock”</b>        |               |           |                    |               |            |
| Embed=128, Clock      | 1             | 512       | $1 \times 10^{-4}$ | 0.00050       | 90%        |
| Embed=128, Clock      | 1             | 2048      | $1 \times 10^{-4}$ | 0.00050       | 90%        |
| Embed=128, Clock      | 1             | 8192      | $1 \times 10^{-4}$ | 0.00050       | 90%        |
| Embed=128, Clock      | 1             | 16384     | $1 \times 10^{-4}$ | 0.00050       | 90%        |

## E.6 Figure 6

There are 10 models trained with 10 different random seeds (different random init and different random train / test splits) for every (learning rate, weight decay) combination. This is the most pessimistic case for our green checkmark vs purple dot scenario because if a single model doesn’t have 100% accuracy after ablating the neurons for our fits, then it would receive a purple dot (assuming accuracy of the trained model with no ablations was 100%). The learning rates and weight decays are:

learning\_rates = [0.0025, 0.001, 0.00075, 0.0005, 0.00025, 0.0001, 0.000075, 0.00005, 0.000025, 0.00001]

weight\_decays = [ 0.001, 0.00075, 0.0005, 0.00025, 0.0001, 0.000075, 0.00005, 0.000025, 0.00001, 0.0000075, 0.000005, 0.0000025, 0.000001, 0.00000075, 0.0000005, 0.00000025, 0.0000001 ]

There are 1024 neurons in every layer of the models. The embedding matrix has 128 features.

## E.7 Figure 7

There are 10 models trained with 10 different random seeds (different random init and different random train / test splits) for every (learning rate, weight decay) combination. This is the most pessimistic case for our green checkmark vs purple dot scenario because if a single model doesn’t have 100% accuracy after ablating the neurons for our fits, then it would receive a purple dot (assuming accuracy of the trained model with no ablations was 100%). The learning rates and weight decays are:

learning\_rates = [0.0025, 0.001, 0.00075, 0.0005, 0.00025, 0.0001, 0.000075, 0.00005, 0.000025, 0.00001]

weight\_decays = [ 0.001, 0.00075, 0.0005, 0.00025, 0.0001, 0.000075, 0.00005, 0.000025, 0.00001, 0.0000075, 0.000005, 0.0000025, 0.000001, 0.00000075, 0.0000005, 0.00000025, 0.0000001 ]

The embedding matrix has 128 features. There are 1024 neurons in every layer.

## 912 E.8 Figure 8

913 There are 10 models trained with 10 different random seeds (different random init and different  
914 random train / test splits) for every (learning rate, weight decay) combination. This is the most pes-  
915 simistic case for our green checkmark vs purple dot scenario because if a single model doesn't have  
916 100% accuracy after ablating the neurons for our fits, then it would receive a purple dot (assuming  
917 accuracy of the trained model with no ablations was 100%). The learning rates and weight decays  
918 are:  
919 learning\_rates = [0.0025, 0.001, 0.00075, 0.0005, 0.00025, 0.0001, 0.000075, 0.00005, 0.000025,  
920 0.00001]  
921 weight\_decays = [ 0.001, 0.00075, 0.0005, 0.00025, 0.0001, 0.000075, 0.00005, 0.000025, 0.00001,  
922 0.0000075, 0.000005, 0.0000025, 0.000001, 0.00000075, 0.0000005, 0.00000025, 0.0000001,  
923 0.000000075, 0.00000005, 0.00000001 ]  
924 2048 neurons in each layer, 2 layers.

## 925 E.9 Figure 9

926 5000 models were trained to make these figures. 1 and 4 hidden layers on mod 66.  
927 The learning rate = 0.00075.  
928 The weight decay penalty was L2 regularization = 0.0001.  
929

## 930 F Further experimental results

### 931 F.1 Goodness of fit of the single sinusoidal approximation

932 These plots ended up below as Figure 36 and Figure 37. This section will be removed in future  
933 versions.

## 934 G Additional experiments we didn't put in the main text

935 The point of this section is to hopefully provide interested readers with empirical results that weren't  
936 necessary for the main text. These experiments are omitted due to either space constraints or low  
937 priority.

938 Note: we call the neurons learning non-integer frequencies over 2, e.g.  $f = \frac{1}{2}$  after remapping  
939 "fine-tuning" neurons.

### 940 G.1 Principal component analyses (PCA) of embeddings

941 Below, we answer all the open problems of Zhong et al. [5] involving non-circular embeddings. The  
942 idea of doing the Discrete Fourier Transform (DFT) on the embedding PCA's, gives that they are  
943 caused by two different frequency sines: one coming from each principle component (PC).

944 We replicate the results of [5] and add an additional Fourier transform plot next to their PCA plots,  
945 which makes it obvious that the principal components come from clusters with the same frequency.  
946 It can be seen that all non-circular embeddings and Lissajous embeddings are caused by the two  
947 principal components coming from different cosets. This means that we answer all of the open  
948 problems of [5], involving non-circular embeddings.

949 To make this easy to understand, please see Fig. 14, showing this random seed has four clusters, with  
950 key frequencies 35, 25, 8, 42. We now know what frequencies to look for in the DFT plots and thus,  
951 can figure out which PCs come from which frequency clusters. Doing so reveals that all PCs where  
952 both PCs come from the same frequency cluster are circular. Conversely, all PCs where the PCs come  
953 from different clusters are non-circular Lissajous curves.

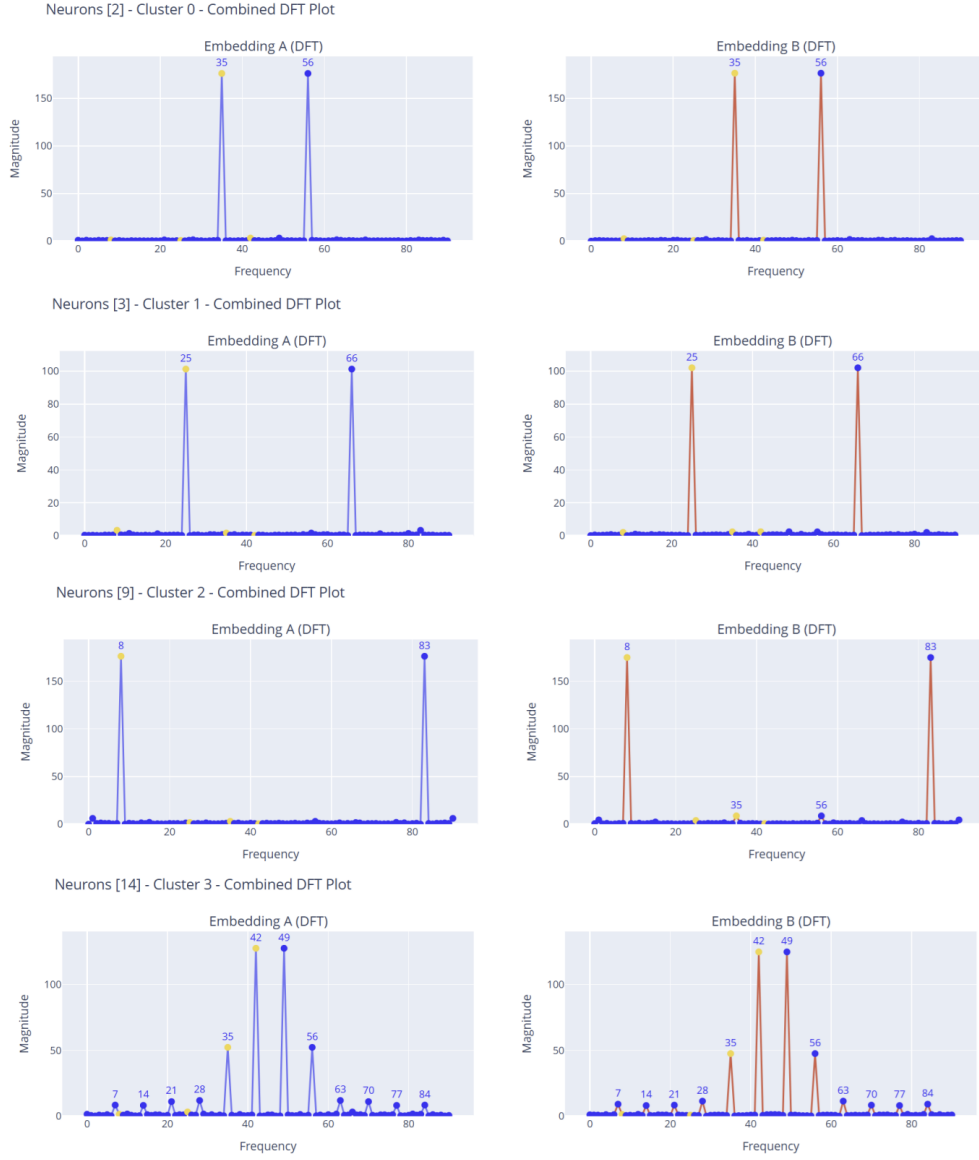

Figure 14: DFT of neurons in each of the four clusters in this random seed. Cluster 0 has frequency 35, cluster 1 has frequency 25, cluster 2 has frequency 8, and cluster 3 is a fine-tuning cluster with frequencies at multiples of 7, 14, 21, 28, 35, and 42.



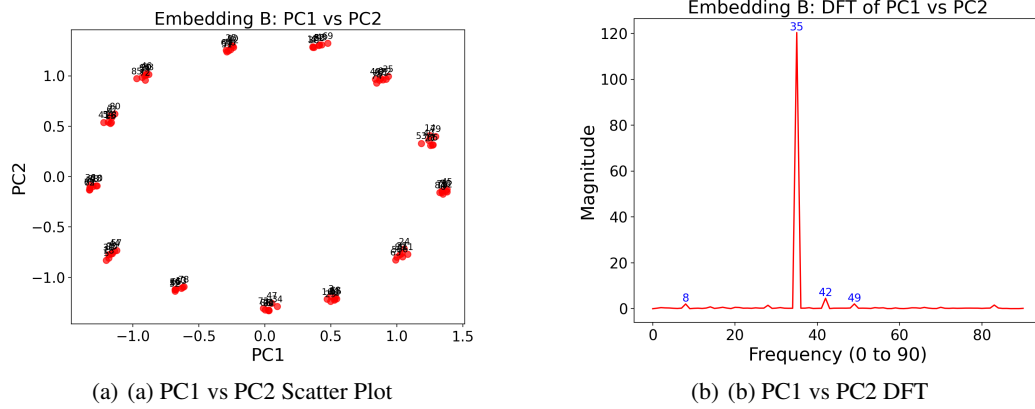

Figure 15: PCA and DFT for PC1 vs PC2 showing a circular embedding clustered into cosets. The x and y axis of the left plot are the PC1 and PC2 values for the concatenated embedding matrix for each point  $(a, b) \bmod 91 \in (0, 0), (1, 1), \dots, (90, 90)$ . Note that this covers all output classes of the neural network exactly once. Also note that the embedding here is showing 13 cosets with 7 points in them each, *i.e.* all 13 cosets  $(a + b) \bmod 13 = i, i \in \{0, \dots, 12\}$  are in the plot. Both PC1 and PC2 have  $f = 35$  and since  $\gcd(35, 91) = 7$ , a prime factor, it's possible to learn the exact cosets.

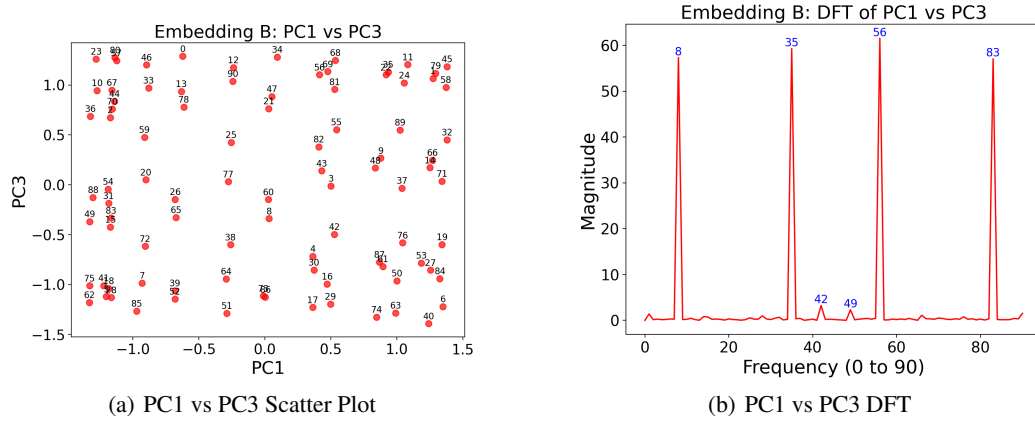

Figure 16: PCA and DFT for PC1 ( $f = 35$ ) vs PC3 ( $f = 8$ ), a non-circular embedding.

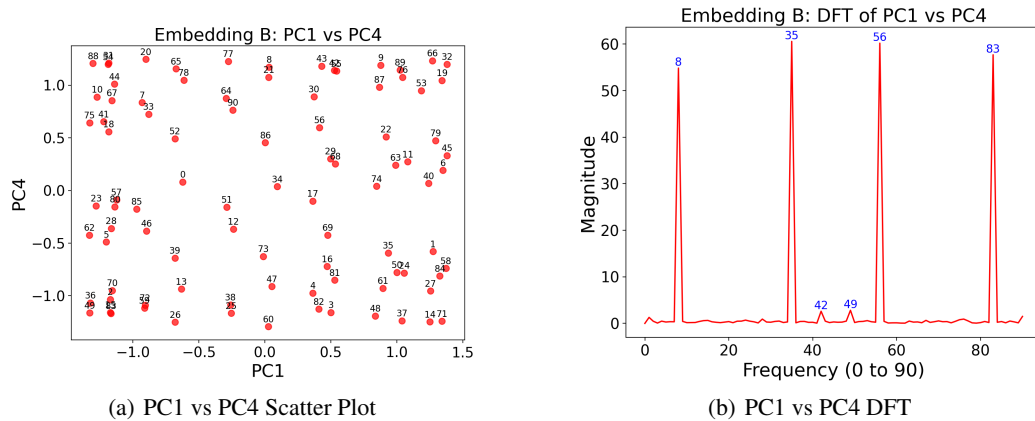

Figure 17: PCA and DFT for PC1 ( $f = 35$ ) vs PC4 ( $f = 8$ ), a non-circular embedding.

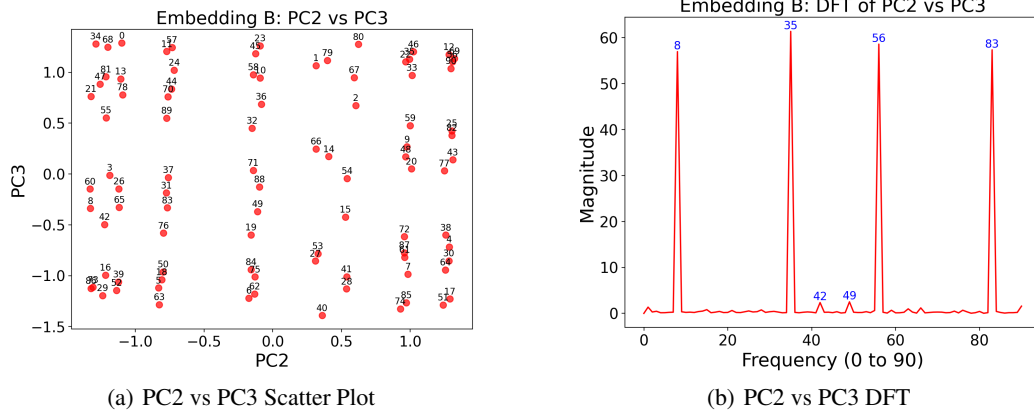

Figure 18: PCA and DFT for PC2 ( $f = 35$ ) vs PC3 ( $f = 8$ ), a non-circular embedding.

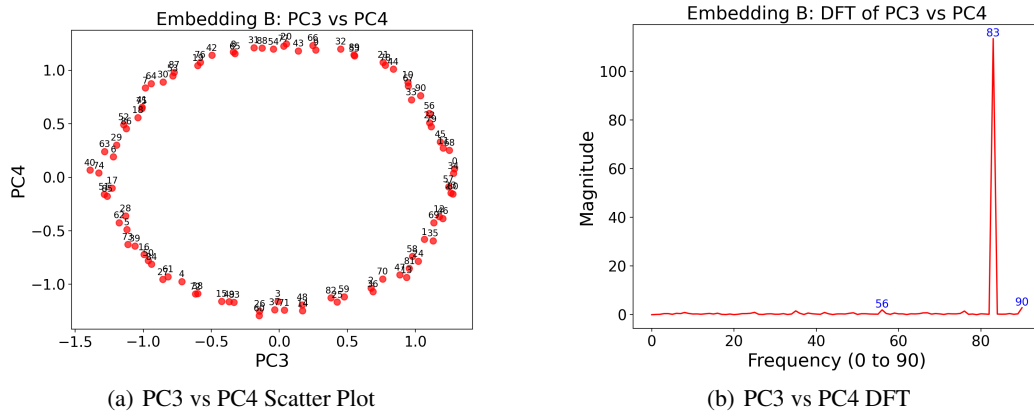

Figure 19: PCA and DFT for PC3 ( $f = 8$ ) vs PC4 ( $f = 8$ ), which is a circular embedding because both PC's come from the same frequency cluster.

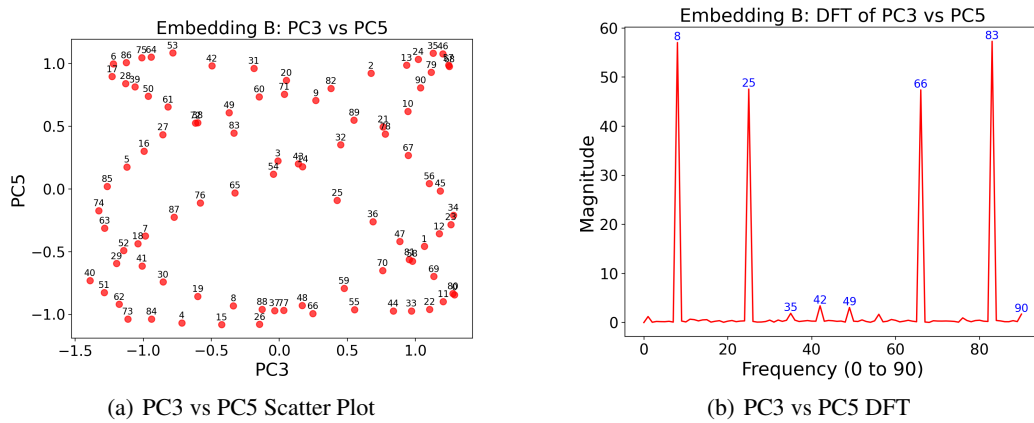

Figure 20: PCA and DFT for PC3 ( $f = 8$ ) vs PC5 ( $f = 25$ ), a non-circular embedding.

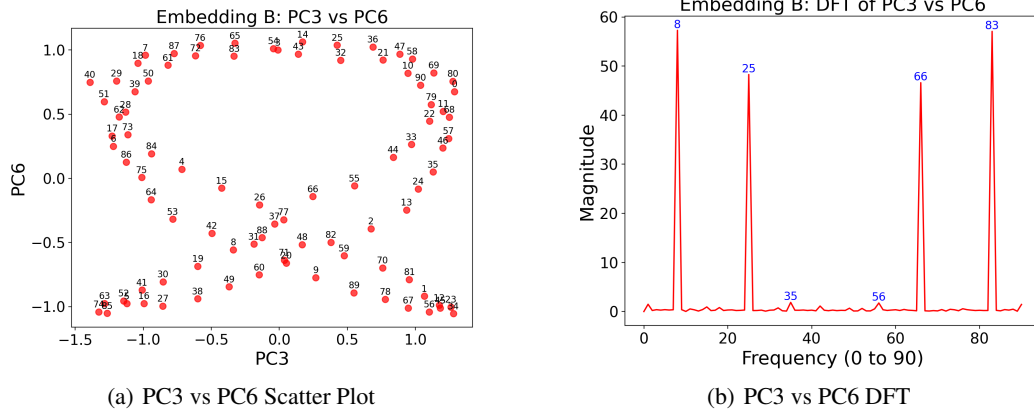

Figure 21: PCA and DFT for PC3 ( $f = 8$ ) vs PC6 ( $f = 25$ ), a non-circular embedding.

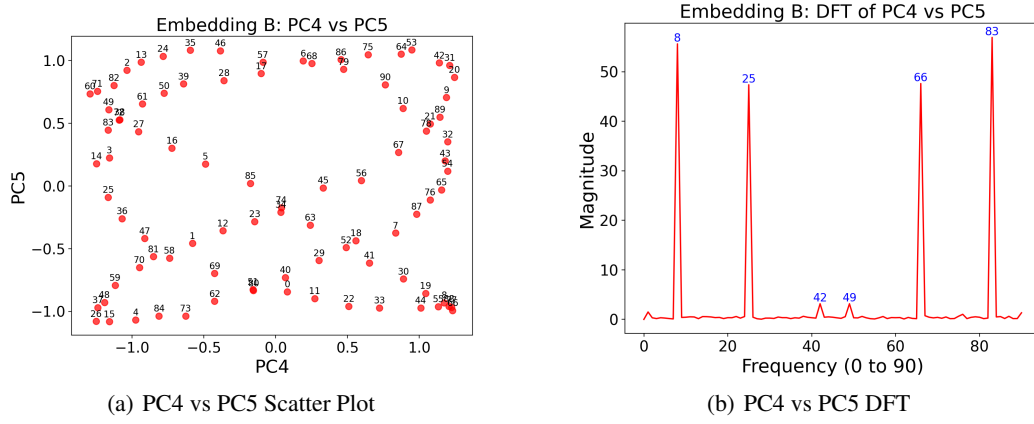

Figure 22: PCA and DFT for PC4 ( $f = 8$ ) vs PC5 ( $f = 25$ ), a non-circular embedding.

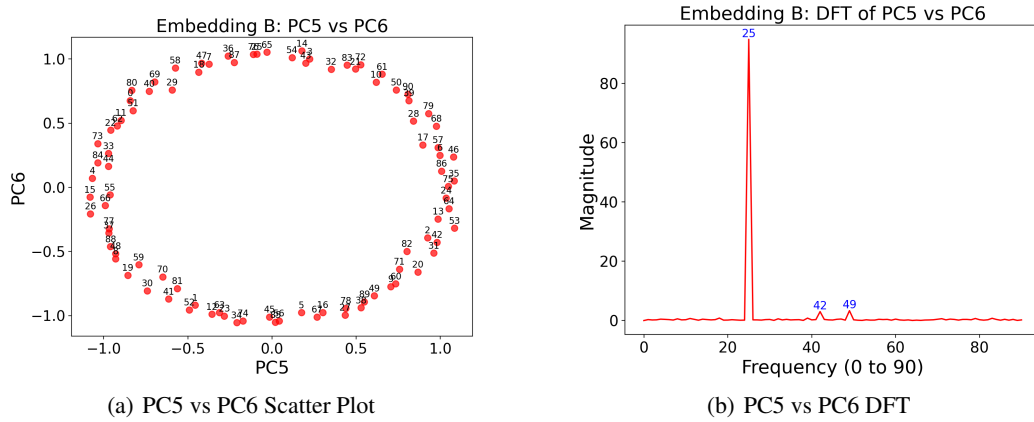

Figure 23: PCA and DFT for PC4 ( $f = 25$ ) vs PC5 ( $f = 25$ ), a circular embedding as both PCs come from the same frequency cluster.

## 954 G.2 More examples of simple neurons

955 See Fig. 24 for a cluster of simple neurons. The neuron remapping (via group isomorphism) can be  
 956 seen in Fig. 25.

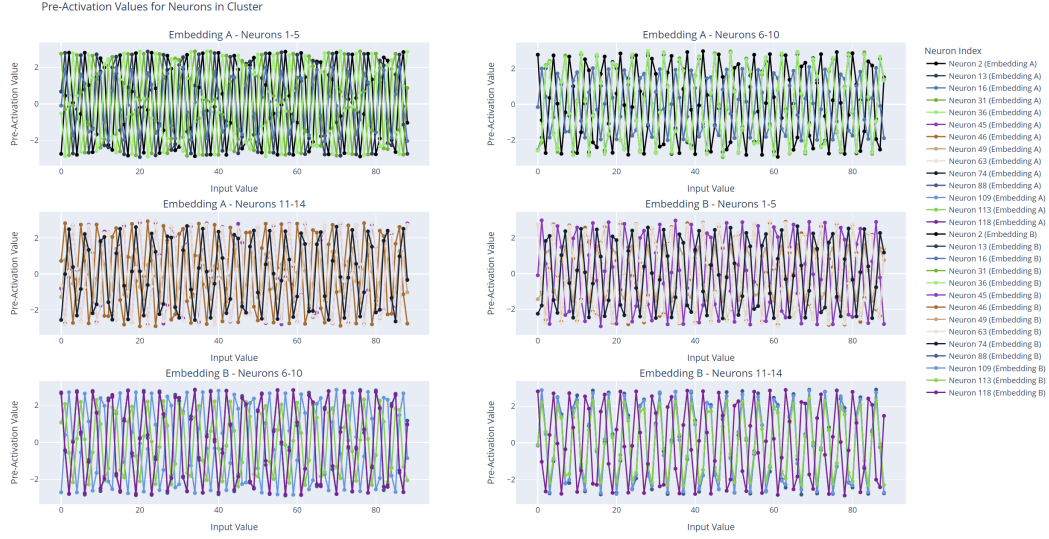

Figure 24: an example cluster of 14 simple neurons of frequency 21.

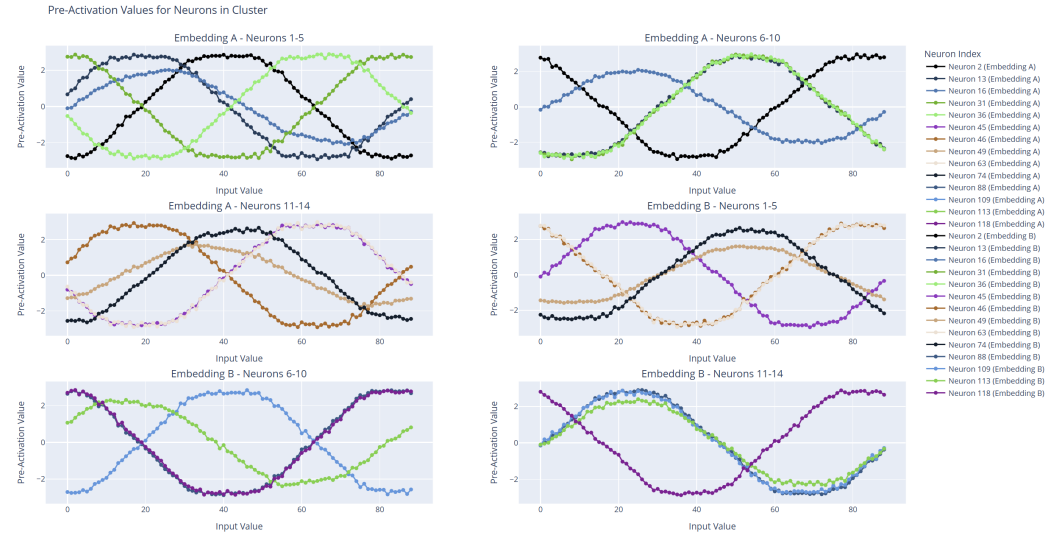

Figure 25: A cluster of simple neurons (from Fig. 24) transformed by group isomorphism so that all neurons have period 1.

## 957 G.3 Studying phase shifts in simple neurons

958 Here we show how the phases of different neurons in a cluster overlap to give some more information  
 959 about how clusters of neurons function. See Fig 26(a) for the histograms of the phases of the  
 960 preactivations of the neurons in a cluster.

Cluster 1: 14 neurons, frequency = 21

Histogram of Phases for Cluster 1; 14 neurons, frequency = 21

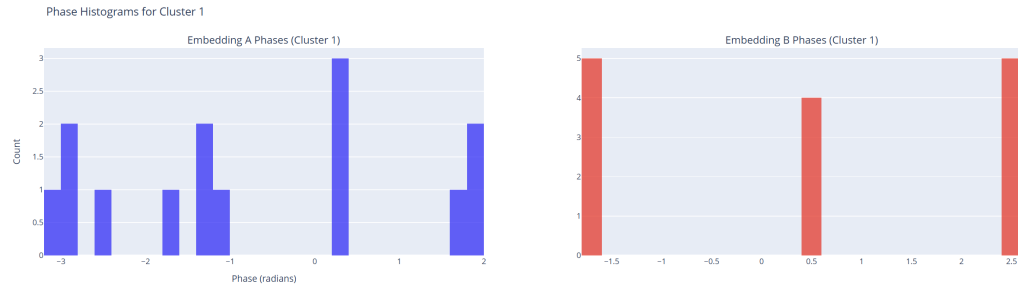

(a) Histogram of preactivations for two neurons in a fine-tuning cluster. The x-axis is the input value into the network for  $a$  (left) and  $b$  (right).

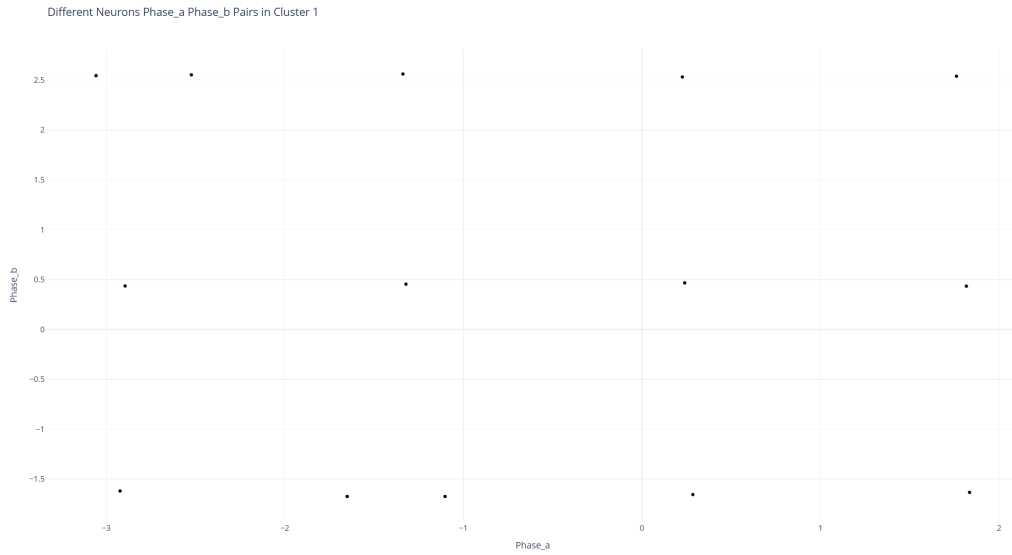

(b) 2D scatter plot created by grouping the phases for each neurons  $a$  and  $b$  preactivations into a pair (phase-a, phase-b) and plotting the points for all neurons in the cluster in the 2D plane as a black point. In this case, the cluster has 14 neurons of frequency 21.

Figure 26: Histogram of phases (top) and 2D scatter plot of phases (bottom) for a simple neuron cluster with frequency 21.

961 For a higher resolution view of what's going on, see a 2d scatter plot created by grouping the phases  
 962 for each neuron's  $a$  and  $b$  preactivations into a pair (phase-a, phase-b) and plotting the points for all  
 963 neurons in the cluster in the 2d plane as a black point, see Fig 26(b). It's worth noting that the phases  
 964 are nice and spread out uniformly like in Fig 26(b) only about half the time. In the other cases

965 We aren't sure what causes the phases to sometimes align in a nice grid, vs a much more "random"  
 966 looking configuration as seen in Figure 27. Understanding this is likely essential for proving a  
 967 realistic bound for the number of neurons needed with the same frequency. We leave this for future  
 968 work.

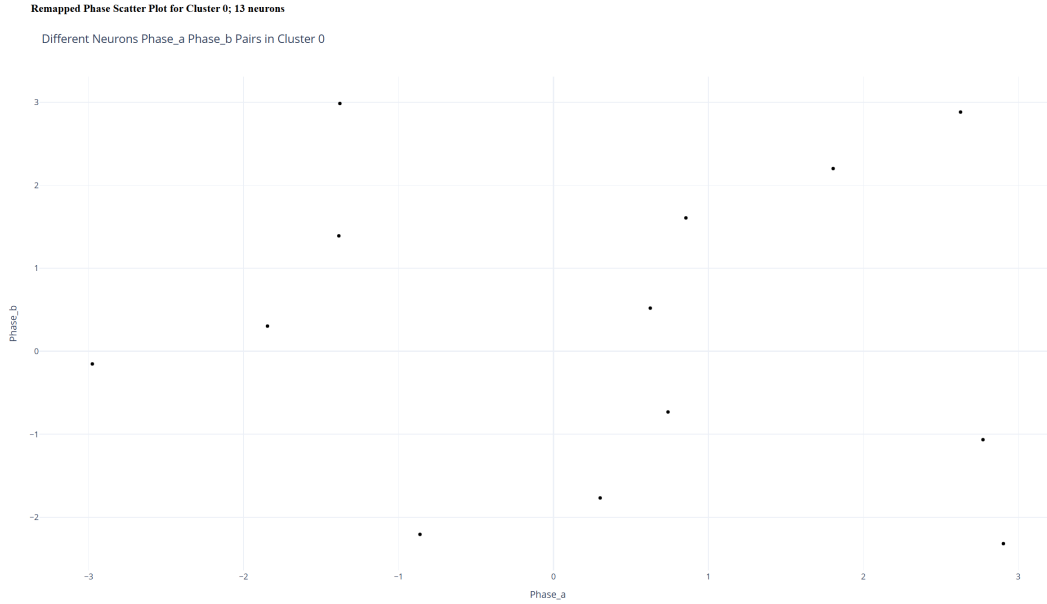

Figure 27: Here's an example where the phases aren't in a nice grid like they were in Figure 26.

#### 969 **G.4 Studying fine-tuning neurons**

970 Fine-tuning neurons are composed of linear combinations of group representations, in contrast  
 971 with simple neurons which are composed by one group representation. Additionally, fine-tuning  
 972 neurons are composed of group representations for what are called harmonic frequencies of the main  
 973 frequency, for  $f = 7$  these would be the multiples of 7, *e.g.*  $\{14, 21, 28, 35, 42, \dots\}$ .

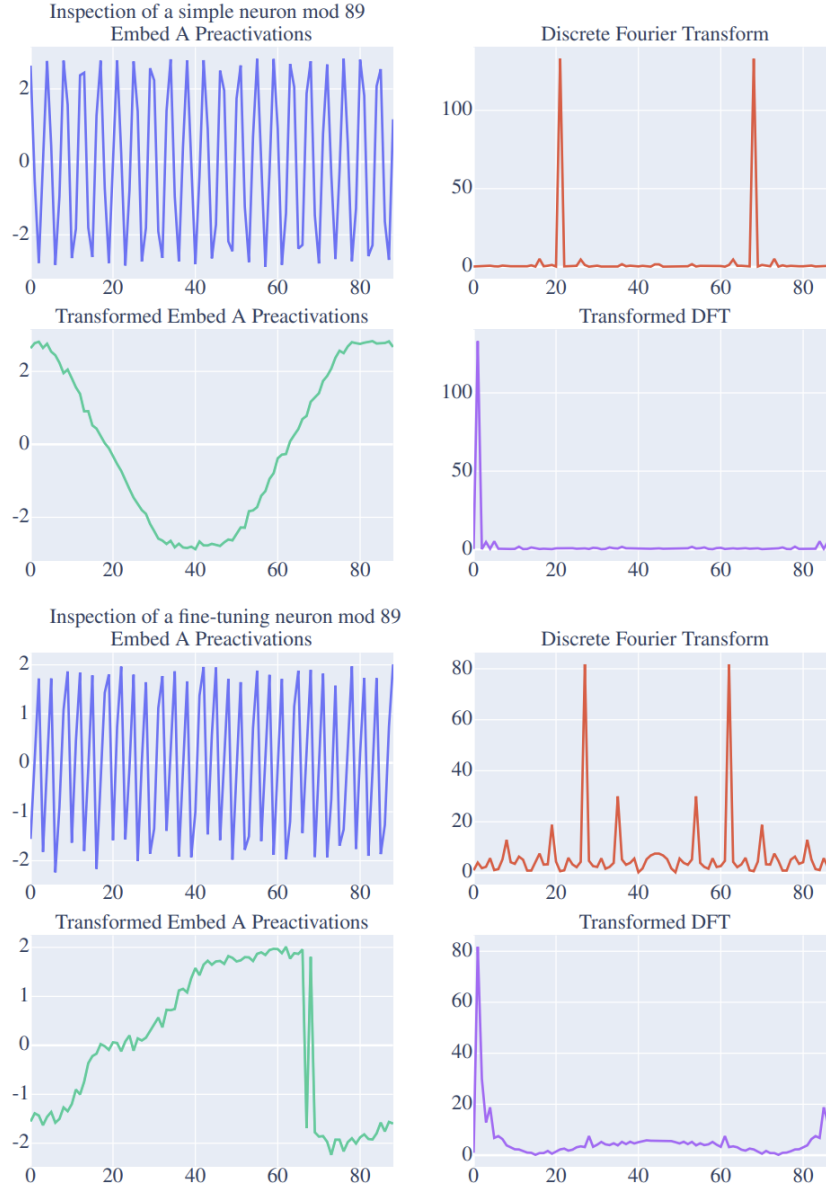

Figure 28: Comparing a simple neuron and fine-tuning neuron before and after transformation by a group isomorphism. The fine-tuning neuron has its DFT concentrating strongest on (27, 35, 19).

974 We train a neural network with random seed 133 and discover a cluster of fine-tuning neurons. The  
 975 preactivations for two of these neurons are shown in Fig. 29 and the DFT's for these two neurons are  
 976 shown in Fig. 30.

977 We show that these neurons can be generated by linear combinations of representations in Fig. 31.

### Cluster 3

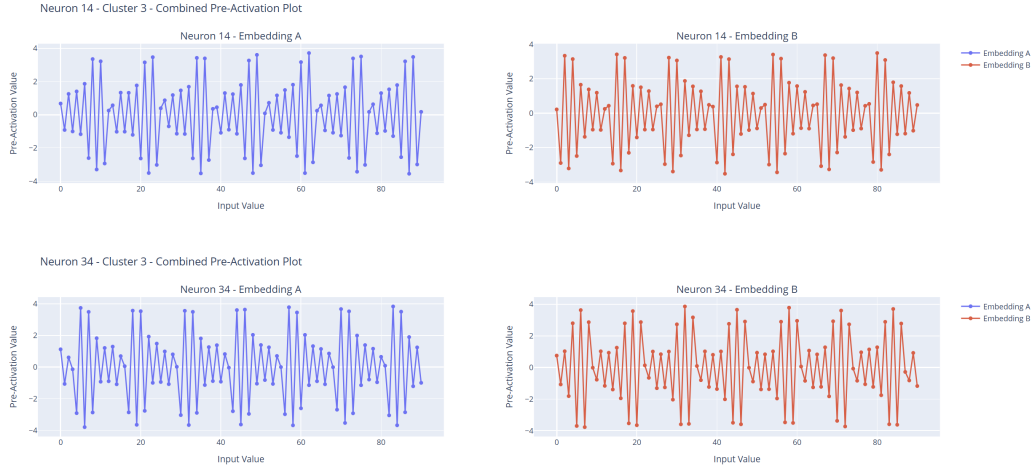

Figure 29: This shows a cluster of fine-tuning neurons and shows the preactivations of the first two neurons in the cluster. The x-axis is the input value into the network for  $a$  on the left, and the input value for  $b$  on the right.

### Cluster 3

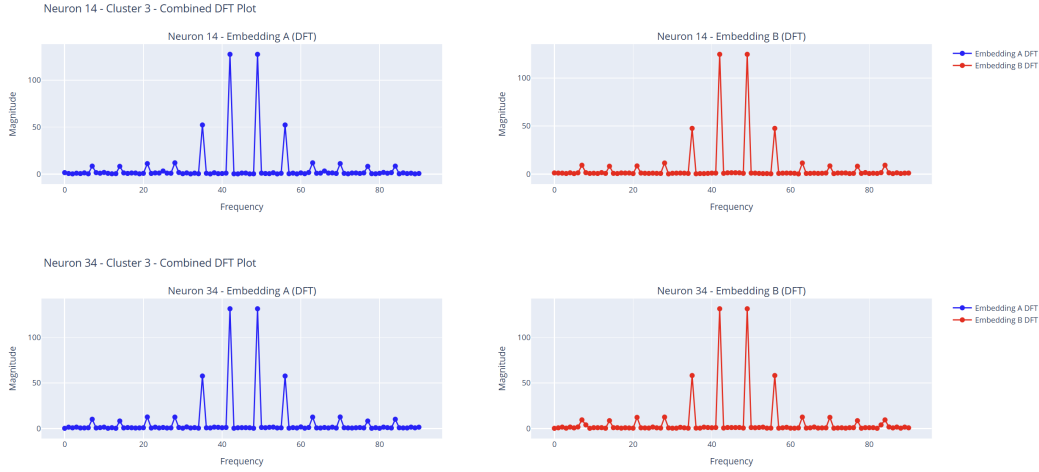

Figure 30: This shows the DFT's of the preactivations of the fine-tuning neurons seen in Fig. 29. The x-axis is the frequency (from 0-90 because this is  $(a + b) \bmod 91$ ). The y-axis shows that the representations contributing are 42, 35, 28, 21, 14, 7 in descending order. Note the DFT is symmetric about its midpoint so values after 45 contain the same information as the values up to 45.



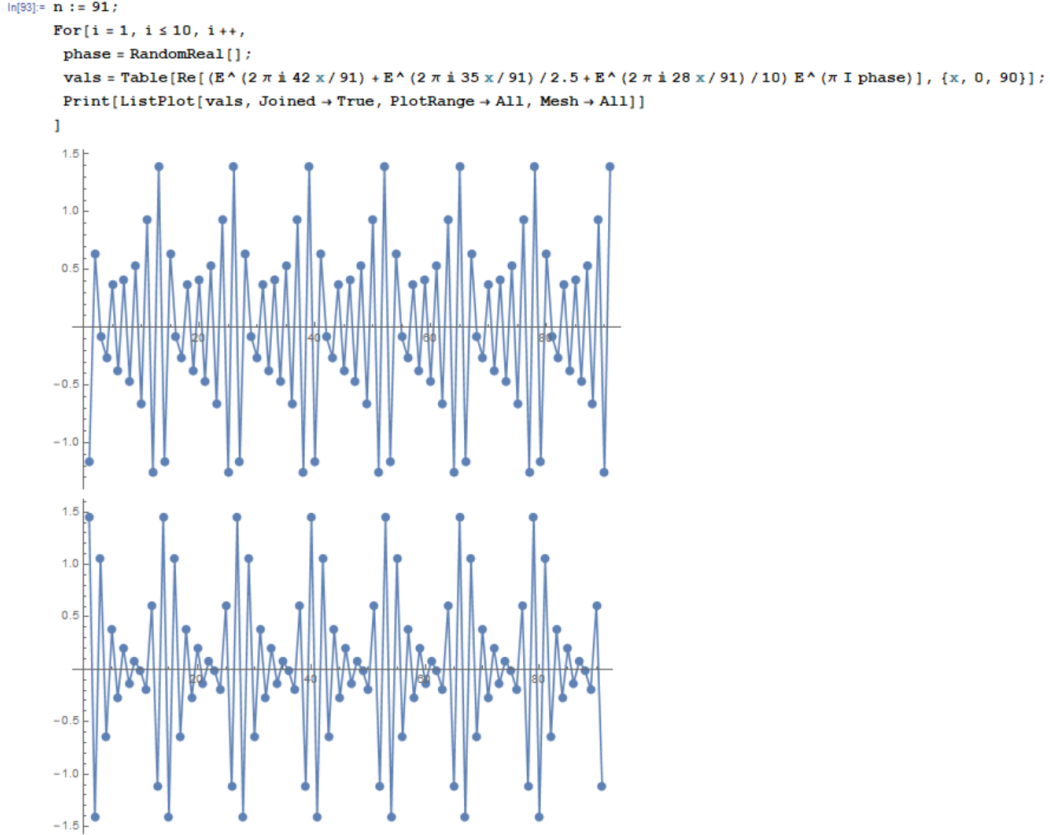

Figure 31: Constructing a fine-tuning neuron. This diagram illustrates the step-by-step process of constructing a fine-tuning neuron, highlighting that it is a linear combination of representations.

## 978 G.5 Histograms of frequency learned counts for simple and fine-tuning neurons

979 Note that the next two histograms are created by recording frequencies with weights in the DFT in the  
 980 range of (7.5, 30). This is not a sufficient way to always detect fine tuning neurons, and sometimes it  
 981 will include simple neurons in its counts, however this is much more rare. If you consider the ability  
 982 for neurons with preactivations of specific frequencies to contaminate other neurons frequencies  
 983 slightly (because they may modify values in the embedding matrix by a small amount), you will  
 984 see where this counting method can go awry. It is however the case that usually, the contamination  
 985 coming from a different cluster of simple neurons is below 7.5. Thus, these plots should not be  
 986 considered “accurate” and just approximations.

987 These plots are still useful to show the relative frequency of simple neurons vs. fine tuning neurons.  
 988 The histogram of Frequencies found Fig. 32(a) found a uniform distribution with each frequency  
 989 showing up about 10k times. Removing the vast majority of contamination by filtering with 7.5  
 990 (usually the DFT magnitudes on other frequencies are 0 and if they aren’t near 0 then they are  
 991 less than 4 and there is a simple neuron making use of that frequency in a different cluster (*i.e.* a  
 992 simple neuron has one big spike with magnitude over 60 on that frequency). This gives us about  
 993 2200 fine-tuning neurons found with each frequency, including overcounting because fine-tuning  
 994 neurons make use of linear combinations of representations and thus their DFT usually has three or  
 995 more values in the range (7.5, 30). Thus the histograms of frequencies associated with fine-tuning  
 996 neurons are upper bounds on the number of clusters that are identified across 100k random seeds to  
 997 be fine-tuning neurons. Around 25 percent of runs have fine-tuning neurons in them, but we aren’t  
 998 sure how hyperparameter settings affect this.

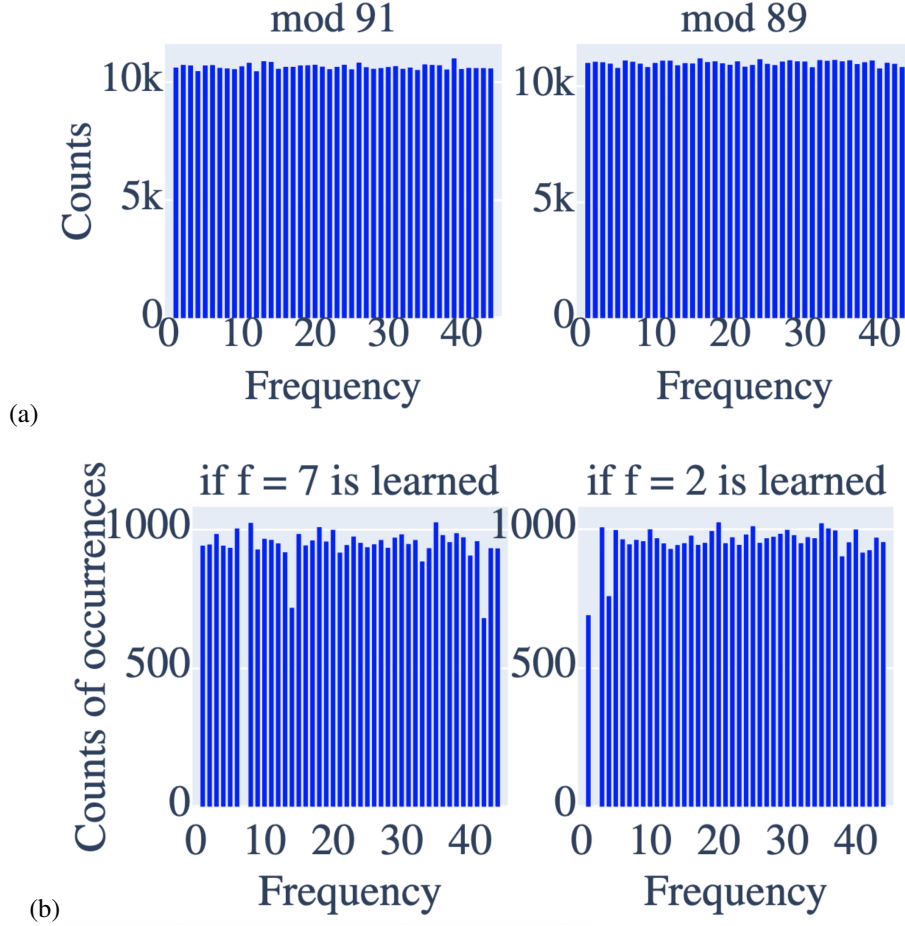

Figure 32: (a) Histograms of frequencies found across 100k random seeds in MLPs mod 91 (factors 7 and 13) and mod 89 (prime) are both uniform. The fact both prime and composite numbers give uniform distributions is strong evidence that networks are learning the same thing in both problem settings. In fact, this observation – that networks do not prefer prime factor frequencies (exact cosets) – is what led us to define approximate cosets and identify the abstract approximate CRT algorithm, which is learned with both prime and composite moduli. (b) Conditional histograms of frequencies over 100k seeds, both mod 91. Left: if frequency 7 is found then neurons with  $f = 14$  or  $f = 43$  are less likely (note that  $2 \cdot 43 \equiv -7 \pmod{91}$ ). Right: if frequency 2 is present then frequencies 1 and 4 are less likely. The conditional histograms show that networks try to avoid learning frequencies with additive and subtractive relations. This is for a similar reason to why the CRT does not work unless all factors of  $n$  are coprime – they would intersect and boost the value of incorrect logits, substantially increasing the loss.

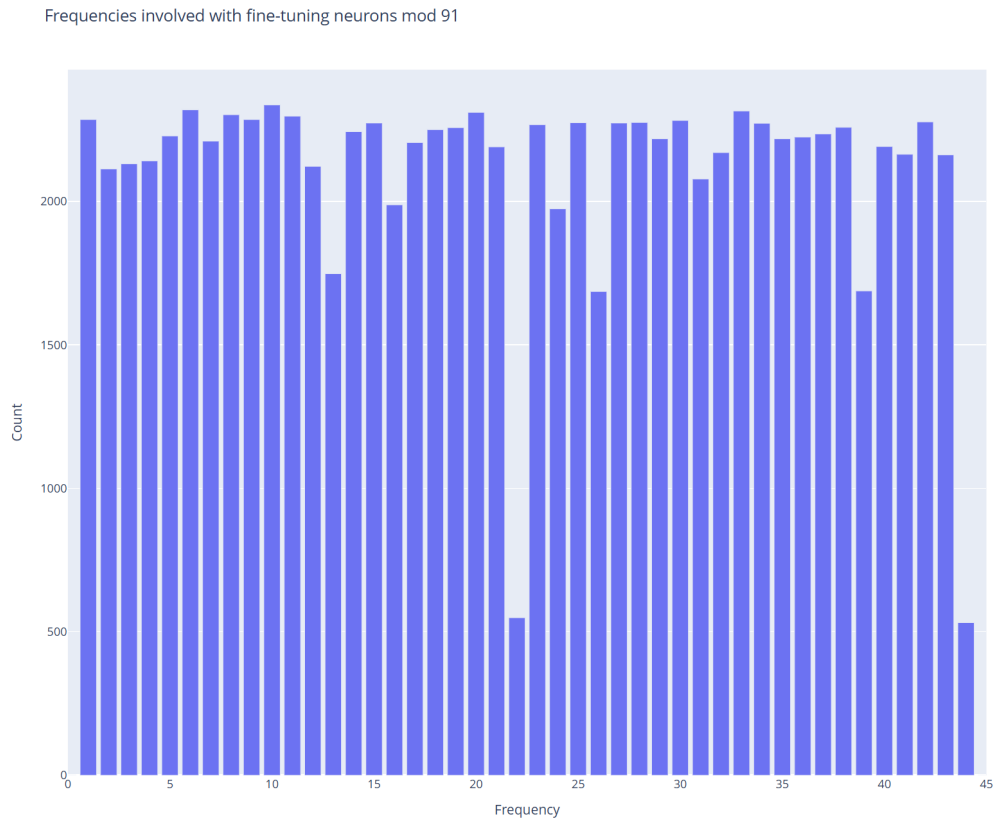

Figure 33: Histogram of frequencies (0–45) associated with fine-tuning neurons over 100k random seeds for modulus 91. Note that frequencies 22 and 44 are least common, and 13, 26, 39 also appear less frequently, giving a case where the neural net is less likely to find some prime factors. It makes sense that neural networks won't always discover the prime factors or they'd be solving prime factorization.

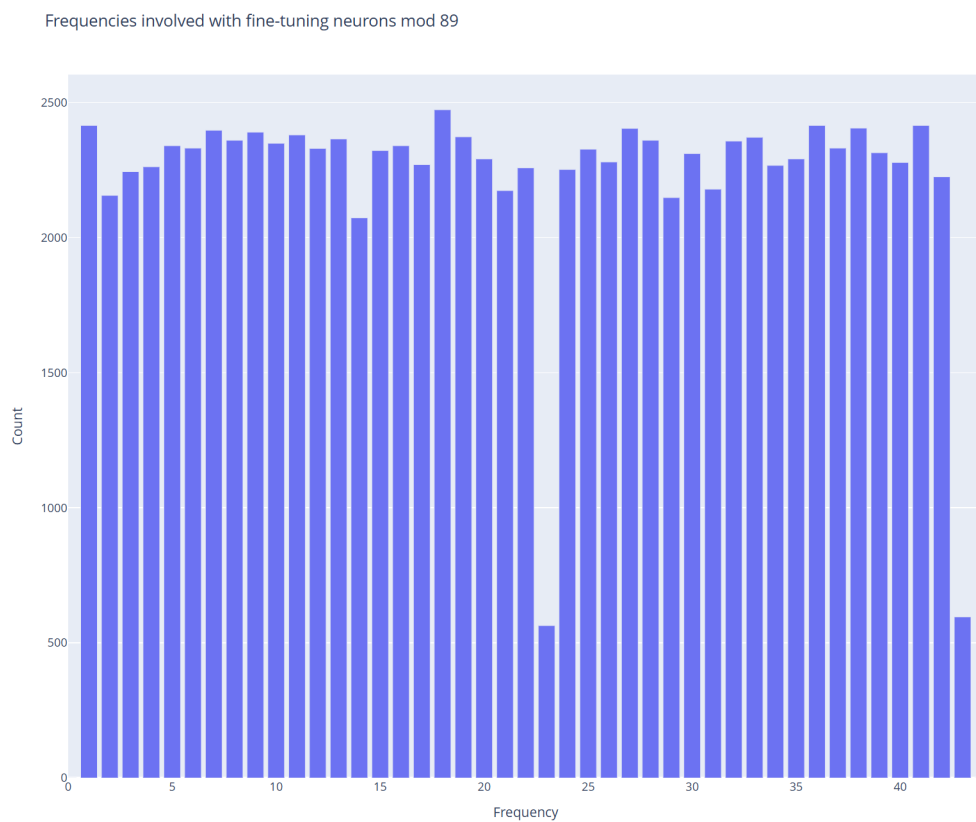

Figure 34: Histogram of frequencies (0–44) associated with fine-tuning neurons over 100k random seeds for modulus 89. Note that frequencies 23 and 43 are the least common.

999 **G.6 Fine-tuning neurons like additive and subtractive relations**

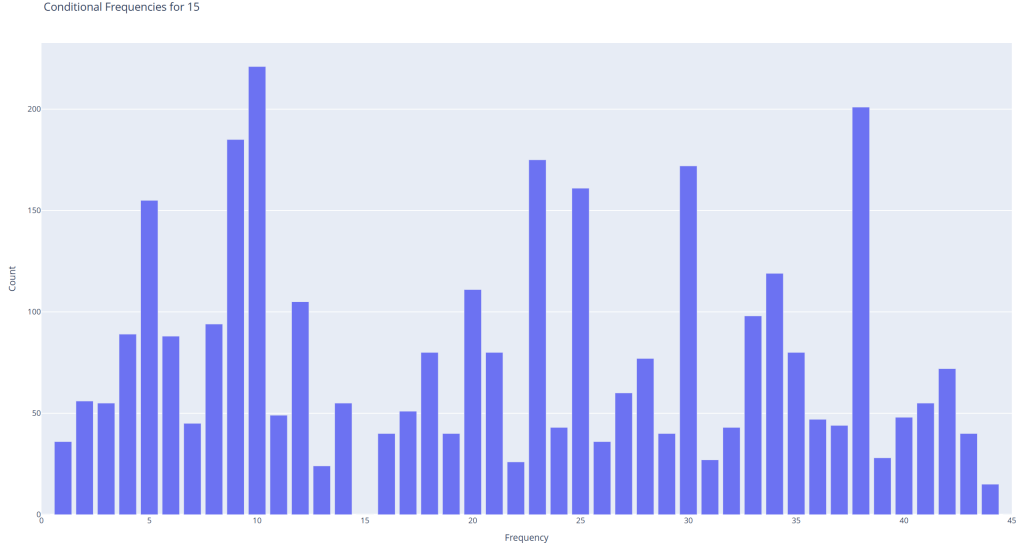

(a) Fine-tuning Neuron Additive Relations given 15 is a frequency;  $(a + b) \bmod 91$ .

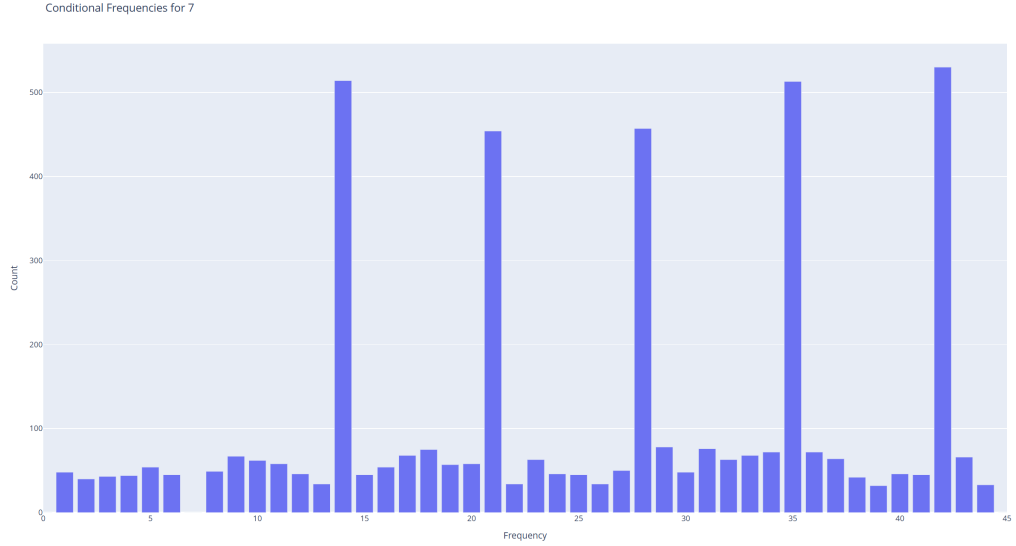

(b) Fine-tuning Neuron Additive Relations given 7 is a frequency;  $(a + b) \bmod 91$ .

Figure 35: Fine-tuning neuron additive relations for two different cases. If a neuron with frequency 15 is learned, frequencies that are multiples of 5 are more likely to be found. The same applies to 7, which is a prime factor of 91, the moduli.

1000 **G.7 Histograms of counts of frequencies being learned in mod 59 and mod 66 across varying**  
 1001 **depths in the pizza and clock transformers as well as MLPs (with 1 embedding layer)**

1002 Here we show histograms counting the frequencies learned and the lengths of the average number of  
 1003 neurons involved in a frequency cluster given frequency  $f$  was learned over 500 seeds for each  
 1004 architecture.

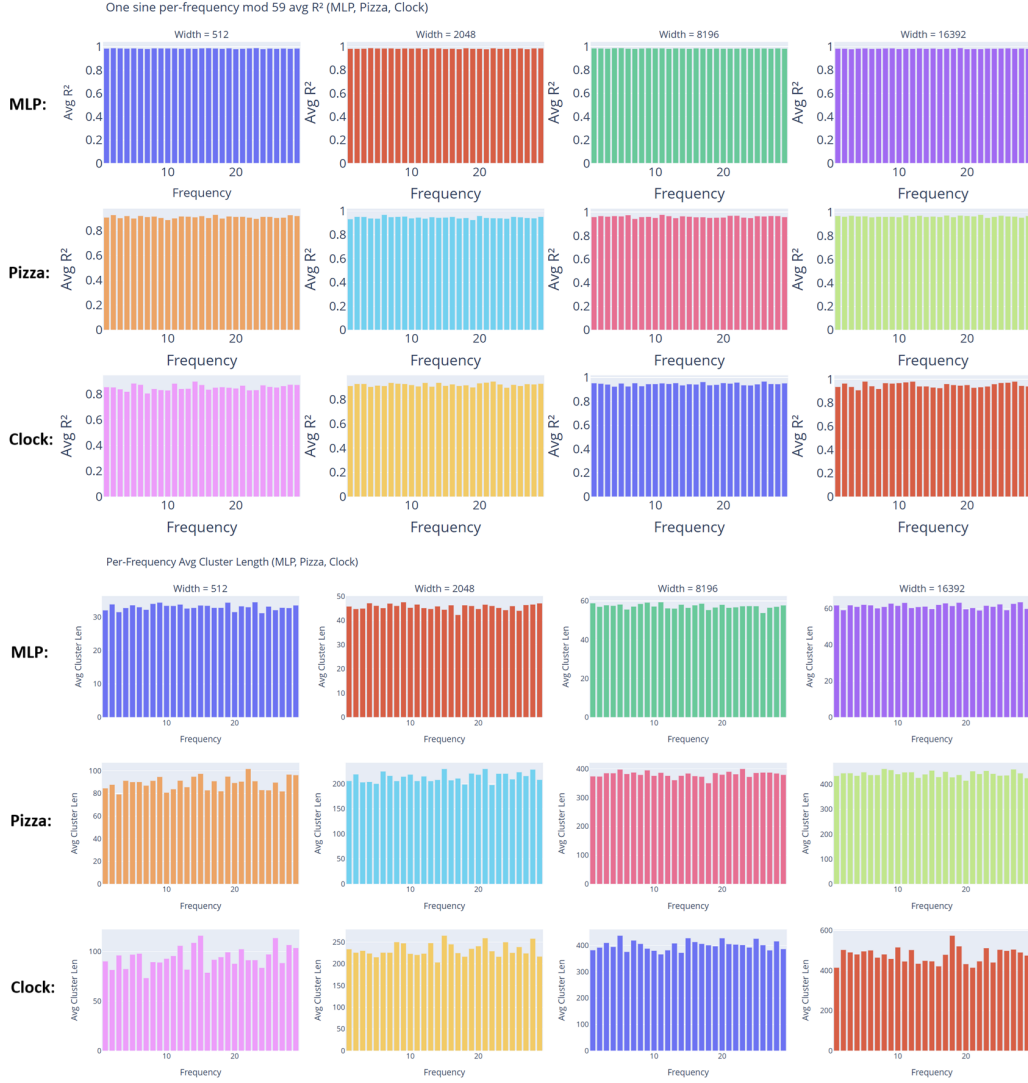

Figure 36:  $(a + b \bmod 59)$ : The first three rows show the histograms of learned frequencies and the bottom three rows show histograms of the average length of a cluster, i.e. number of neurons in the cluster.

We check the goodness of fit as a function of frequency, and find that on mod 66 with prime factors 2, 3 and 11, the  $R^2$  value is much closer to 1.0 for MLPs when frequencies 22 or 33 are learned ( $2 \times 11$ ) and ( $3 \times 11$ ). Indeed, if the network learns 22 or 33, we see that the length (the number of neurons with that frequency) is substantially lower than if it learns other frequencies. The  $R^2$  is also higher for MLPs if it learns ( $2 \times 6$ ), however it's not as high in the previous cases, and doesn't have the change in the number of neurons that the other two cases have. Overall, this makes sense as in this situation, it can learn the exact cosets instead of needing to learn approximate cosets. Investigation into which frequencies require less neurons is an interesting subject for future study; why is it not all cosets?

Some cosets are more likely to be learned than others.

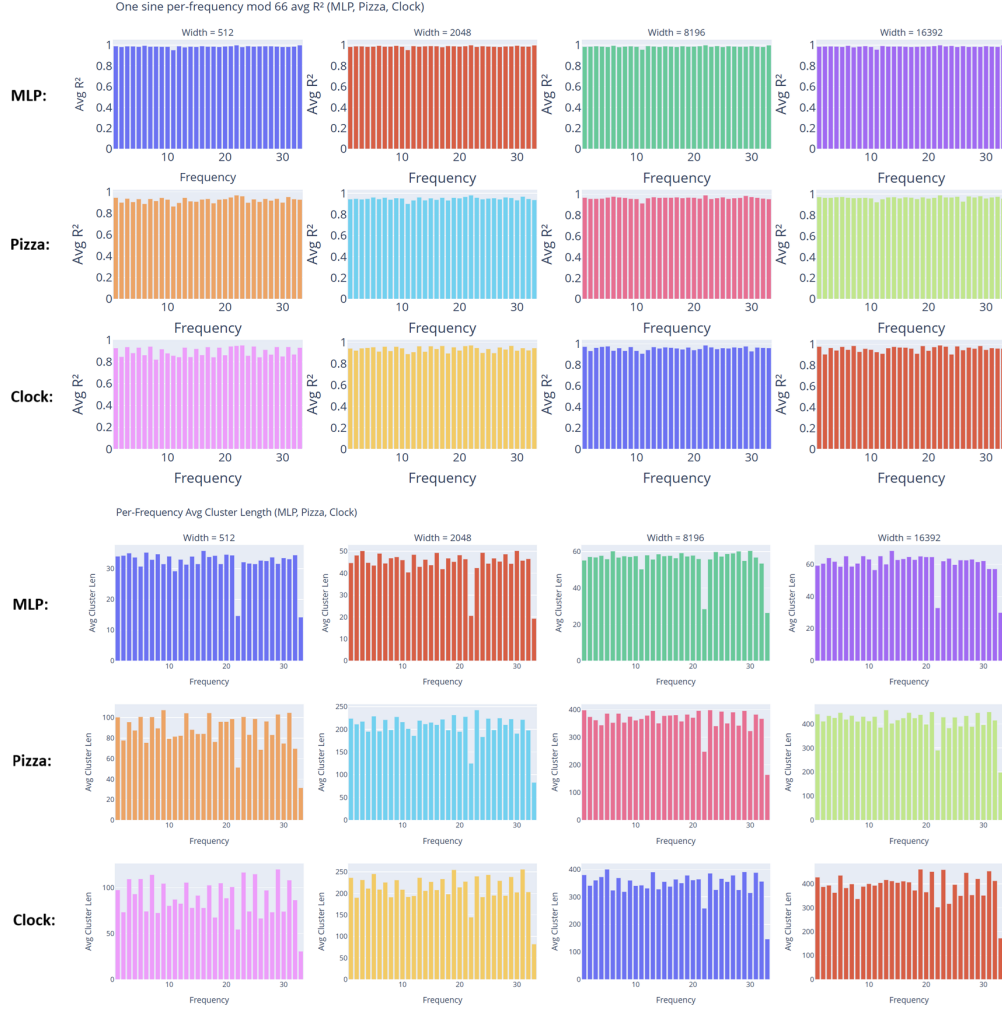

Figure 37:  $(a + b \bmod 66)$ : The first three rows show the histograms of learned frequencies and the bottom three rows show histograms of the average length of a cluster, i.e. number of neurons in the cluster; note that learning precise cosets results in less neurons being required.

## 1014 G.8 Noise and ablation studies

1015 In this section, we take the clusters from random seed 133 and we randomly inject multiplicative  
 1016 scaling noise into every weight attached to neurons in the cluster. We do this by multiplying the  
 1017 weight by  $e^s$ ,  $s \sim \mathcal{N}(0, \sigma)$ , for various  $\sigma$  on the x-axis in Fig. 38(b)

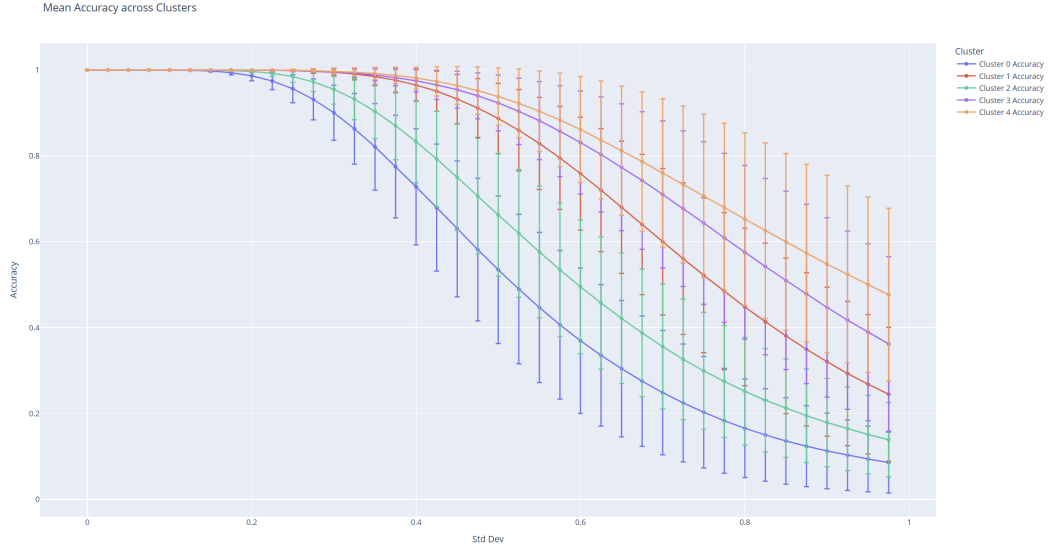

(a) Multiplicative Noise injected into every weight of every neuron in a cluster from a normal distribution with std dev  $\sigma$ .

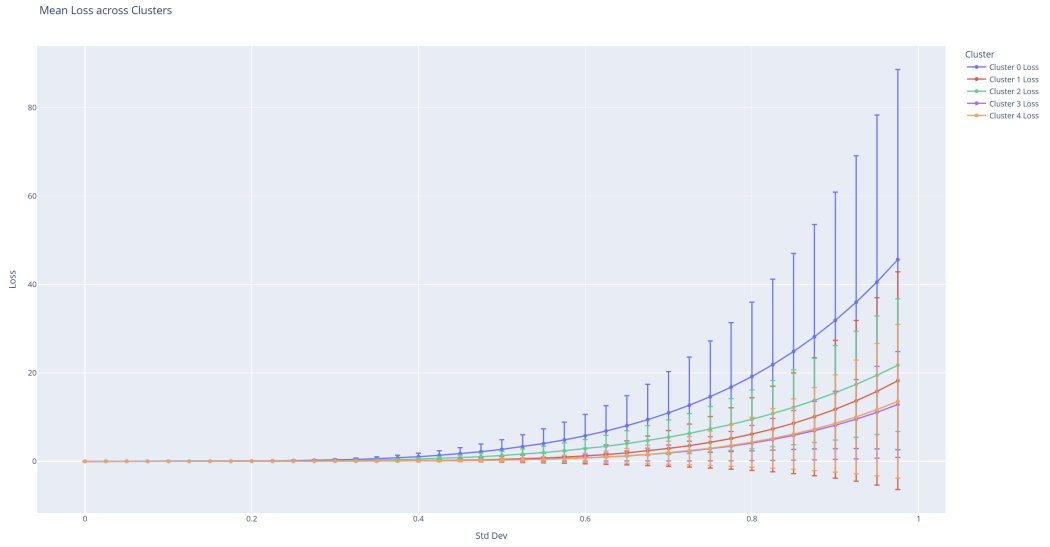

(b) Effect of Multiplicative Noise on the loss function.

Figure 38: Neural network robustness to injected multiplicative noise. The loss remains stable even with a std dev of 0.225. Note cluster 3 and 4 are composed of four fine tuning neurons each. Every other cluster is composed of simple neurons.



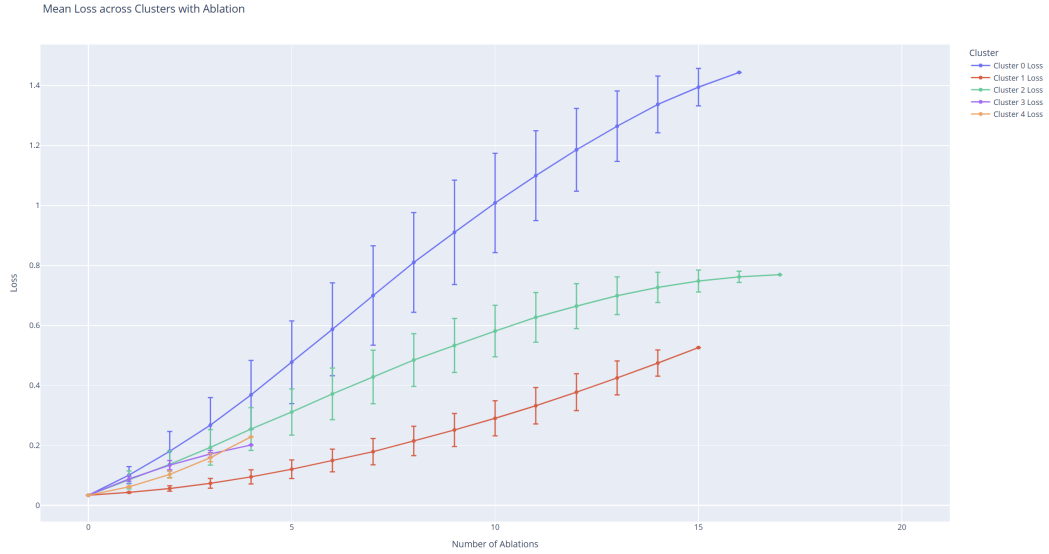

(a) Ablation study showing the impact on the loss function when removing neurons from specific clusters.

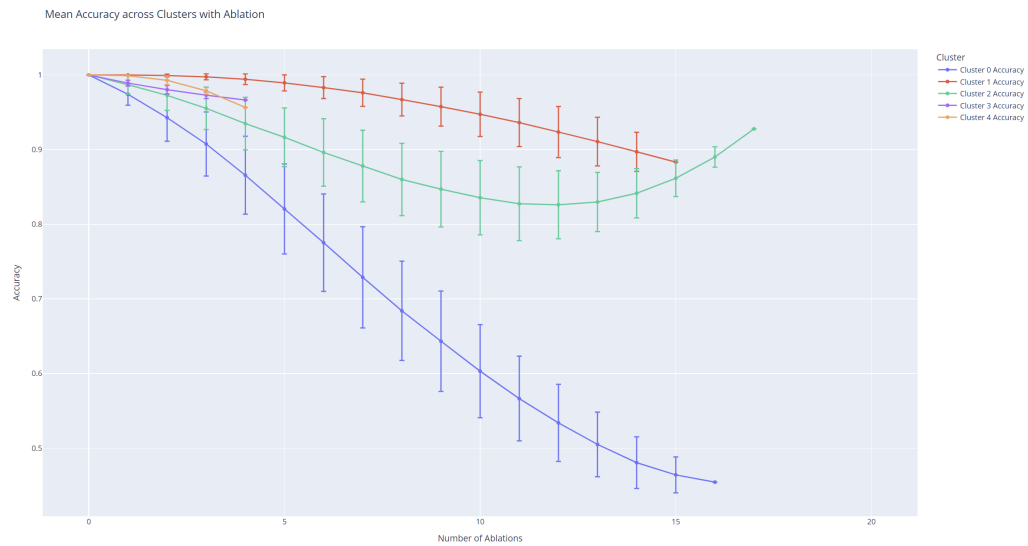

(b) Impact of neuron removal on accuracy.

Figure 39: Ablation study results. Loss and accuracy metrics highlight the impact of randomly removing neurons “number of ablations” number of neurons from a cluster. Note cluster 3 and 4 are composed of four fine tuning neurons each and deletion of every neuron in the cluster doesn’t affect the accuracy by much. Every other cluster is composed of simple neurons.

## 1018 G.9 Number of frequencies

### 1019 G.9.1 More overparameterized means less frequencies

1020 Scaling the number of neurons in the layer achieves experimental results within  $\mathcal{O}(\log(n))$ .

1021 Experiments in scaling the number of neurons show that the average number of frequencies found  
 1022 can be shifted based on hyperparameters, but this is something we don't fully understand at this point  
 1023 in time, but as our results in the main body show—it is still logarithmic. See Fig. 40.

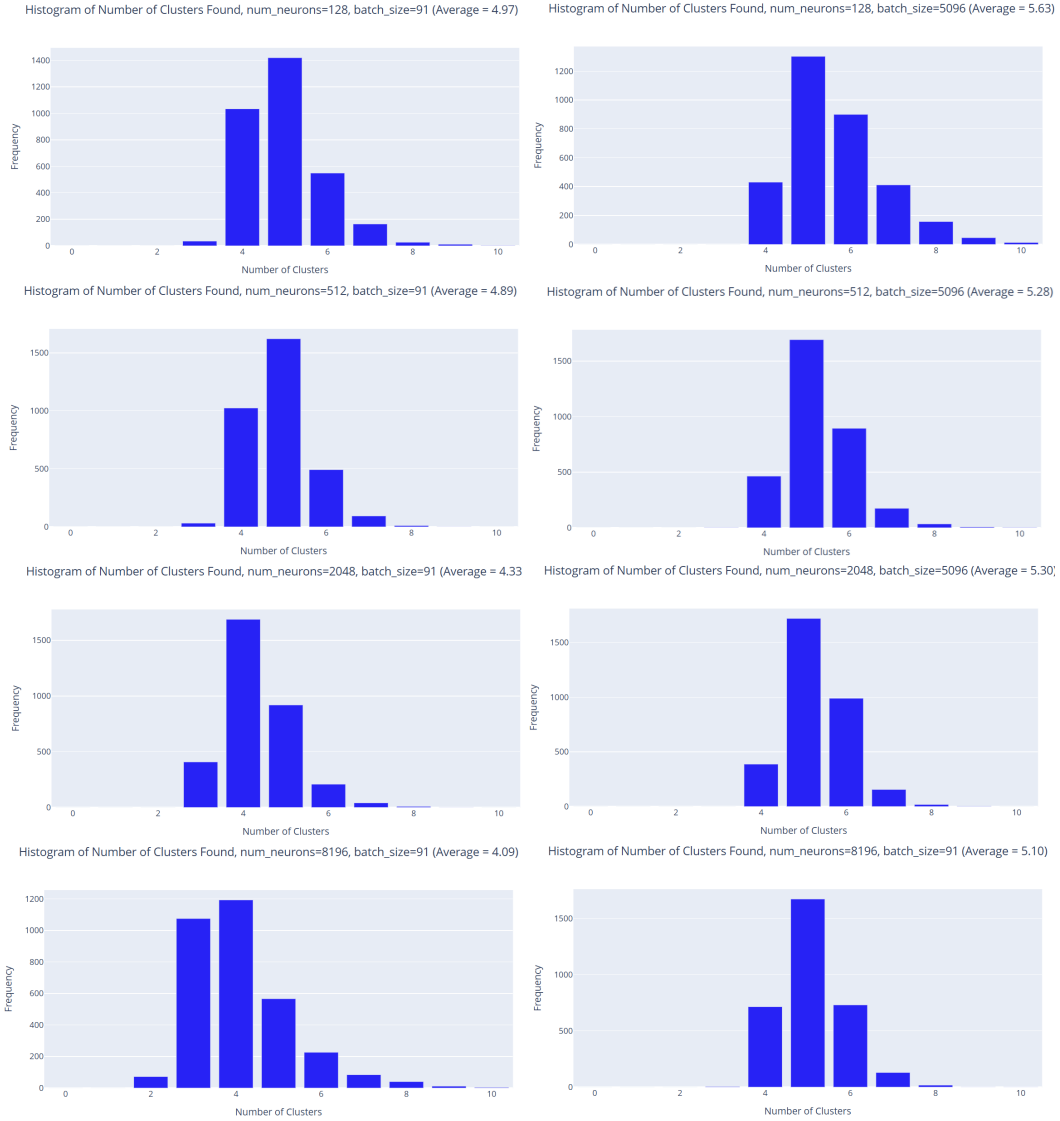

Figure 40: This figure shows that the scaling is always  $\mathcal{O}(\log(n))$ , even as the number of neurons is increased from 128, to 512, to 2048, to 8196. The first column is batch\_size = 91, and the second column is batch\_size = 5096, *i.e.*, the entire training set size. All results are upper bounded by  $\mathcal{O}(\log(n))$ .

### 1024 G.9.2 Adding depth also means less frequencies are learned

1025 In Figure 41 we see that adding layers results in fewer frequencies being learned.

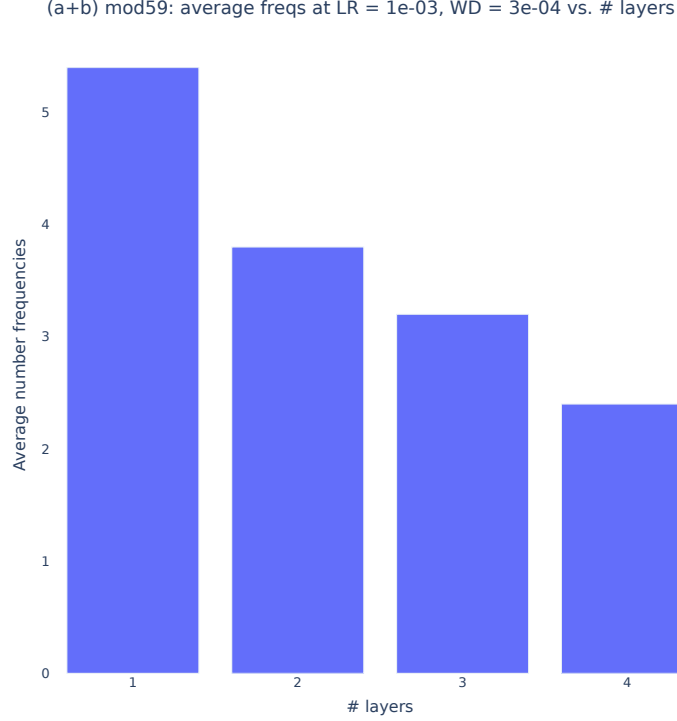

Figure 41: Adding depth causes the network to learn slightly less frequencies.

Indeed, instead of just looking at this for one hyperparameter combination, we can check it out for many like we did in figures in the main paper (see Figure 42).

### G.9.3 Deep networks learn error correcting codes: empirical results

**Deep networks learn error correcting codes.** This discussion was omitted from the main paper’s Discussion due to space constraints, but we believe it’s interesting.

Our result finding that in deep networks, layers after 1 keep around a % of first-order sinusoids (Figure 8) can be interpreted as the network constructing an error correcting code. We see in Figure 42 that deeper networks learn less frequencies. While this is true, they simultaneously achieve lower cross entropy loss (and better margins) with less frequencies than shallower networks 43. This is because the first order (simple) neurons in layer 2, compute the exact same coset computation as simple neurons performed in layer 1. Resultantly, the second order cosine neurons that store the correct answer as  $\cos(\frac{2\pi \cdot f(a+b-c)}{n})$ , which is maximized at the correct answer  $(a+b) \bmod n = c$ , receive an additional linear combination of Theorem 4.7. This boosts the height of the correct answer (linearly in the number of layers) as a function of number of distinct frequencies. Furthermore, it boosts the height of incorrect logits at most  $\mathcal{O}(\log(n))$ . After softmax, the exponential difference between the correct logit and incorrect logits is thus amplified, and thus the softmax (cross entropy loss) is much lower. With 1 hidden layer it was  $\mathcal{O}(n^{-\Omega(1)})$ . In general, with  $L$  the number of layers, we conjecture that after softmax, using  $\mathcal{O}(\log(n))$  distinct frequencies will give closer to  $\mathcal{O}(n^{-\Omega(L)})$  as the height of incorrect logits. This results from the network redundantly doing the same computation to “error correct” and thus reduce errors.

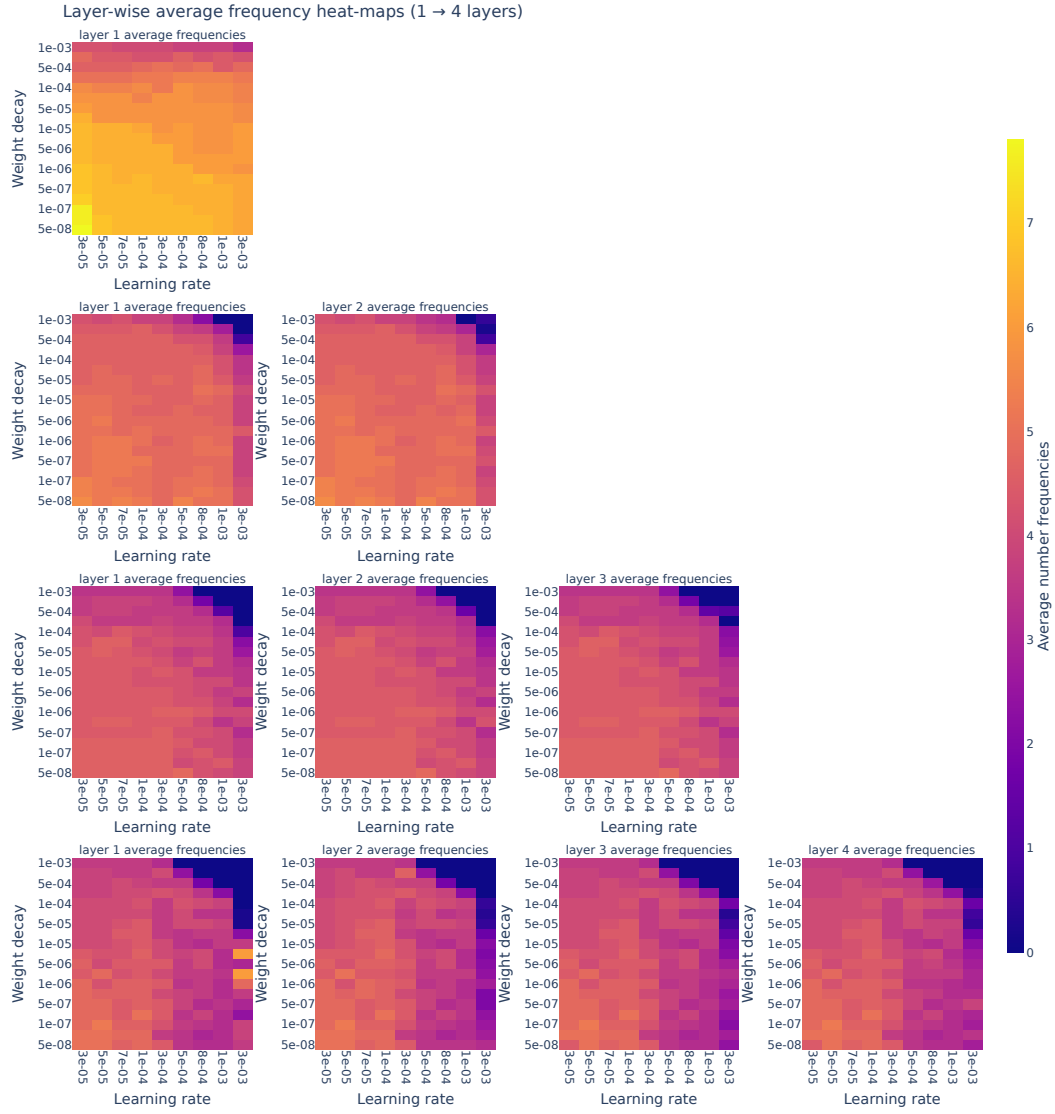

Figure 42: The number of frequencies found in the network decays as we add layers across almost all hyperparameter combinations.

Test CE-loss vs Total Avg Margin (epoch 5000): MLPs with one embedding

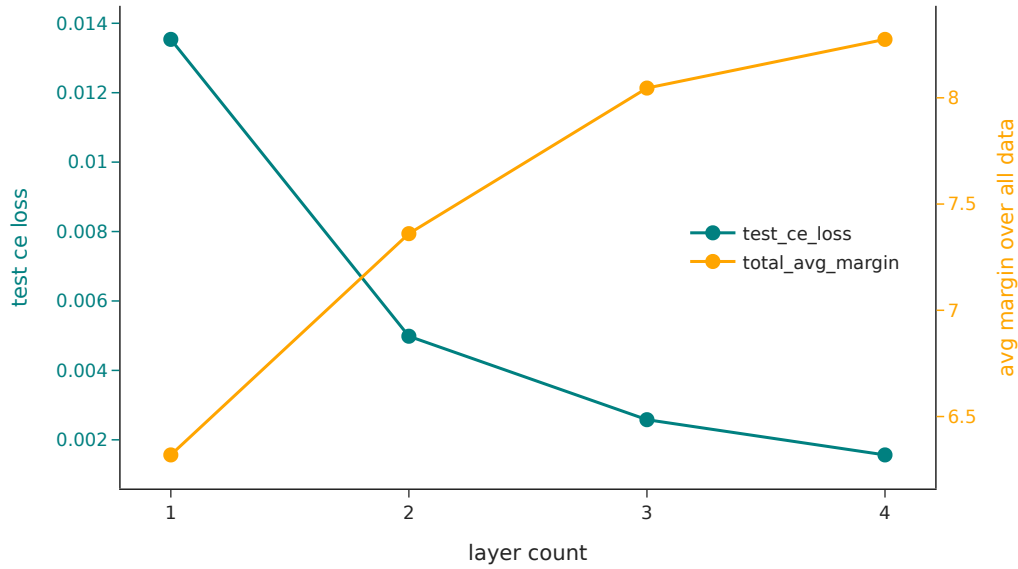

Figure 43: The loss and margins improve as layers are added, yet figure 42 shows that less frequencies are learned. This can be explained by the presence of first order sinusoidal neurons in layers after layer 1.

#### 1046 **G.10 Qualitative: equivariance of the cluster contributions to logits**

1047 Here you can see that the clusters of neurons are approximately equivariant to shifts in the inputs, *i.e.*  
 1048 the cosets shift with the inputs. We show that if you shift (a,b) both by 2, the clusters shift by 4.

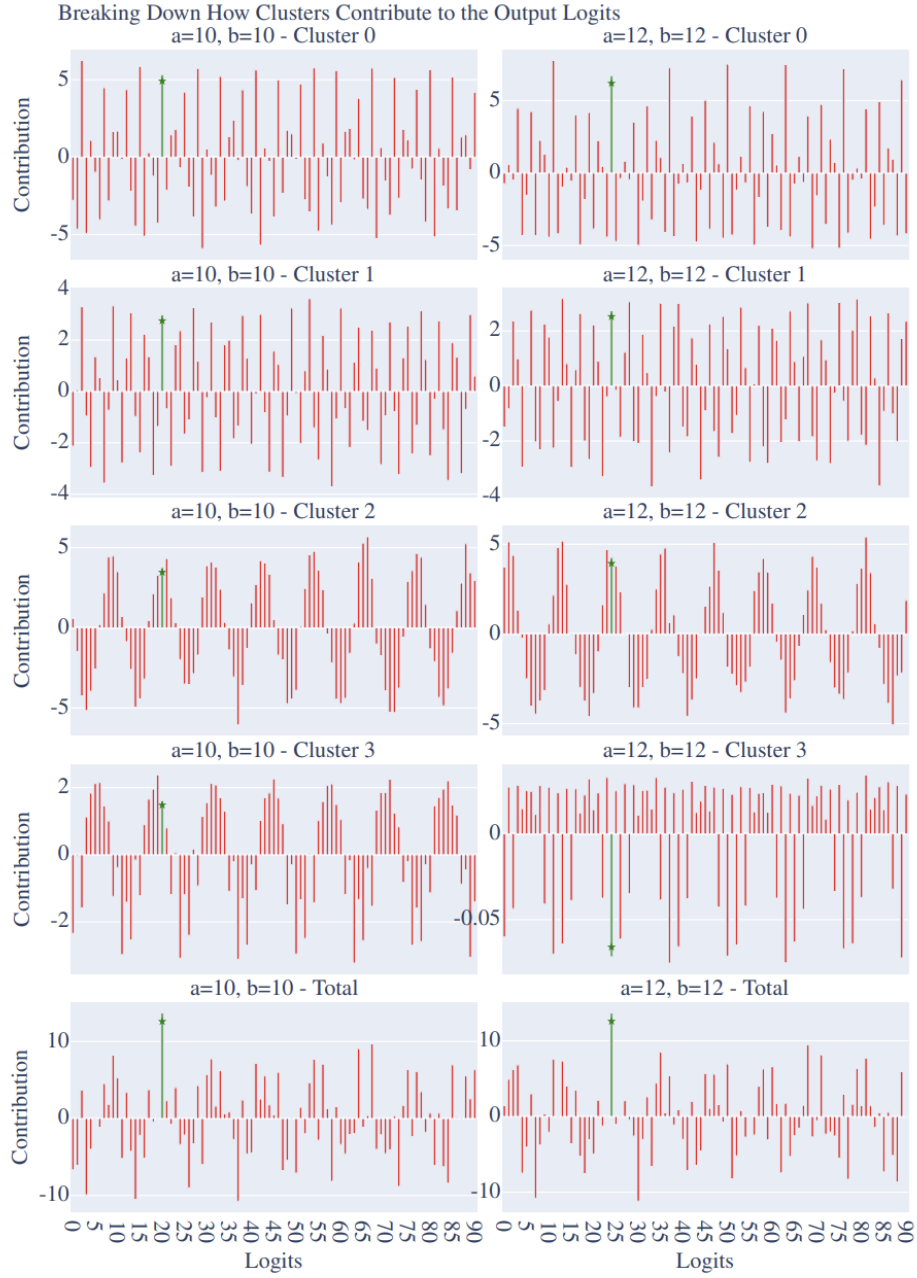

Figure 44: Clusters of neurons are approximately equivariant to shifts in the inputs, meaning coset clusters shift with the inputs. This suggests the network has learned cosets that it uses to intersect, via linear combinations, to perform the approximate CRT. This example demonstrates that the network did not learn a global minimum—e.g., Cluster 3 has only four neurons, limiting its expressivity and equivariance. Cluster frequencies: Cluster 0 (35, coset), Cluster 1 (25, approximate coset), Cluster 2 (8, approximate coset), and Cluster 3 (42, coset). This example uses the same random seed as the ablation study (Fig. 39(a)), where Cluster 0 is the most active. This data is from an MLP.

### 1049 G.10.1 Pizza model

1050 We take model A, specifically model\_p99zdpze51.pt, from [5] and make Figure 45, which shows  
 1051 that pizzas also output on approximate cosets and perform an approximate CRT. Note for example,  
 1052 that the output logits for the cluster with max freq = 15: has maximum activation along an approximate  
 1053 coset  $\frac{59}{15} = 3.93$ , and if the neuron activates strongly at  $a$  then it also activates strongly at  $a \pm 4$ .

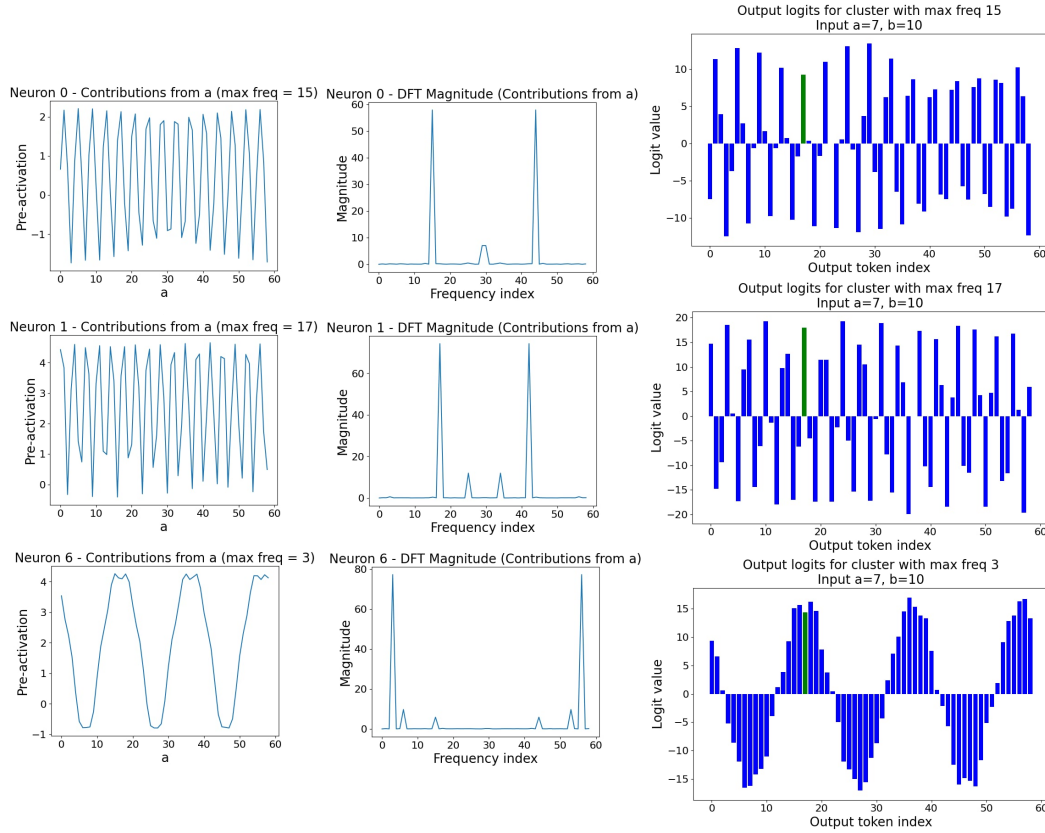

Figure 45: This figure shows three neurons and their DFT's, each from one of three clusters in model A (a pizza-transformer) from [5] for these experiments. Note that the pizza neurons (and clusters) are also implementing the abstract approximate Chinese Remainder Theorem algorithm, despite their low level differences with clocks.

1054 Furthermore, consider that remapping the pizza neurons makes their behavior look almost identical  
 1055 to simple neurons when they are remapped, see Figure 46.

Neuron 0 - Normalized Frequency (Cluster max freq = 15)

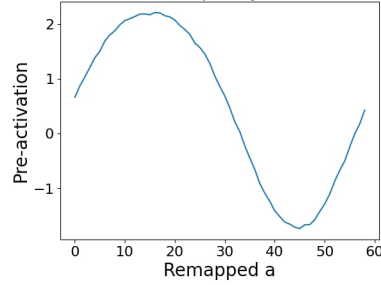

Neuron 1 - Normalized Frequency (Cluster max freq = 17)

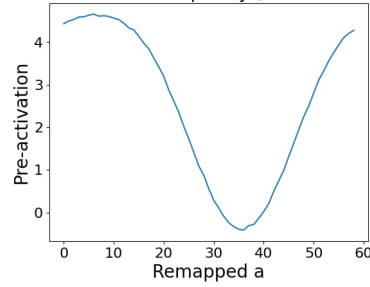

Neuron 6 - Normalized Frequency (Cluster max freq = 3)

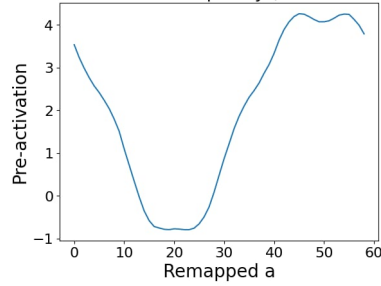

Figure 46: Remapping the pizza neurons shown in Figure 45 shows that they look identical to simple neurons.

## 1056 **G.10.2 Clock model**

1057 Here we show that the approximate CRT in a clock model (Fig. 47) looks just like it does in a pizza  
 1058 model (Fig. 45).



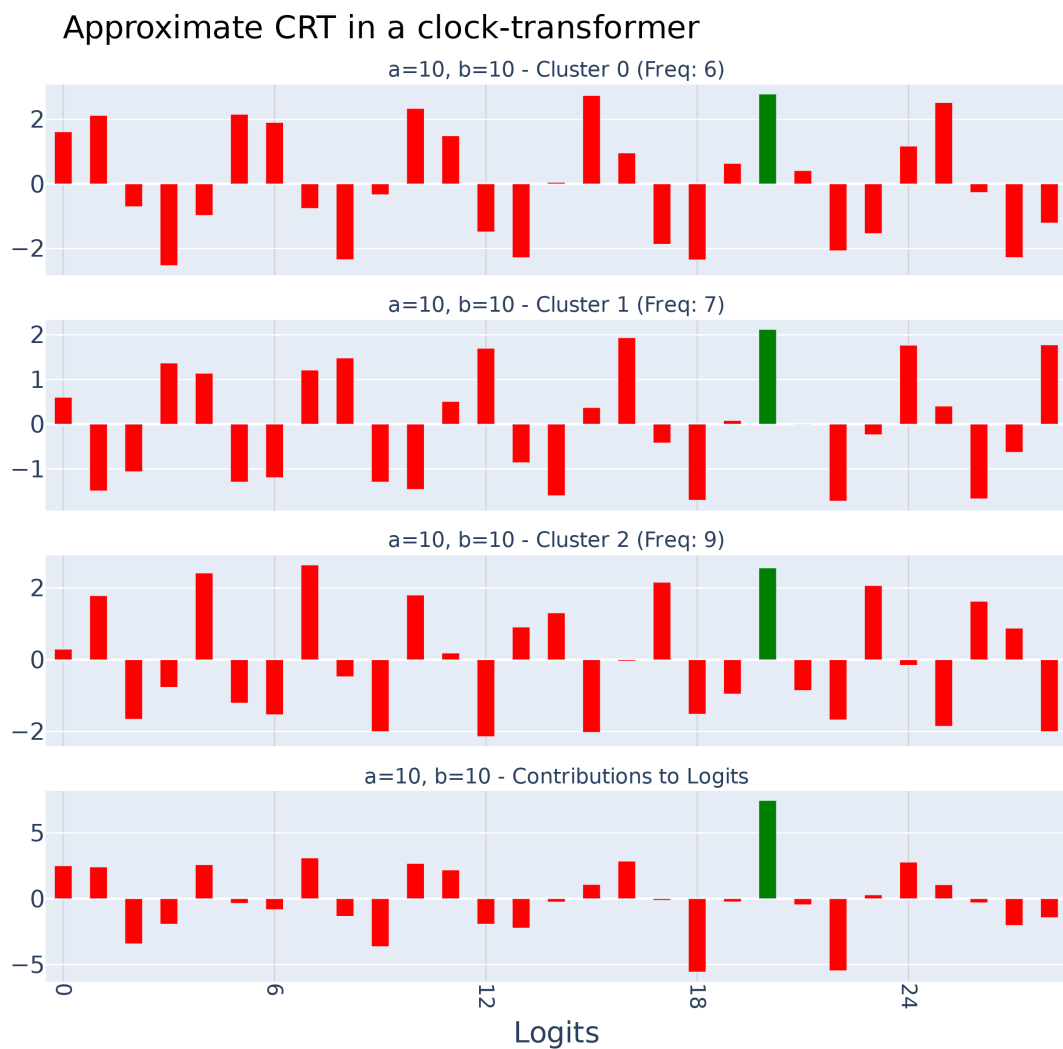

Figure 47: A view of the approximate CRT within a clock-transformer. We cluster all neurons together with the same frequencies, then inspect the cluster’s contribution to each logit by summing the contributions of each neuron in the cluster to each logit. Note that the three clusters each contribute to the logits.

## 1059 NeurIPS Paper Checklist

### 1060 1. Claims

1061 Question: Do the main claims made in the abstract and introduction accurately reflect the  
1062 paper's contributions and scope?

1063 Answer: [Yes]

1064 Justification: The claims made in the abstract and introduction are backed by proofs in  
1065 Appendix B and Appendix C, and/or backed by figures over many random seeds located in  
1066 sections 4.3 and 4.4.

1067 Guidelines:

- 1068 • The answer NA means that the abstract and introduction do not include the claims  
1069 made in the paper.
- 1070 • The abstract and/or introduction should clearly state the claims made, including the  
1071 contributions made in the paper and important assumptions and limitations. A No or  
1072 NA answer to this question will not be perceived well by the reviewers.
- 1073 • The claims made should match theoretical and experimental results, and reflect how  
1074 much the results can be expected to generalize to other settings.
- 1075 • It is fine to include aspirational goals as motivation as long as it is clear that these goals  
1076 are not attained by the paper.

### 1077 2. Limitations

1078 Question: Does the paper discuss the limitations of the work performed by the authors?

1079 Answer: [Yes]

1080 Justification: The limitations are discussed in section 5.1; the limitations of this work are  
1081 closer to large open questions rather than limitations. We list them primarily because we  
1082 want attention drawn to them as we believe them valuable for future discussions.

1083 Guidelines:

- 1084 • The answer NA means that the paper has no limitation while the answer No means that  
1085 the paper has limitations, but those are not discussed in the paper.
- 1086 • The authors are encouraged to create a separate "Limitations" section in their paper.
- 1087 • The paper should point out any strong assumptions and how robust the results are to  
1088 violations of these assumptions (e.g., independence assumptions, noiseless settings,  
1089 model well-specification, asymptotic approximations only holding locally). The authors  
1090 should reflect on how these assumptions might be violated in practice and what the  
1091 implications would be.
- 1092 • The authors should reflect on the scope of the claims made, e.g., if the approach was  
1093 only tested on a few datasets or with a few runs. In general, empirical results often  
1094 depend on implicit assumptions, which should be articulated.
- 1095 • The authors should reflect on the factors that influence the performance of the approach.  
1096 For example, a facial recognition algorithm may perform poorly when image resolution  
1097 is low or images are taken in low lighting. Or a speech-to-text system might not be  
1098 used reliably to provide closed captions for online lectures because it fails to handle  
1099 technical jargon.
- 1100 • The authors should discuss the computational efficiency of the proposed algorithms  
1101 and how they scale with dataset size.
- 1102 • If applicable, the authors should discuss possible limitations of their approach to  
1103 address problems of privacy and fairness.
- 1104 • While the authors might fear that complete honesty about limitations might be used by  
1105 reviewers as grounds for rejection, a worse outcome might be that reviewers discover  
1106 limitations that aren't acknowledged in the paper. The authors should use their best  
1107 judgment and recognize that individual actions in favor of transparency play an impor-  
1108 tant role in developing norms that preserve the integrity of the community. Reviewers  
1109 will be specifically instructed to not penalize honesty concerning limitations.

### 1110 3. Theory assumptions and proofs

Question: For each theoretical result, does the paper provide the full set of assumptions and a complete (and correct) proof?

Answer: [Yes]

Justification: The entire paper is built around justifying the assumption that neural networks learn sinusoidal functions, required by all theoretical work in the paper. All prior works use this same assumption, but we are the first work to display this quantitatively over a gigantic range of hyperparameters, architectures, depths, widths, seeds and moduli.

Guidelines:

- The answer NA means that the paper does not include theoretical results.
- All the theorems, formulas, and proofs in the paper should be numbered and cross-referenced.
- All assumptions should be clearly stated or referenced in the statement of any theorems.
- The proofs can either appear in the main paper or the supplemental material, but if they appear in the supplemental material, the authors are encouraged to provide a short proof sketch to provide intuition.
- Inversely, any informal proof provided in the core of the paper should be complemented by formal proofs provided in appendix or supplemental material.
- Theorems and Lemmas that the proof relies upon should be properly referenced.

#### 4. Experimental result reproducibility

Question: Does the paper fully disclose all the information needed to reproduce the main experimental results of the paper to the extent that it affects the main claims and/or conclusions of the paper (regardless of whether the code and data are provided or not)?

Answer: [Yes]

Justification: Yes. The paper outlines the architectures tested, gives the precise experimental details for making all plots and provides open source code that is obsessively GPU optimized: giving anyone with just one GPU the ability to reproduce every plot in the paper over a few days worth of compute. We give all versions, even the cuda version in the codebase, in case the order of operations of Jax varies across versions.

Guidelines:

- The answer NA means that the paper does not include experiments.
- If the paper includes experiments, a No answer to this question will not be perceived well by the reviewers: Making the paper reproducible is important, regardless of whether the code and data are provided or not.
- If the contribution is a dataset and/or model, the authors should describe the steps taken to make their results reproducible or verifiable.
- Depending on the contribution, reproducibility can be accomplished in various ways. For example, if the contribution is a novel architecture, describing the architecture fully might suffice, or if the contribution is a specific model and empirical evaluation, it may be necessary to either make it possible for others to replicate the model with the same dataset, or provide access to the model. In general, releasing code and data is often one good way to accomplish this, but reproducibility can also be provided via detailed instructions for how to replicate the results, access to a hosted model (e.g., in the case of a large language model), releasing of a model checkpoint, or other means that are appropriate to the research performed.
- While NeurIPS does not require releasing code, the conference does require all submissions to provide some reasonable avenue for reproducibility, which may depend on the nature of the contribution. For example
  - (a) If the contribution is primarily a new algorithm, the paper should make it clear how to reproduce that algorithm.
  - (b) If the contribution is primarily a new model architecture, the paper should describe the architecture clearly and fully.
  - (c) If the contribution is a new model (e.g., a large language model), then there should either be a way to access this model for reproducing the results or a way to reproduce the model (e.g., with an open-source dataset or instructions for how to construct the dataset).

1166 (d) We recognize that reproducibility may be tricky in some cases, in which case  
1167 authors are welcome to describe the particular way they provide for reproducibility.  
1168 In the case of closed-source models, it may be that access to the model is limited in  
1169 some way (e.g., to registered users), but it should be possible for other researchers  
1170 to have some path to reproducing or verifying the results.

## 1171 5. Open access to data and code

1172 Question: Does the paper provide open access to the data and code, with sufficient instruc-  
1173 tions to faithfully reproduce the main experimental results, as described in supplemental  
1174 material?

1175 Answer: [Yes]

1176 Justification: See section E, the code requires all version information in requirements.txt,  
1177 including information about cuda versions in the readme.

1178 Guidelines:

- 1179 • The answer NA means that paper does not include experiments requiring code.
- 1180 • Please see the NeurIPS code and data submission guidelines ([https://nips.cc/  
1181 public/guides/CodeSubmissionPolicy](https://nips.cc/public/guides/CodeSubmissionPolicy)) for more details.
- 1182 • While we encourage the release of code and data, we understand that this might not be  
1183 possible, so “No” is an acceptable answer. Papers cannot be rejected simply for not  
1184 including code, unless this is central to the contribution (e.g., for a new open-source  
1185 benchmark).
- 1186 • The instructions should contain the exact command and environment needed to run to  
1187 reproduce the results. See the NeurIPS code and data submission guidelines ([https:  
1188 //nips.cc/public/guides/CodeSubmissionPolicy](https://nips.cc/public/guides/CodeSubmissionPolicy)) for more details.
- 1189 • The authors should provide instructions on data access and preparation, including how  
1190 to access the raw data, preprocessed data, intermediate data, and generated data, etc.
- 1191 • The authors should provide scripts to reproduce all experimental results for the new  
1192 proposed method and baselines. If only a subset of experiments are reproducible, they  
1193 should state which ones are omitted from the script and why.
- 1194 • At submission time, to preserve anonymity, the authors should release anonymized  
1195 versions (if applicable).
- 1196 • Providing as much information as possible in supplemental material (appended to the  
1197 paper) is recommended, but including URLs to data and code is permitted.

## 1198 6. Experimental setting/details

1199 Question: Does the paper specify all the training and test details (e.g., data splits, hyper-  
1200 parameters, how they were chosen, type of optimizer, etc.) necessary to understand the  
1201 results?

1202 Answer: [Yes]

1203 Justification: All of this is in the main paper, but is thoroughly detailed in Appendix 4.4.

1204 Guidelines:

- 1205 • The answer NA means that the paper does not include experiments.
- 1206 • The experimental setting should be presented in the core of the paper to a level of detail  
1207 that is necessary to appreciate the results and make sense of them.
- 1208 • The full details can be provided either with the code, in appendix, or as supplemental  
1209 material.

## 1210 7. Experiment statistical significance

1211 Question: Does the paper report error bars suitably and correctly defined or other appropriate  
1212 information about the statistical significance of the experiments?

1213 Answer: [Yes]

1214 Justification: The paper goes to extreme lengths to quantitatively analyze the correctness of  
1215 our claims, providing  $R^2$  of our claims over large ranges of hyperparameters, architectures,  
1216 depths, widths and varied training data (moduli). The data we present is actually the worst  
1217 case for our arguments, being that if a model, after replacing neurons by our simple neuron

model, classifies a single point wrong, while the model had 100% accuracy on the test and train data, we mark it with a purple dot. These purple dots are rare and only show up on the edges of where networks can learn *i.e.* on regions with suboptimal hyperparameters; networks are likely fitting more noise in such regions.

Guidelines:

- The answer NA means that the paper does not include experiments.
- The authors should answer "Yes" if the results are accompanied by error bars, confidence intervals, or statistical significance tests, at least for the experiments that support the main claims of the paper.
- The factors of variability that the error bars are capturing should be clearly stated (for example, train/test split, initialization, random drawing of some parameter, or overall run with given experimental conditions).
- The method for calculating the error bars should be explained (closed form formula, call to a library function, bootstrap, etc.)
- The assumptions made should be given (e.g., Normally distributed errors).
- It should be clear whether the error bar is the standard deviation or the standard error of the mean.
- It is OK to report 1-sigma error bars, but one should state it. The authors should preferably report a 2-sigma error bar than state that they have a 96% CI, if the hypothesis of Normality of errors is not verified.
- For asymmetric distributions, the authors should be careful not to show in tables or figures symmetric error bars that would yield results that are out of range (e.g. negative error rates).
- If error bars are reported in tables or plots, The authors should explain in the text how they were calculated and reference the corresponding figures or tables in the text.

## 8. Experiments compute resources

Question: For each experiment, does the paper provide sufficient information on the computer resources (type of compute workers, memory, time of execution) needed to reproduce the experiments?

Answer: [Yes]

Justification: All experiments in the paper can be reproduced *with our code* with a single RTX8000 GPU in less than two weeks, we went to great lengths to GPU optimize the code as much as possible. The training we did used RTX8000 GPU's, ancient by today's standards. Each GPU added would divide the training time linearly. The dataset is tiny until large  $n$  and is easy to train, with networks learning within 100 epochs.

Guidelines:

- The answer NA means that the paper does not include experiments.
- The paper should indicate the type of compute workers CPU or GPU, internal cluster, or cloud provider, including relevant memory and storage.
- The paper should provide the amount of compute required for each of the individual experimental runs as well as estimate the total compute.
- The paper should disclose whether the full research project required more compute than the experiments reported in the paper (e.g., preliminary or failed experiments that didn't make it into the paper).

## 9. Code of ethics

Question: Does the research conducted in the paper conform, in every respect, with the NeurIPS Code of Ethics <https://neurips.cc/public/EthicsGuidelines>?

Answer: [Yes]

Justification: We follow the Code of Ethics.

Guidelines:

- The answer NA means that the authors have not reviewed the NeurIPS Code of Ethics.
- If the authors answer No, they should explain the special circumstances that require a deviation from the Code of Ethics.

- 1271 • The authors should make sure to preserve anonymity (e.g., if there is a special consid-  
1272 eration due to laws or regulations in their jurisdiction).

1273 **10. Broader impacts**

1274 Question: Does the paper discuss both potential positive societal impacts and negative  
1275 societal impacts of the work performed?

1276 Answer: [Yes]

1277 Justification: We highlight the positive impacts of our work: better understanding what  
1278 deep networks learn in the discussion and limitations section 5.1. We can not conceive any  
1279 negative aspects; this is not capabilities research.

1280 Guidelines:

- 1281 • The answer NA means that there is no societal impact of the work performed.
- 1282 • If the authors answer NA or No, they should explain why their work has no societal  
1283 impact or why the paper does not address societal impact.
- 1284 • Examples of negative societal impacts include potential malicious or unintended uses  
1285 (e.g., disinformation, generating fake profiles, surveillance), fairness considerations  
1286 (e.g., deployment of technologies that could make decisions that unfairly impact specific  
1287 groups), privacy considerations, and security considerations.
- 1288 • The conference expects that many papers will be foundational research and not tied  
1289 to particular applications, let alone deployments. However, if there is a direct path to  
1290 any negative applications, the authors should point it out. For example, it is legitimate  
1291 to point out that an improvement in the quality of generative models could be used to  
1292 generate deepfakes for disinformation. On the other hand, it is not needed to point out  
1293 that a generic algorithm for optimizing neural networks could enable people to train  
1294 models that generate Deepfakes faster.
- 1295 • The authors should consider possible harms that could arise when the technology is  
1296 being used as intended and functioning correctly, harms that could arise when the  
1297 technology is being used as intended but gives incorrect results, and harms following  
1298 from (intentional or unintentional) misuse of the technology.
- 1299 • If there are negative societal impacts, the authors could also discuss possible mitigation  
1300 strategies (e.g., gated release of models, providing defenses in addition to attacks,  
1301 mechanisms for monitoring misuse, mechanisms to monitor how a system learns from  
1302 feedback over time, improving the efficiency and accessibility of ML).

1303 **11. Safeguards**

1304 Question: Does the paper describe safeguards that have been put in place for responsible  
1305 release of data or models that have a high risk for misuse (e.g., pretrained language models,  
1306 image generators, or scraped datasets)?

1307 Answer: [NA]

1308 Justification:

1309 Guidelines:

- 1310 • The answer NA means that the paper poses no such risks.
- 1311 • Released models that have a high risk for misuse or dual-use should be released with  
1312 necessary safeguards to allow for controlled use of the model, for example by requiring  
1313 that users adhere to usage guidelines or restrictions to access the model or implementing  
1314 safety filters.
- 1315 • Datasets that have been scraped from the Internet could pose safety risks. The authors  
1316 should describe how they avoided releasing unsafe images.
- 1317 • We recognize that providing effective safeguards is challenging, and many papers do  
1318 not require this, but we encourage authors to take this into account and make a best  
1319 faith effort.

1320 **12. Licenses for existing assets**

1321 Question: Are the creators or original owners of assets (e.g., code, data, models), used in  
1322 the paper, properly credited and are the license and terms of use explicitly mentioned and  
1323 properly respected?

Answer: [Yes]

Justification: We wrote all the code ourselves. Part of the code is a translation, the clock and pizza code from [5] was read, and translated into GPU optimized Jax, this is stated in the main paper as “We use the exact transformer architectures from [5],...”.

Guidelines:

- The answer NA means that the paper does not use existing assets.
- The authors should cite the original paper that produced the code package or dataset.
- The authors should state which version of the asset is used and, if possible, include a URL.
- The name of the license (e.g., CC-BY 4.0) should be included for each asset.
- For scraped data from a particular source (e.g., website), the copyright and terms of service of that source should be provided.
- If assets are released, the license, copyright information, and terms of use in the package should be provided. For popular datasets, `paperswithcode.com/datasets` has curated licenses for some datasets. Their licensing guide can help determine the license of a dataset.
- For existing datasets that are re-packaged, both the original license and the license of the derived asset (if it has changed) should be provided.
- If this information is not available online, the authors are encouraged to reach out to the asset’s creators.

### 13. New assets

Question: Are new assets introduced in the paper well documented and is the documentation provided alongside the assets?

Answer: [NA]

Justification: NA

Guidelines:

- The answer NA means that the paper does not release new assets.
- Researchers should communicate the details of the dataset/code/model as part of their submissions via structured templates. This includes details about training, license, limitations, etc.
- The paper should discuss whether and how consent was obtained from people whose asset is used.
- At submission time, remember to anonymize your assets (if applicable). You can either create an anonymized URL or include an anonymized zip file.

### 14. Crowdsourcing and research with human subjects

Question: For crowdsourcing experiments and research with human subjects, does the paper include the full text of instructions given to participants and screenshots, if applicable, as well as details about compensation (if any)?

Answer: [NA]

Justification: NA

Guidelines:

- The answer NA means that the paper does not involve crowdsourcing nor research with human subjects.
- Including this information in the supplemental material is fine, but if the main contribution of the paper involves human subjects, then as much detail as possible should be included in the main paper.
- According to the NeurIPS Code of Ethics, workers involved in data collection, curation, or other labor should be paid at least the minimum wage in the country of the data collector.

### 15. Institutional review board (IRB) approvals or equivalent for research with human subjects

1375 Question: Does the paper describe potential risks incurred by study participants, whether  
 1376 such risks were disclosed to the subjects, and whether Institutional Review Board (IRB)  
 1377 approvals (or an equivalent approval/review based on the requirements of your country or  
 1378 institution) were obtained?

1379 Answer: [NA]

1380 Justification: NA

1381 Guidelines:

- 1382 • The answer NA means that the paper does not involve crowdsourcing nor research with
- 1383 human subjects.
- 1384 • Depending on the country in which research is conducted, IRB approval (or equivalent)
- 1385 may be required for any human subjects research. If you obtained IRB approval, you
- 1386 should clearly state this in the paper.
- 1387 • We recognize that the procedures for this may vary significantly between institutions
- 1388 and locations, and we expect authors to adhere to the NeurIPS Code of Ethics and the
- 1389 guidelines for their institution.
- 1390 • For initial submissions, do not include any information that would break anonymity (if
- 1391 applicable), such as the institution conducting the review.

1392 **16. Declaration of LLM usage**

1393 Question: Does the paper describe the usage of LLMs if it is an important, original, or

1394 non-standard component of the core methods in this research? Note that if the LLM is used

1395 only for writing, editing, or formatting purposes and does not impact the core methodology,

1396 scientific rigor, or originality of the research, declaration is not required.

1397 Answer: [NA]

1398 Justification: NA

1399 Guidelines:

- 1400 • The answer NA means that the core method development in this research does not
- 1401 involve LLMs as any important, original, or non-standard components.
- 1402 • Please refer to our LLM policy (<https://neurips.cc/Conferences/2025/LLM>)
- 1403 for what should or should not be described.
